# Supplementary material for: Rh(iii)-catalyzed C–H activation/cyclization of oximes with alkenes for regioselective synthesis of isoquinolines
Source: Royal Society of Chemistry journal article supplement (doi:10.1039/c6ob00942e), 2016-01-01

## Supporting Information

for

### **Rh(III)-Catalyzed C-H activation/cyclization of Oximes with alkenes**

#### **for regioselective synthesis of isoquinolines**

Renjie Chen, Jifeng Qi, Zhenjun Mao, and Sunliang Cui\*

*College of Pharmaceutical Sciences, ZheJiang University, Hangzhou,*

*ZheJiang 310058, China*

*E-mail: slcui@zju.edu.cn*

### Contents

|                                                                |         |
|----------------------------------------------------------------|---------|
| 1. General Information                                         | S2-S3   |
| 2. Typical Synthesis Procedure of <b>3a</b>                    | S3      |
| 3. Procedure for Total Synthesis of <b>Moxaverine</b>          | S3-S6   |
| 4. Characterization of <b>3</b> , <b>8</b> , <b>Moxaverine</b> | S6-S20  |
| 5. Kinetic Isotope Effect Study                                | S20-S21 |
| 6. Copies of NMR Spectra                                       | S22-S75 |

## 1. General Information:

Infrared spectra were obtained on a FTIR spectrometer.  $^1\text{H}$  NMR and  $^{13}\text{C}$  NMR spectra were recorded on BRUKER AVANCE III 400 spectrometer, BRUKER AVANCE III 500 spectrometer, BRUKER AVANCE III 600 spectrometer.  $\text{CDCl}_3$  were used as solvent. Chemical shifts were referenced relative to residual solvent. The following abbreviations are used to describe peak patterns where appropriate: s = singlet, d = doublet, t = triplet, q = quartet, m = multiplet. Coupling constants ( $J$ ) are reported in Hertz (Hz). HRMS were performed on Waters GCT Premier Time of Flight Mass Spectrometer (EI). Melting points were measured with micro melting point apparatus.

$[\text{Cp}^*\text{RhCl}_2]_2$ , PivOH,  $\text{CH}_3\text{CN}$ , THF,  $\text{CH}_2\text{Cl}_2$  were commercial available. The Oxime compounds **1** and the alkenes **2** were either commercial available, or easily prepared according the literature.

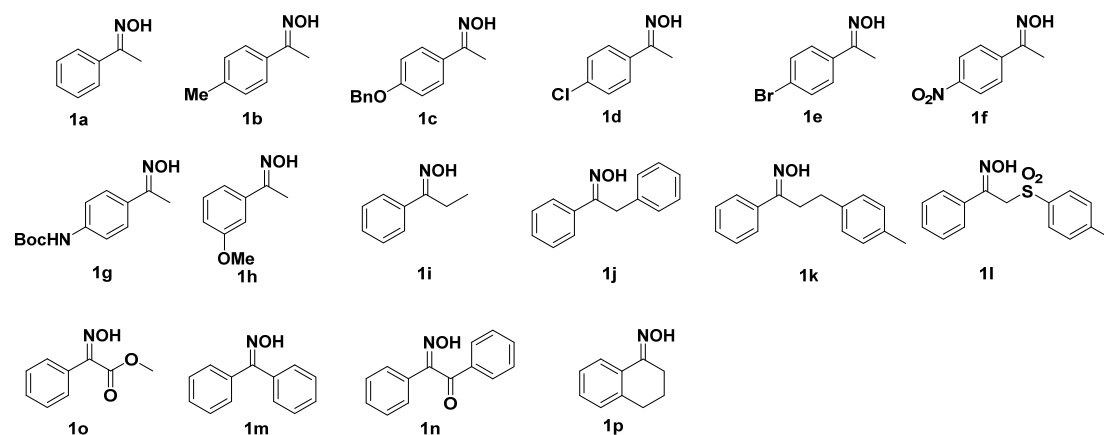

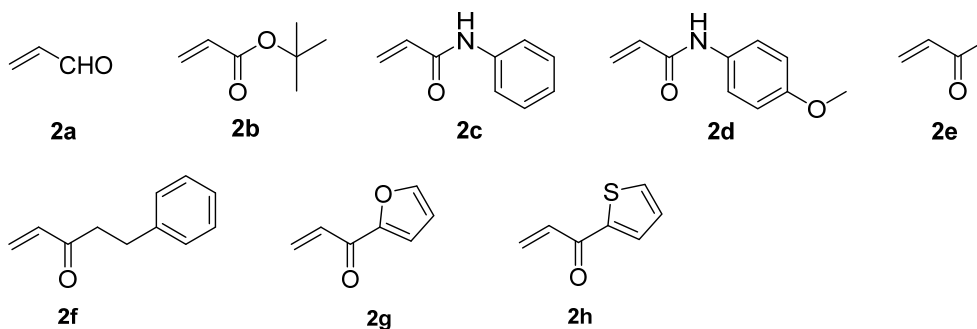

## 2. Typical Procedure for Synthesis of **3a**:

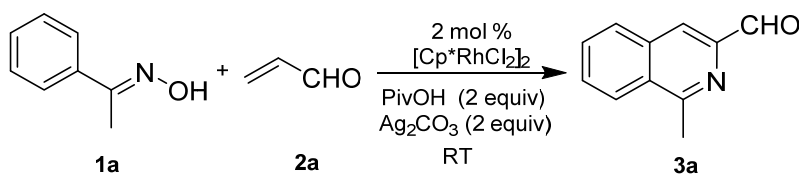

Under air, a vial equipped with a stir bar was charged with **1a** (27.0 mg, 0.2 mmol), acrolein **2a** (33.6 mg, 0.6 mmol),  $[\text{Cp}^*\text{RhCl}_2]_2$  (2.5 mg, 2 mol %),  $\text{Ag}_2\text{CO}_3$  (110.3 mg, 0.4 mmol), PivOH (40.8 mg, 0.4 mmol), MeCN (1 mL). The reaction mixture was stirred at room temperature for 18 h. After the completion of the reaction, the solvent was concentrated in vacuum and the residue was purified by flash column chromatography on silica gel using ethyl acetate/petroleum ether (v/v, 1:10) as eluent to give **3a** as a white solid (28.7 mg, 84% yield).

## 3. Procedure for Total Synthesis of Moxaverine:

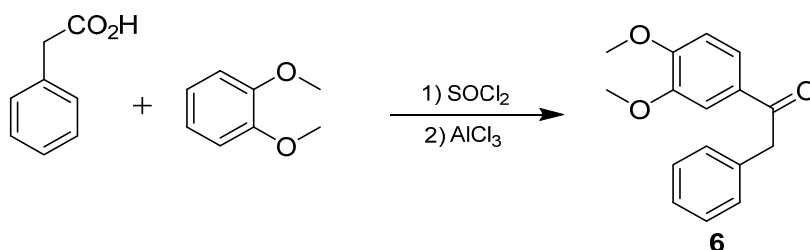

To a 100 mL flask containing phenylacetic acid (2.0 g, 14.7 mmol), 40 ml DCM, thionyl chloride (8.7 g, 73.5 mmol) was added and the

reaction mixture was heated to reflux for 3 h and then DCM and excess thionyl chloride were removed by distillation. The resulting oil was transferred to another two necked round bottom flask containing dry DCM (60 mL) and 1,2-dimethoxy benzene (1.7 g, 12.3 mmol). AlCl<sub>3</sub> (2.1 g, 15.9 mmol) was added in small portions and the mixture was stirred at room temperature for 3 h, after which the reaction was quenched by pouring into ice water (25 mL). The mixture was extracted with DCM and the combined organic layers were evaporated under vacuum. Recrystallization from ethyl alcohol gave the desired product **6** as yellow solid (2.5 g, 78.9% yield).

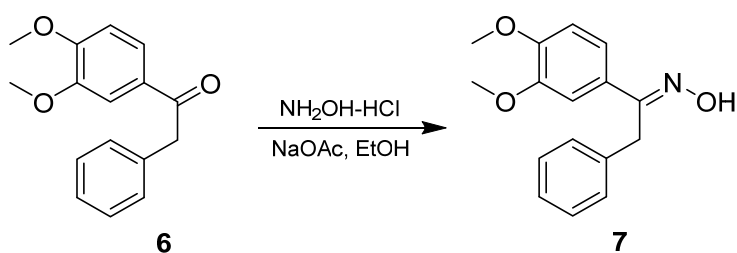

A mixture of **6** (2.5 g, 9.8 mmol), NH<sub>2</sub>OH·HCl (1.4 g, 20.1 mmol), NaOAc (1.6 g, 20.1 mmol), ethyl alcohol (50 mL) were placed in a 100 mL round-bottom flask with a reflux condenser and stirred under reflux. After the completion of the reaction (monitored by TLC), the mixture was cooled to room temperature and extracted with ethyl acetate. The combined organic layers was dried by Na<sub>2</sub>SO<sub>4</sub> and evaporated under vacuum to give the oxime **7** as pale yellow solid (2.6 g, 98% yield).

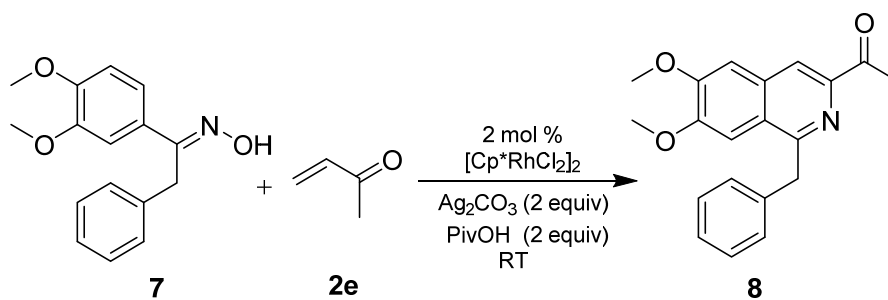

Under air, a vial equipped with a stir bar was charged with **7** (54.0 mg, 0.2 mmol), **2e** (66.1 mg, 0.6 mmol),  $[\text{Cp}^*\text{RhCl}_2]_2$  (2.5 mg, 2.0 mol%),  $\text{Ag}_2\text{CO}_3$  (110.3 mg, 0.4 mmol), PivOH (40.8 mg, 0.4 mmol), MeCN (1 mL). The reaction mixture was stirred at room temperature for 18 h. After the completion of the reaction, the solvent was concentrated in vacuum and the residue was purified by flash column chromatography on silica gel using ethyl acetate/petroleum ether (v/v, 1:5) as eluent to give **8** as a white solid (48.8 mg, 76.0% yield).

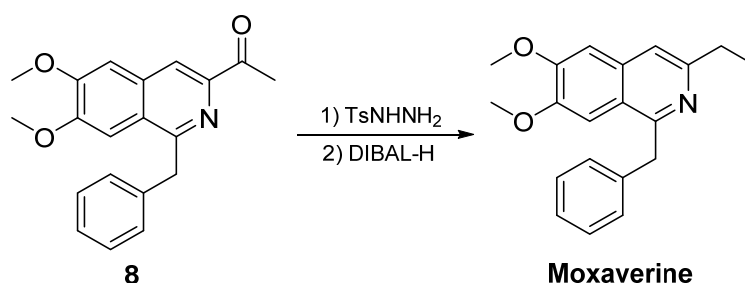

The ketone **8** (48.8 mg, 0.15 mmol) was heated to boiling with *p*-Toluenesulfonyl hydrazide (27.9 mg, 0.15 mmol) in methanol (10 ml). After 12 h, the reaction mixture was evaporated to dryness under reduced pressure. The resulting product was transferred to a dry two necked round bottom flask in dry DCM (20 mL) was added DIBAL-H (45.0  $\mu\text{L}$ , 1 M in Hexane, 0.45 mmol) drop-wise. The reaction mixture was stirred at RT for 1 h. After the completion of the reaction, the solvent was concentrated in

vacuum and the residue was purified by flash column chromatography on silica gel with ethyl acetate/petroleum ether (v/v, 1:5) as the eluent to give the product Moxaverine (29.9 mg, 64.9% yield).

#### 4. Characterization of 3, 8, Moxaverine:

##### 1-Methyloisoquinoline-3-carbaldehyde (3a)

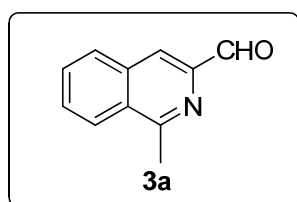

White solid; m.p. 62-68 °C;  $^1\text{H}$  NMR ( $\text{CDCl}_3$ , 500MHz),  $\delta$ : 10.23 (s, 1H), 8.25 (s, 1H), 8.21-8.20 (m, 1H), 8.02-8.01(m, 1H), 7.79-7.77 (m, 2H), 3.06 (s, 3H);  $^{13}\text{C}$  NMR ( $\text{CDCl}_3$ , 100MHz),  $\delta$ : 193.72, 160.00, 145.91, 135.41, 131.05, 130.17, 129.74, 129.54, 126.04, 121.31, 22.61; IR (KBr)  $\nu$ : 2957, 2925, 2850, 1702, 1656, 1389, 1261, 751, 707, 622  $\text{cm}^{-1}$ ; HRMS (EI) ( $m/z$ ): calcd for  $\text{C}_{11}\text{H}_9\text{NO}$  ( $\text{M}^+$ ): 171.0684; Found: 171.0686.

##### 1,6-Dimethyloisoquinoline-3-carbaldehyde (3b)

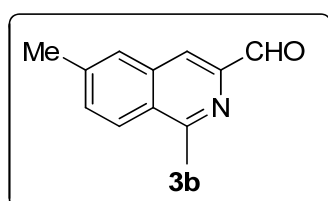

White solid; m.p. 68-72 °C;  $^1\text{H}$  NMR ( $\text{CDCl}_3$ , 400MHz),  $\delta$ : 10.19 (s, 1H), 8.15 (s, 1H), 8.08 (d,  $J = 8.4$  Hz, 1H), 7.75 (s, 1H), 7.59 (dd,  $J_1 = 8.8$  Hz,  $J_2 = 1.6$  Hz, 1H), 3.01 (s, 3H), 2.58 (s, 3H);  $^{13}\text{C}$  NMR ( $\text{CDCl}_3$ , 100MHz),  $\delta$ : 193.81, 159.60, 146.03, 141.56, 135.70, 132.34, 128.44, 128.11, 125.84,

120.95, 22.51, 21.96; IR (KBr)  $\nu$ : 3061, 2963, 2916, 2853, 1692, 1583, 1499, 1393, 1323, 1262, 1150, 800, 687, 610  $\text{cm}^{-1}$ ; HRMS (EI) ( $m/z$ ): calcd for  $\text{C}_{12}\text{H}_{11}\text{NO}$  ( $\text{M}^+$ ):185.0841; Found: 185.0840.

### 6-(Benzyloxy)-1-methylisoquinoline-3-carbaldehyde (3c)

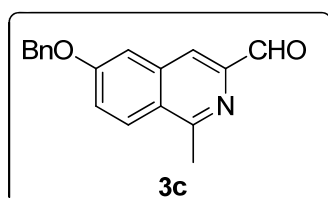

White solid; m.p. 105-112  $^{\circ}\text{C}$ ;  $^1\text{H}$  NMR ( $\text{CDCl}_3$ , 400MHz),  $\delta$ : 10.18 (s, 1H), 8.11-8.09 (m, 2H), 7.49-7.29 (m, 7H), 5.23(s, 2H), 2.99 (s, 3H);  $^{13}\text{C}$  NMR ( $\text{CDCl}_3$ , 100MHz),  $\delta$ : 193.89, 160.32, 159.20, 146.47, 137.54, 135.93, 128.92, 125.36, 122.95, 120.41, 108.21, 70.51, 22.47; IR (KBr)  $\nu$ : 3423, 2962, 2361, 1707, 1618, 1500, 1414, 1232, 1189, 1138, 1007, 817, 714  $\text{cm}^{-1}$ ; HRMS (EI) ( $m/z$ ): calcd for  $\text{C}_{18}\text{H}_{15}\text{NO}_2$  ( $\text{M}^+$ ): 277.1103; Found: 277.1102.

### 6-Chloro-1-methylisoquinoline-3-carbaldehyde (3d)

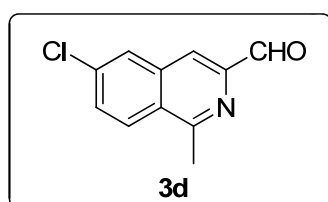

White solid; m.p. 127-131  $^{\circ}\text{C}$ ;  $^1\text{H}$  NMR ( $\text{CDCl}_3$ , 400MHz),  $\delta$ : 10.20 (s, 1H), 8.14-8.12 (m, 2H), 7.96 (d,  $J = 2$  Hz, 1H), 7.69 (dd,  $J_1 = 8.8$  Hz,  $J_2 = 2$  Hz, 1H), 3.03 (s, 3H);  $^{13}\text{C}$  NMR ( $\text{CDCl}_3$ , 100MHz),  $\delta$ : 193.45, 160.01, 146.76, 137.36, 136.43, 130.93, 128.11, 127.87, 127.72, 119.80, 22.59; IR (KBr)  $\nu$ : 3071, 2960, 2921, 2870, 1703, 1609, 1583, 1389, 1172, 1146, 1090, 913,

813, 764  $\text{cm}^{-1}$ ; HRMS (EI) ( $m/z$ ): calcd for  $\text{C}_{11}\text{H}_8\text{ClNO}$  ( $\text{M}^+$ ): 205.0294;  
Found: 205.0295.

### 6-Bromo-1-methylisoquinoline-3-carbaldehyde (3e)

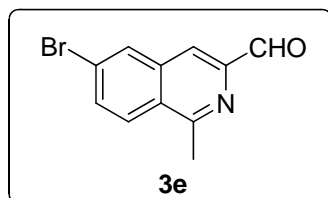

White solid; m.p. 139-142  $^{\circ}\text{C}$ ;  $^1\text{H}$  NMR ( $\text{CDCl}_3$ , 400MHz),  $\delta$ : 10.20 (s, 1H), 8.16 (d,  $J = 1.6$  Hz, 1H), 8.14 (s, 1H), 8.06 (d,  $J = 9.2$  Hz, 1H), 7.84 (dd,  $J_1 = 8.8$  Hz,  $J_2 = 2$  Hz, 1H), 3.04 (s, 3H);  $^{13}\text{C}$  NMR ( $\text{CDCl}_3$ , 100MHz),  $\delta$ : 193.46, 160.16, 146.72, 136.74, 133.52, 131.48, 128.10, 127.67, 125.86, 119.68, 22.57; IR (KBr)  $\nu$ : 2962, 2919, 2850, 1702, 1656, 1390, 1147, 994, 902, 810, 577, 506  $\text{cm}^{-1}$ ; HRMS (EI) ( $m/z$ ): calcd for  $\text{C}_{11}\text{H}_8\text{BrNO}$  ( $\text{M}^+$ ): 248.9789; Found: 248.9790.

### 1-Methyl-6-nitroisoquinoline-3-carbaldehyde (3f)

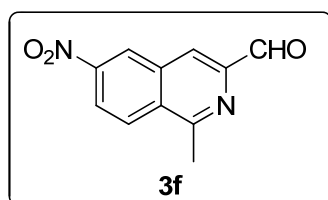

White solid; m.p. 173-180  $^{\circ}\text{C}$ ;  $^1\text{H}$  NMR ( $\text{CDCl}_3$ , 400MHz),  $\delta$ : 10.26 (s, 1H), 8.91 (d,  $J = 2.4$  Hz, 1H), 8.51 (dd,  $J_1 = 9.2$  Hz,  $J_2 = 2.4$  Hz, 1H), 8.40-8.38 (m, 2H), 3.13 (s, 3H);  $^{13}\text{C}$  NMR ( $\text{CDCl}_3$ , 100MHz),  $\delta$ : 192.97, 160.60, 148.68, 147.41, 135.22, 131.29, 128.25, 125.39, 123.25, 121.13, 22.88; IR (KBr)  $\nu$ : 3109, 2962, 2923, 2865, 1704, 1623, 1538, 1375, 1349, 1147,



1092, 836, 737  $\text{cm}^{-1}$ ; HRMS (EI) ( $m/z$ ): calcd for  $\text{C}_{11}\text{H}_8\text{N}_2\text{O}_3$  ( $\text{M}^+$ ): 216.0535; Found: 216.0534.

***tert*-Butyl (3-formyl-1-methylisoquinolin-6-yl)carbamate (3g)**

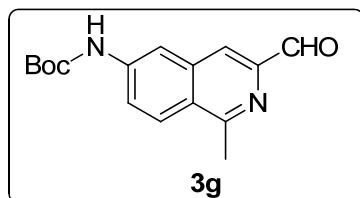

White solid; m.p. 170-173 °C;  $^1\text{H}$  NMR ( $\text{CDCl}_3$ , 400MHz),  $\delta$ : 10.17 (s, 1H), 8.12-8.08 (m, 3H), 7.64 (dd,  $J_1 = 9.2$  Hz,  $J_2 = 2.4$  Hz, 1H), 7.01 (s, 1H), 2.98 (s, 3H), 1.56 (s, 9H);  $^{13}\text{C}$  NMR ( $\text{CDCl}_3$ , 100MHz),  $\delta$ : 193.67, 159.38, 152.48, 146.41, 140.67, 136.76, 127.20, 126.01, 122.42, 121.24, 114.74, 28.41, 27.22, 22.35; IR (KBr)  $\nu$ : 3631, 2977, 2358, 1695, 1656, 1399, 1241, 1156, 883, 818, 701, 686  $\text{cm}^{-1}$ ; HRMS (EI) ( $m/z$ ): calcd for  $\text{C}_{16}\text{H}_{18}\text{N}_2\text{O}_3$  ( $\text{M}^+$ ): 286.1317; Found: 286.1317.

**7-Methoxy-1-methylisoquinoline-3-carbaldehyde (3ha)**

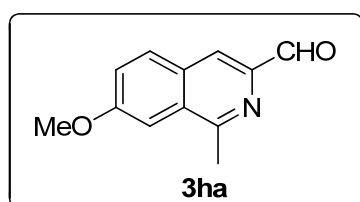

White solid; m.p. 100-104 °C;  $^1\text{H}$  NMR ( $\text{CDCl}_3$ , 400MHz),  $\delta$ : 10.19 (s, 1H), 8.64 (s, 1H), 7.73-7.65 (m, 2H), 7.08 (dd,  $J_1 = 7.2$  Hz,  $J_2 = 2.4$  Hz, 1H), 4.04 (s, 3H), 3.01 (s, 3H);  $^{13}\text{C}$  NMR ( $\text{CDCl}_3$ , 100MHz),  $\delta$ : 193.47, 159.35, 156.71, 145.42, 130.59, 130.46, 127.95, 117.57, 116.79, 108.48, 56.00, 22.97; IR (KBr)  $\nu$ : 3022, 2957, 2924, 2850, 2368, 1691, 1615, 1584, 1496,

1387, 1368, 1323, 1267, 893, 804, 740  $\text{cm}^{-1}$ ; HRMS (EI) ( $m/z$ ): calcd for  $\text{C}_{12}\text{H}_{11}\text{NO}_2$  ( $\text{M}^+$ ): 201.0790; Found: 201.0794.

### 5-Methoxy-1-methylisoquinoline-3-carbaldehyde (3hb)

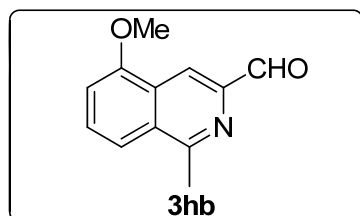

White solid; m.p. 132-137  $^{\circ}\text{C}$   $^1\text{H}$  NMR ( $\text{CDCl}_3$ , 400MHz),  $\delta$ : 10.18 (s, 1H), 8.19 (s, 1H), 7.92 (d,  $J = 8.8$  Hz, 1H), 7.43 (dd,  $J_1 = 8.8$  Hz,  $J_2 = 2.4$  Hz, 1H), 7.38 (d,  $J = 2.4$  Hz, 1H), 4.01 (s, 3H), 3.00 (s, 3H);  $^{13}\text{C}$  NMR ( $\text{CDCl}_3$ , 100MHz),  $\delta$ : 192.39, 159.71, 156.84, 143.47, 130.20, 130.01, 129.43, 122.37, 120.06, 103.10, 54.64, 21.58; IR (KBr)  $\nu$ : 2963, 2921, 2361, 2026, 1625, 1499, 1405, 1261, 1089, 1029, 800, 679  $\text{cm}^{-1}$ ; HRMS (EI) ( $m/z$ ): calcd for  $\text{C}_{12}\text{H}_{11}\text{NO}_2$  ( $\text{M}^+$ ): 201.0790; Found: 201.0786.

### 1-Ethylisoquinoline-3-carbaldehyde (3i)

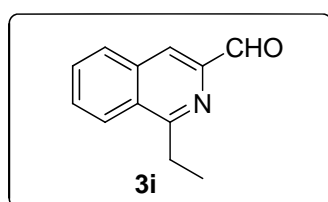

White solid; m.p. 63-67  $^{\circ}\text{C}$ ;  $^1\text{H}$  NMR ( $\text{CDCl}_3$ , 400MHz),  $\delta$ : 10.23 (s, 1H), 8.23-8.22 (m, 2H), 8.00-7.98 (m, 1H), 7.77-7.74 (m, 2H), 3.39 (q,  $J = 7.6$  Hz, 2H), 1.48 (t,  $J = 7.6$  Hz, 3H);  $^{13}\text{C}$  NMR ( $\text{CDCl}_3$ , 100MHz),  $\delta$ : 194.06, 164.34, 145.96, 135.70, 130.77, 129.99, 129.69, 128.91, 125.57, 120.65, 28.65, 13.63; IR (KBr)  $\nu$ : 3068, 2974, 2937, 2881, 2827, 1704, 1503, 1444,

1385, 1126, 750, 722  $\text{cm}^{-1}$ ; HRMS (EI) ( $m/z$ ): calcd for  $\text{C}_{12}\text{H}_{11}\text{NO}$  ( $\text{M}^+$ ): 185.0841; Found: 185.0838.

### 1-Benzylisoquinoline-3-carbaldehyde(3j)

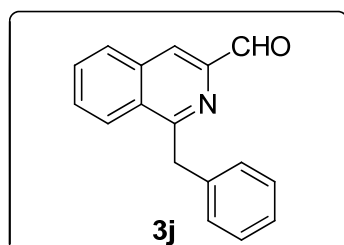

Yellow solid; m.p. 80-86  $^{\circ}\text{C}$ ;  $^1\text{H}$  NMR ( $\text{CDCl}_3$ , 400MHz),  $\delta$ : 10.28 (s, 1H), 8.30 (s, 1H), 8.21 (d,  $J = 8.4$  Hz, 1H), 8.00 (d,  $J = 8$  Hz, 1H), 7.75-7.66 (m, 2H), 7.33-7.17 (m, 5H), 4.76 (s, 2H);  $^{13}\text{C}$  NMR ( $\text{CDCl}_3$ , 100MHz),  $\delta$ : 193.96, 161.32, 146.00, 138.90, 136.13, 130.92, 130.25, 129.69, 129.40, 128.74, 128.70, 126.62, 126.28, 121.26, 42.17; IR (KBr)  $\nu$ : 3058, 3023, 2925, 2873, 1697, 1583, 1494, 1452, 1126, 1026, 912, 749, 709  $\text{cm}^{-1}$ ; HRMS (EI) ( $m/z$ ): calcd for  $\text{C}_{17}\text{H}_{13}\text{NO}$  ( $\text{M}^+$ ): 247.0997; Found: 247.0995.

### 1-(4-Methoxyphenethyl)isoquinoline-3-carbaldehyde (3k)

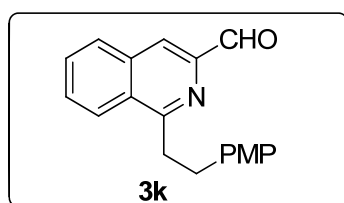

White solid; m.p. 77-79  $^{\circ}\text{C}$ ;  $^1\text{H}$  NMR ( $\text{CDCl}_3$ , 400MHz),  $\delta$ : 10.26 (s, 1H), 8.25 (s, 1H), 8.21-8.19 (m, 1H), 8.01 (dd,  $J_1 = 6$  Hz,  $J_2 = 2$  Hz, 1H), 7.77-7.73 (m, 2H), 7.25-7.22 (m, 2H), 6.86-6.84 (m, 2H), 3.80 (s, 3H), 3.64 (t,  $J = 2$  Hz, 2H), 3.20 (t,  $J = 2$  Hz, 2H);  $^{13}\text{C}$  NMR ( $\text{CDCl}_3$ , 100MHz),  $\delta$ : 194.06, 162.27, 158.13, 145.98, 135.73, 133.76, 130.82, 130.08, 129.72, 129.52,

129.19, 125.46, 120.76, 114.01, 55.40, 37.41, 34.31; IR (KBr)  $\nu$ : 3004, 2929, 2830, 2809, 2367, 1703, 1613, 1583, 1511, 1446, 1386, 1238, 1177, 1032, 816, 746, 721  $\text{cm}^{-1}$ ; HRMS (EI) ( $m/z$ ): calcd for  $\text{C}_{19}\text{H}_{17}\text{NO}_2$  ( $\text{M}^+$ ):291.1259; Found: 291.1264.

### 1-(Tosylmethyl)isoquinoline-3-carbaldehyde (3l)

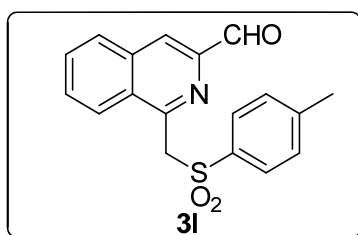

White solid; m.p. 196-197 °C;  $^1\text{H}$  NMR ( $\text{CDCl}_3$ , 400MHz),  $\delta$ : 9.87 (s, 1H), 8.38-8.35 (m, 1H), 8.31 (s, 1H), 8.05-8.03 (m, 1H), 7.87-7.83 (m, 2H), 7.87-7.81 (m, 2H), 7.23-7.13 (m, 2H), 5.15 (s, 2H), 2.41 (s, 3H);  $^{13}\text{C}$  NMR ( $\text{CDCl}_3$ , 100MHz),  $\delta$ : 193.10, 150.44, 145.85, 145.21, 136.24, 135.27, 131.57, 130.96, 130.24, 129.67, 129.59, 128.82, 126.39, 121.73, 62.23, 21.77; IR (KBr)  $\nu$ : 3432, 2993, 2815, 2367, 2026, 1696, 1638, 1501, 1408, 1383, 1307, 1147, 1087, 685, 648  $\text{cm}^{-1}$ ; HRMS (EI) ( $m/z$ ): calcd for  $\text{C}_{18}\text{H}_{15}\text{NO}_3\text{S}$  ( $\text{M}^+$ ): 325.0773; Found: 325.0773.

### 1-Phenylisoquinoline-3-carbaldehyde (3m)

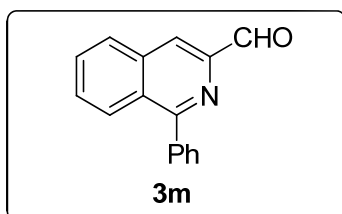

White solid; m.p. 133-135 °C;  $^1\text{H}$  NMR ( $\text{CDCl}_3$ , 400MHz),  $\delta$ : 10.33 (s, 1H), 8.40 (s, 1H), 8.17 (dd,  $J_1 = 8.4$  Hz,  $J_2 = 0.8$  Hz, 1H), 8.09 (d,  $J = 8$  Hz,

1H), 7.83-7.79 (m, 1H), 7.75-7.69 (m, 3H), 7.61-7.55 (m, 3H); <sup>13</sup>C NMR (CDCl<sub>3</sub>, 100MHz), δ: 194.20, 161.77, 146.17, 138.84, 136.54, 131.09, 130.16, 130.06, 129.36, 129.28, 129.01, 128.73, 128.04, 120.44; IR (KBr) ν: 3056, 2925, 2847, 2361, 1707, 1579, 1559, 1491, 1444, 1388, 1374, 1158, 1129, 931, 905, 770 cm<sup>-1</sup>; HRMS (EI) (*m/z*): calcd for C<sub>16</sub>H<sub>11</sub>NO (M<sup>+</sup>): 233.0841; Found: 233.0838.

### 1-Benzoylisoquinoline-3-carbaldehyde (3n)

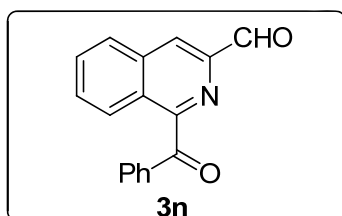

White solid; m.p. 117-119 °C; <sup>1</sup>H NMR (CDCl<sub>3</sub>, 400MHz), δ: 10.24 (s, 1H), 8.54 (s, 1H), 8.22 (dd, *J*<sub>1</sub> = 8.4 Hz, *J*<sub>2</sub> = 0.8 Hz, 1H), 8.13 (d, *J* = 8 Hz, 1H), 7.99-7.97 (m, 2H), 7.88-7.84 (m, 1H), 7.80-7.76 (m, 1H), 7.67-7.63 (m, 1H), 7.52-7.48 (m, 2H); <sup>13</sup>C NMR (CDCl<sub>3</sub>, 100MHz), δ: 194.17, 193.26, 157.48, 145.21, 136.42, 136.13, 134.28, 131.82, 131.15, 130.94, 129.45, 128.75, 128.34, 126.63, 122.49; IR (KBr) ν: 3068, 2931, 2832, 1709, 1666, 1597, 1448, 1290, 1244, 1162, 976, 908, 757, 744 cm<sup>-1</sup>; HRMS (EI) (*m/z*): calcd for C<sub>17</sub>H<sub>11</sub>NO<sub>2</sub> (M<sup>+</sup>): 261.0790; Found: 261.0791.

### Methyl 3-formylisoquinoline-1-carboxylate (3o)

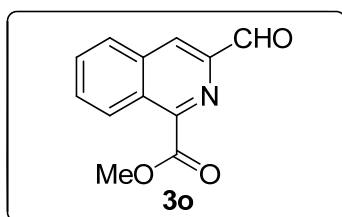

White solid; m.p. 105-108 °C;  $^1\text{H}$  NMR ( $\text{CDCl}_3$ , 400MHz),  $\delta$ : 10.30 (s, 1H), 8.79-8.76 (m, 1H), 8.52 (d,  $J = 0.8$  Hz, 1H), 8.08-8.06 (m, 1H), 7.85-7.83 (m, 2H), 4.13 (s, 3H);  $^{13}\text{C}$  NMR ( $\text{CDCl}_3$ , 100MHz),  $\delta$ : 192.85, 165.91, 149.66, 145.42, 136.69, 131.73, 131.58, 129.43, 128.55, 126.82, 123.94, 53.45; IR (KBr)  $\nu$ : 3428, 2959, 2856, 2026, 1720, 1701, 1500, 1444, 1292, 1249, 1206, 1157, 1127, 1037, 1020, 746, 738  $\text{cm}^{-1}$ ; HRMS (EI) ( $m/z$ ): calcd for  $\text{C}_{12}\text{H}_9\text{NO}_3$  ( $\text{M}^+$ ): 215.0582; Found: 215.0585.

### 8,9-Dihydro-7H-benzo[de]quinoline-2-carbaldehyde (3p)

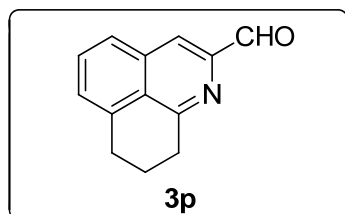

White solid; m.p. 98-102 °C;  $^1\text{H}$  NMR ( $\text{CDCl}_3$ , 400MHz),  $\delta$ : 10.20 (s, 1H), 8.19 (s, 1H), 7.81 (d,  $J = 8.0$  Hz, 1H), 7.69-7.65 (m, 1H), 7.51 (d,  $J = 6.8$  Hz, 1H), 3.34 (t,  $J = 6.4$  Hz, 2H), 3.17 (t,  $J = 6.0$  Hz, 2H), 2.23 (m,  $J = 6.4$  Hz, 2H);  $^{13}\text{C}$  NMR ( $\text{CDCl}_3$ , 100MHz),  $\delta$ : 193.72, 161.58, 145.75, 139.28, 135.58, 131.04, 128.31, 127.35, 126.69, 121.24, 34.43, 30.45, 23.21; IR (KBr)  $\nu$ : 2925, 2338, 2027, 1690, 1586, 1492, 1413, 1348, 1153, 776, 731  $\text{cm}^{-1}$ ; HRMS (EI) ( $m/z$ ): calcd for  $\text{C}_{13}\text{H}_{11}\text{NO}$  ( $\text{M}^+$ ): 197.0841; Found: 197.0841.

### Methyl 1-methylisoquinoline-3-carboxylate (3q)

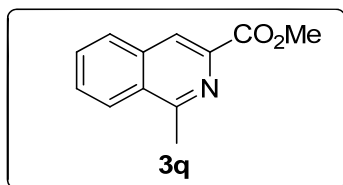

White solid; m.p. 93-96 °C;  $^1\text{H}$  NMR ( $\text{CDCl}_3$ , 400MHz),  $\delta$ : 8.46 (s, 1H), 8.19-8.17 (m, 1H), 7.96-7.93 (m, 1H), 7.78-7.71 (m, 2H), 4.04 (s, 3H), 3.04 (s, 3H);  $^{13}\text{C}$  NMR ( $\text{CDCl}_3$ , 100MHz),  $\delta$ : 166.67, 159.52, 140.48, 135.59, 130.84, 129.56, 129.10, 128.86, 125.93, 123.17, 53.02, 22.85; IR (KBr)  $\nu$ : 3061, 2996, 2955, 2364, 1733, 1498, 1385, 1288, 1247, 1210, 1155, 811, 749  $\text{cm}^{-1}$ ; HRMS (EI) ( $m/z$ ): calcd for  $\text{C}_{12}\text{H}_{11}\text{NO}_2$  ( $\text{M}^+$ ): 201.0790; Found: 201.0791.

***tert*-Butyl 1-methylisoquinoline-3-carboxylate(3r)**

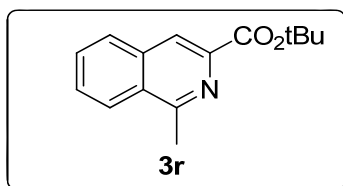

Pale yellow solid; m.p. 92-95 °C;  $^1\text{H}$  NMR ( $\text{CDCl}_3$ , 400MHz),  $\delta$ : 8.31 (s, 1H), 8.16 (d,  $J = 8.0$  Hz, 1H), 7.93-7.91(m, 1H), 7.75-7.67 (m, 1H), 3.03 (s, 3H), 1.66 (s, 9H);  $^{13}\text{C}$  NMR ( $\text{CDCl}_3$ , 100MHz),  $\delta$ : 164.91, 159.41, 141.74, 135.65, 130.60, 129.20, 128.88, 128.71, 125.88, 122.31, 81.89, 28.31, 22.79; IR (KBr)  $\nu$ : 3009, 2977, 2927, 2870, 2371, 1712, 1567, 1444, 1391, 1249, 1159, 1106, 979, 798, 767  $\text{cm}^{-1}$ ; HRMS (EI) ( $m/z$ ): calcd for  $\text{C}_{15}\text{H}_{17}\text{NO}_2$  ( $\text{M}^+$ ): 243.1259; Found: 243.1257.

**1-Methyl-*N*-phenylisoquinoline-3-carboxamide (3s)**

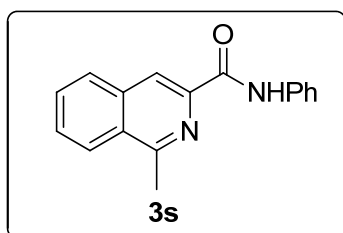

White solid; m.p. 160-163 °C;  $^1\text{H}$  NMR ( $\text{CDCl}_3$ , 400MHz),  $\delta$ : 10.32 (s, 1H), 8.56 (s, 1H), 8.18-8.16 (m, 1H), 7.99 (d,  $J = 7.2$  Hz, 1H), 7.86-7.84 (m, 2H), 7.77-7.68 (m, 2H), 7.43-7.39 (m, 2H), 7.18-7.14 (m, 1H), 3.03 (s, 3H);  $^{13}\text{C}$  NMR ( $\text{CDCl}_3$ , 100MHz),  $\delta$ : 162.89, 157.77, 142.20, 138.15, 136.25, 130.83, 129.17, 129.04, 128.97, 128.82, 125.90, 124.25, 119.86, 119.58, 22.60; IR (KBr)  $\nu$ : 3333, 3061, 1683, 1599, 1435, 1311, 1194, 1024, 785, 768, 748, 689, 593  $\text{cm}^{-1}$ ; HRMS (EI) ( $m/z$ ): calcd for  $\text{C}_{17}\text{H}_{14}\text{N}_2\text{O}$  ( $\text{M}^+$ ): 262.1106; Found: 262.1103.

***N*-(4-methoxyphenyl)-1-methylisoquinoline-3-carboxamide (3t)**

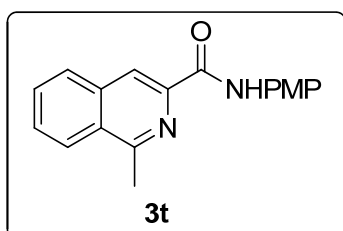

White solid; m.p. 117-120 °C;  $^1\text{H}$  NMR ( $\text{CDCl}_3$ , 400MHz),  $\delta$ : 10.20 (s, 1H), 8.54(s, 1H), 8.16 (d.  $J = 8$  Hz, 1H), 7.97 (d.  $J = 8$  Hz, 1H), 7.78-7.66 (m, 4H), 6.96-6.92 (m, 2H), 3.82 (s, 3H), 3.01 (s, 3H);  $^{13}\text{C}$  NMR ( $\text{CDCl}_3$ , 100MHz),  $\delta$ : 162.61, 157.70, 156.37, 142.33, 136.25, 131.45, 130.77, 128.99, 128.88, 128.74, 125.88, 121.40, 119.36, 114.40, 55.60, 22.57; IR (KBr)  $\nu$ : 3351, 2993, 2921, 2838, 2365, 1672, 1610, 1568, 1523, 1410, 1246, 1184, 1034, 830, 811, 752  $\text{cm}^{-1}$ ; HRMS (EI) ( $m/z$ ): calcd for



C<sub>18</sub>H<sub>16</sub>N<sub>2</sub>O<sub>2</sub> (M<sup>+</sup>): 292.1212; Found: 292.1213.

### 1-(1-Methylisoquinolin-3-yl)ethan-1-one (3u)

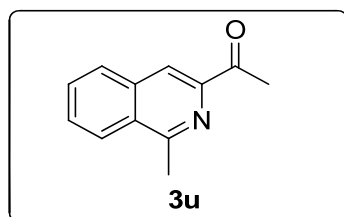

White solid; m.p. 70-73 °C; <sup>1</sup>H NMR (CDCl<sub>3</sub>, 400MHz), δ: 8.31 (s, 1H), 8.16-8.14 (m, 1H), 7.96-7.94 (m, 1H), 7.75-7.68 (m, 2H), 3.00 (s, 3H), 2.82 (s, 3H); <sup>13</sup>C NMR (CDCl<sub>3</sub>, 100MHz), δ: 200.96, 158.47, 146.69, 135.62, 130.53, 129.48, 129.30, 129.16, 125.75, 119.12, 26.56, 22.73; IR (KBr) ν: 3440, 2922, 2860, 2337, 1684, 1618, 1578, 1499, 1445, 1390, 1352, 1283, 1234, 1196, 757, 589 cm<sup>-1</sup>; HRMS (EI) (*m/z*): calcd for C<sub>12</sub>H<sub>11</sub>NO (M<sup>+</sup>): 185.0841; Found: 185.0844.

### 1-(1-Methylisoquinolin-3-yl)-3-phenylpropan-1-one (3v)

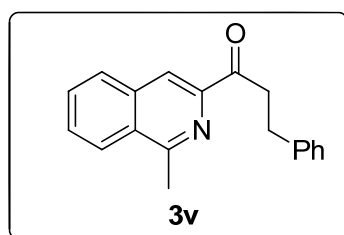

White solid; m.p. 78-81 °C; <sup>1</sup>H NMR (CDCl<sub>3</sub>, 400MHz), δ: 8.33 (s, 1H), 8.17-8.15 (m, 1H), 7.97 (dd, *J*<sub>1</sub> = 5.6 Hz, *J*<sub>2</sub> = 1.2 Hz, 1H), 7.75-7.69 (m, 2H), 7.34-7.29 (m, 4H), 7.22-7.19 (m, 1H), 3.68 (t, *J* = 6.4 Hz, 2H), 3.12 (t, *J* = 6.4 Hz, 2H), 2.99 (s, 3H); <sup>13</sup>C NMR (CDCl<sub>3</sub>, 100MHz), δ: 201.82, 158.42, 146.43, 141.97, 135.71, 130.52, 129.51, 129.26, 128.69, 128.54, 126.05, 125.77, 119.13, 40.43, 30.38, 22.72; IR (KBr) ν: 3440, 2981, 2918,

2856, 2362, 1687, 1618, 1562, 1496, 1442, 1392, 1377, 1168, 1133, 1058, 1024, 787, 754  $\text{cm}^{-1}$ ; HRMS (EI) ( $m/z$ ): calcd for  $\text{C}_{19}\text{H}_{17}\text{NO}$  ( $\text{M}^+$ ): 275.1310; Found: 275.1314.

**Furan-2-yl(1-methylisoquinolin-3-yl)methanone (3w)**

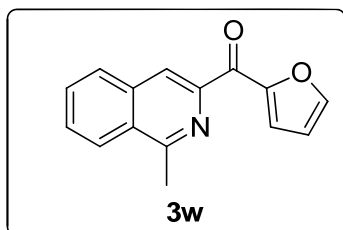

White solid; m.p. 117-119  $^{\circ}\text{C}$ ;  $^1\text{H}$  NMR ( $\text{CDCl}_3$ , 400MHz),  $\delta$ : 8.49 (s, 1H), 8.26 (d,  $J = 3.2$  Hz, 1H), 8.18-8.16 (m, 1H), 7.99-7.97 (m, 1H), 7.77-7.72 (m, 3H), 6.64 (dd,  $J_1 = 3.6$  Hz,  $J_2 = 1.6$  Hz, 1H), 3.05 (s, 3H);  $^{13}\text{C}$  NMR ( $\text{CDCl}_3$ , 100MHz),  $\delta$ : 179.57, 158.19, 151.93, 147.52, 146.72, 135.78, 130.68, 129.46, 129.30, 128.97, 125.74, 124.36, 121.66, 112.48, 22.72; IR (KBr)  $\nu$ : 3115, 2922, 2362, 1638, 1618, 1578, 1501, 1462, 1401, 1338, 1293, 1261, 802, 776, 742  $\text{cm}^{-1}$ ; HRMS (EI) ( $m/z$ ): calcd for  $\text{C}_{15}\text{H}_{11}\text{NO}_2$  ( $\text{M}^+$ ): 237.0790; Found: 237.0796.

**Methyl (1-methylisoquinolin-3-yl)(thiophen-2-yl)methanone (3x)**

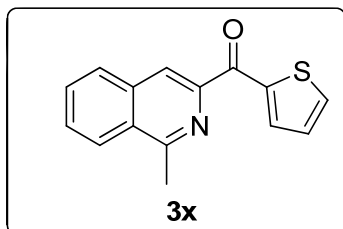

White solid; m.p. 106-108  $^{\circ}\text{C}$ ;  $^1\text{H}$  NMR ( $\text{CDCl}_3$ , 400MHz),  $\delta$ : 8.49-8.48 (m, 2H), 8.19-8.17 (m, 1H), 8.00-7.98 (m, 1H), 7.77-7.71 (m, 3H), 7.21-7.20 (m, 1H), 3.08(s, 3H);  $^{13}\text{C}$  NMR ( $\text{CDCl}_3$ , 100MHz),  $\delta$ : 183.78, 157.87,

146.58, 140.56, 136.58, 136.55, 135.95, 130.65, 129.44, 129.38, 129.03, 127.40, 125.72, 121.32, 22.18; IR (KBr)  $\nu$ : 2924, 2855, 2368, 1638, 1611, 1501, 1444, 1409, 1392, 1358, 1284, 1245, 1046, 783, 759, 713  $\text{cm}^{-1}$ ; HRMS (EI) ( $m/z$ ): calcd for  $\text{C}_{15}\text{H}_{11}\text{NOS}(\text{M}^+)$ : 253.0561; Found: 253.0560.

### 1-(1-Benzyl-6,7-dimethoxyisoquinolin-3-yl)ethan-1-one (8)

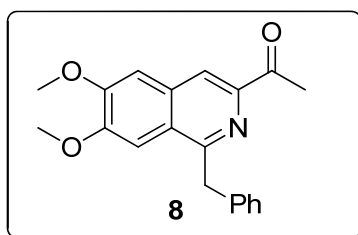

White solid; m.p. 143-145  $^{\circ}\text{C}$ ;  $^1\text{H}$  NMR ( $\text{CDCl}_3$ , 400MHz),  $\delta$ : 8.25 (s, 1H), 7.33-7.18 (m, 7H), 4.83 (s, 2H), 4.01 (s, 3H), 3.90 (s, 3H), 2.80 (s, 3H);  $^{13}\text{C}$  NMR ( $\text{CDCl}_3$ , 150MHz),  $\delta$ : 201.23, 157.11, 152.74, 151.65, 146.12, 139.46, 133.10, 128.79, 128.68, 126.52, 125.05, 118.34, 107.18, 104.35, 56.27, 56.11, 42.77, 26.43; IR (KBr)  $\nu$ : 3446, 2989, 2948, 2833, 1680, 1618, 1588, 1509, 1468, 1352, 1254, 1212, 1190, 1034, 888, 764, 749, 715  $\text{cm}^{-1}$ ; HRMS (EI) ( $m/z$ ): calcd for  $\text{C}_{20}\text{H}_{19}\text{NO}_3(\text{M}^+)$ : 321.1365; Found: 321.1365.

### 1-Benzyl-3-ethyl-6,7-dimethoxyisoquinoline (Moxaverine)

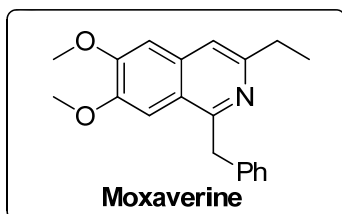

White solid; m.p. 65-67  $^{\circ}\text{C}$ ;  $^1\text{H}$  NMR ( $\text{CDCl}_3$ , 400MHz),  $\delta$ : 7.20-7.07 (m, 7H), 6.91 (s, 1H), 4.51 (s, 2H), 3.90 (s, 3H), 3.75 (s, 3H), 2.88 (q,  $J = 7.2$  Hz, 2H), 1.32 (t,  $J = 7.2$  Hz, 3H);  $^{13}\text{C}$  NMR ( $\text{CDCl}_3$ , 100MHz),  $\delta$ : 157.20,

154.95, 152.45, 149.18, 139.99, 134.37, 128.61, 128.57, 126.25, 121.18, 115.54, 105.04, 104.45, 56.05, 55.89, 42.93, 31.16, 14.43; IR (KBr)  $\nu$ : 3022, 2961, 2927, 1622, 1598, 1571, 1508, 1451, 1428, 1216, 1159, 1043, 1028, 875, 848, 749, 707  $\text{cm}^{-1}$ ; HRMS (EI) ( $m/z$ ): calcd for  $\text{C}_{20}\text{H}_{21}\text{NO}_2$  ( $\text{M}^+$ ): 307.1572; Found: 307.1572.

### 5. Kinetic Isotope Effect Study:

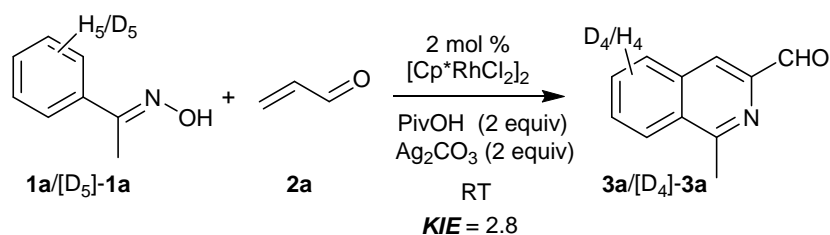

Following general procedure, a vial equipped with a stir bar was charged with **1a** (27.0 mg, 0.2 mmol), acrolein **2a** (33.6 mg, 0.6 mmol),  $[\text{Cp}^*\text{RhCl}_2]_2$  (2.5 mg, 2 mol %),  $\text{Ag}_2\text{CO}_3$  (110.3 mg, 0.4 mmol), PivOH (40.8 mg, 0.4 mmol), MeCN (1 mL). In another vial,  $[\text{D}_5]\text{-1a}$  (28.0 mg, 0.2 mmol) was used instead of **1a**. The two reactions were allowed to stir at room temperature for 3 h. Afterwards, the reactions were combined and the solvent was concentrated in vacuum and the residue was purified by flash column chromatography on silica gel using ethyl acetate/petroleum ether (v/v, 1:10) as eluent to give the product as a white solid (15 mg, 21.7% yield). The value of  $K_H/K_D$  was obtained based on  $^1\text{H}$ NMR.

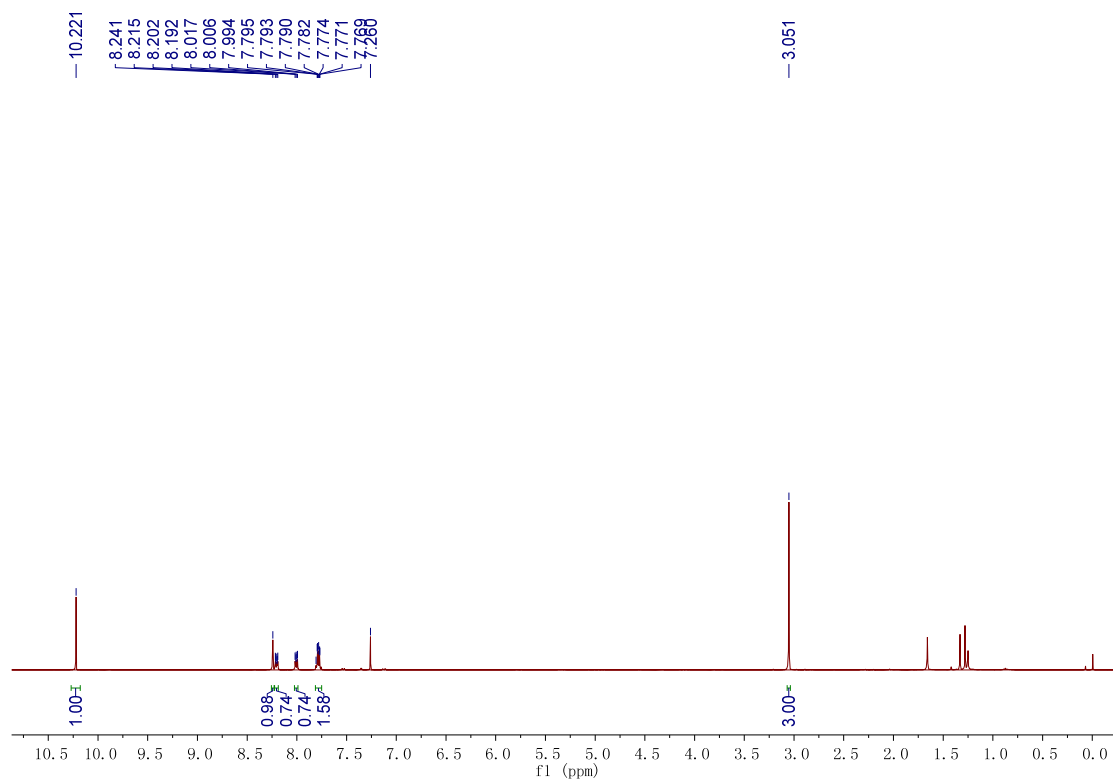

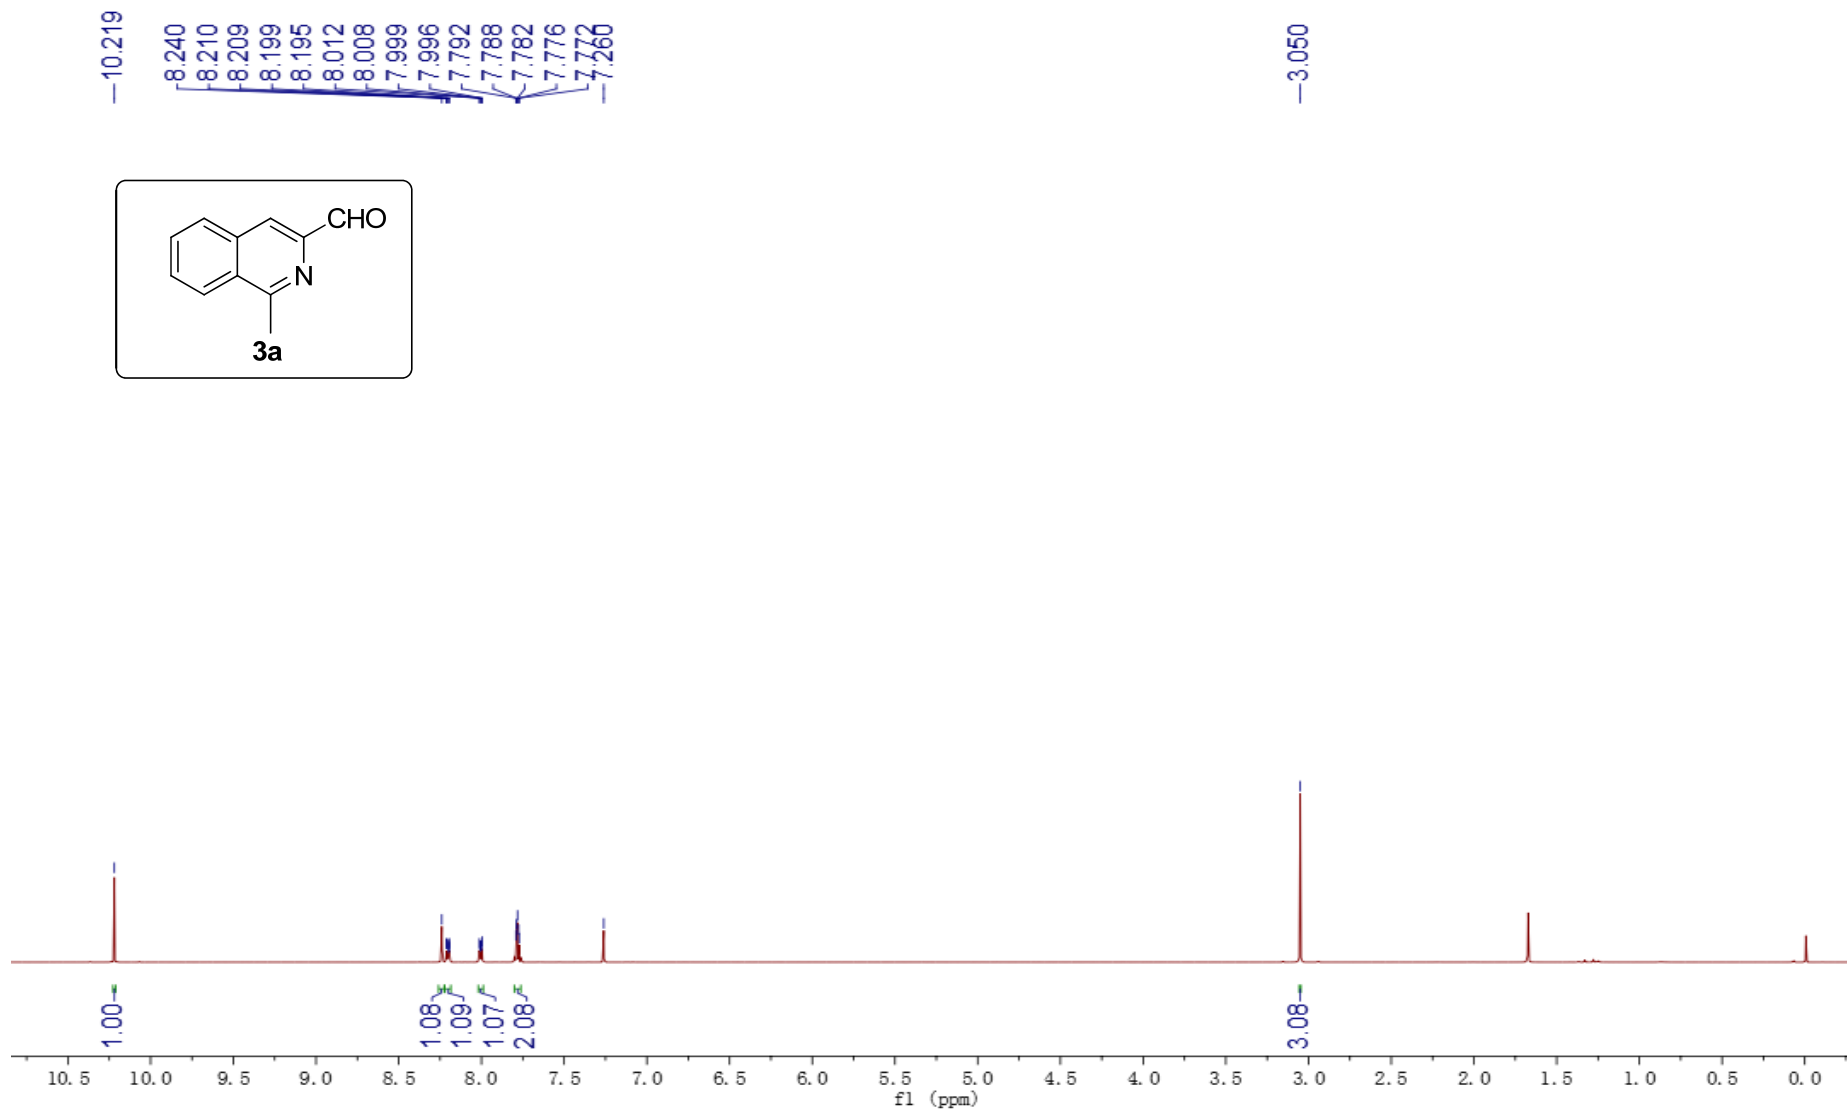

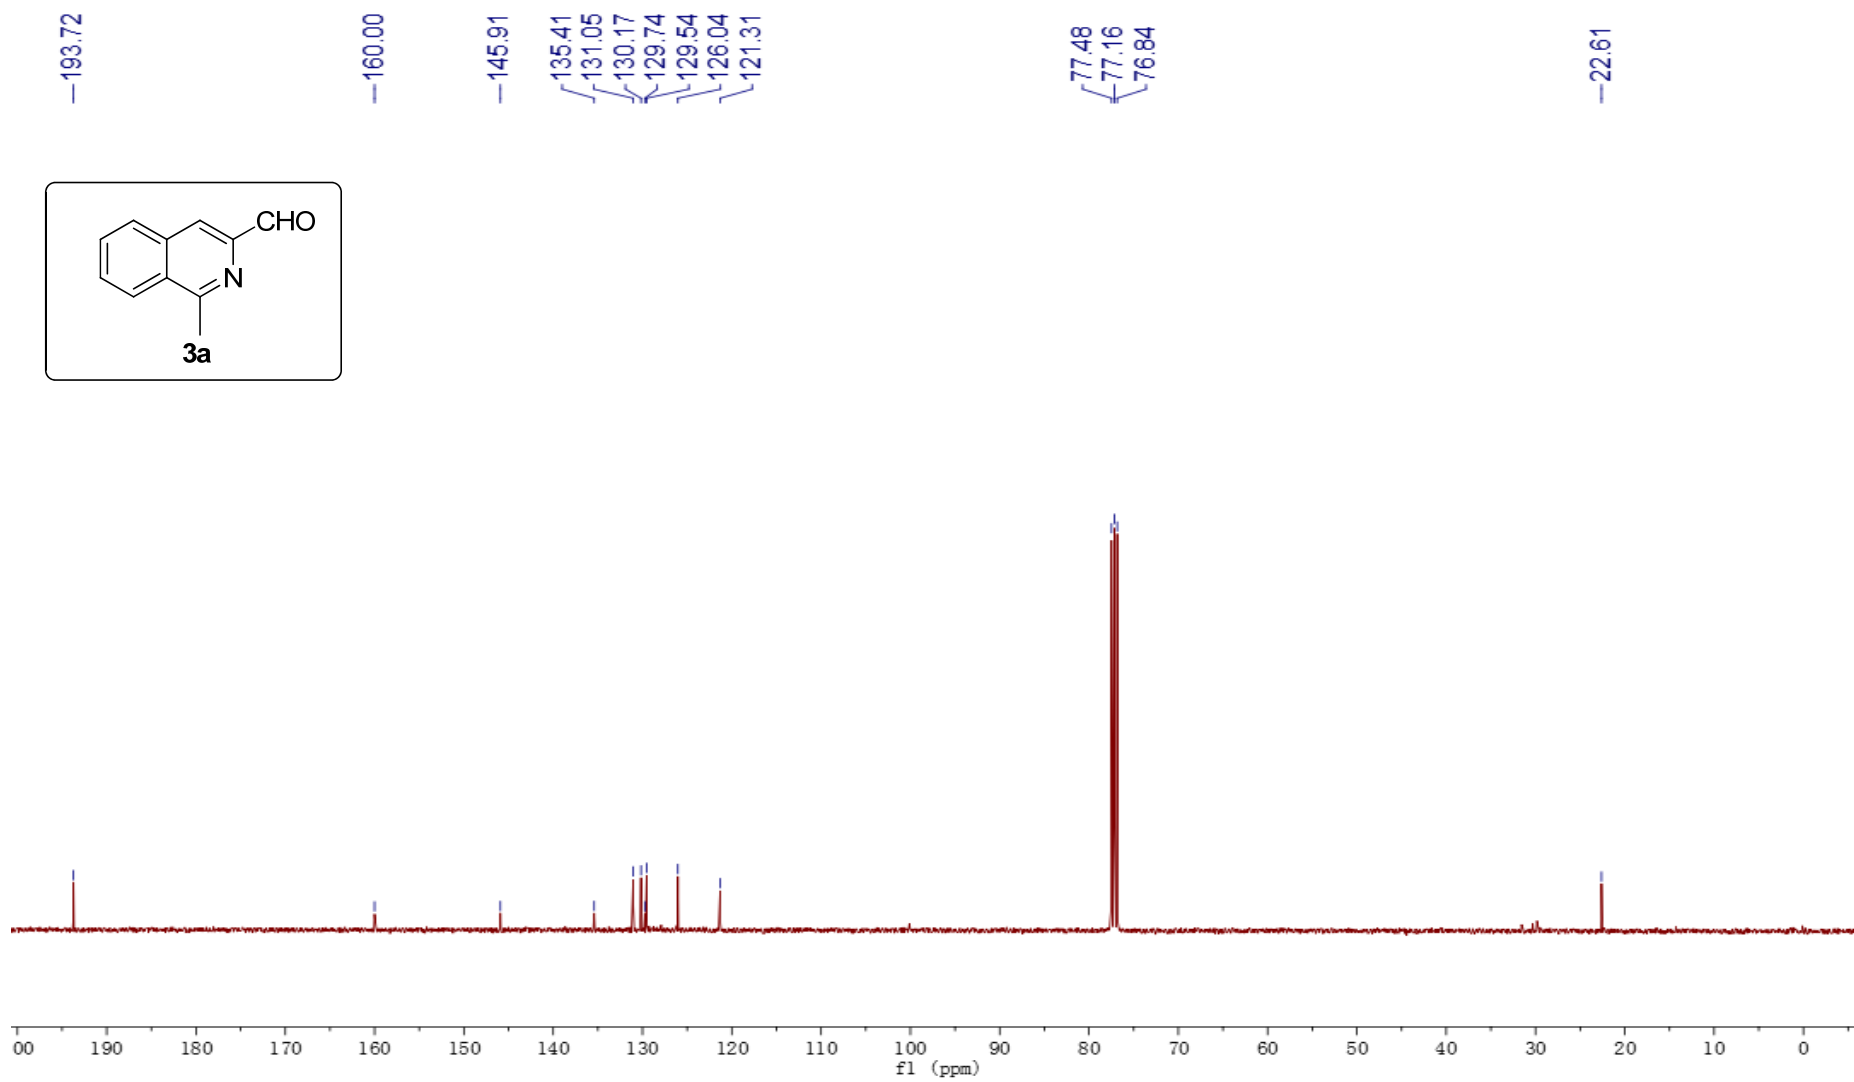

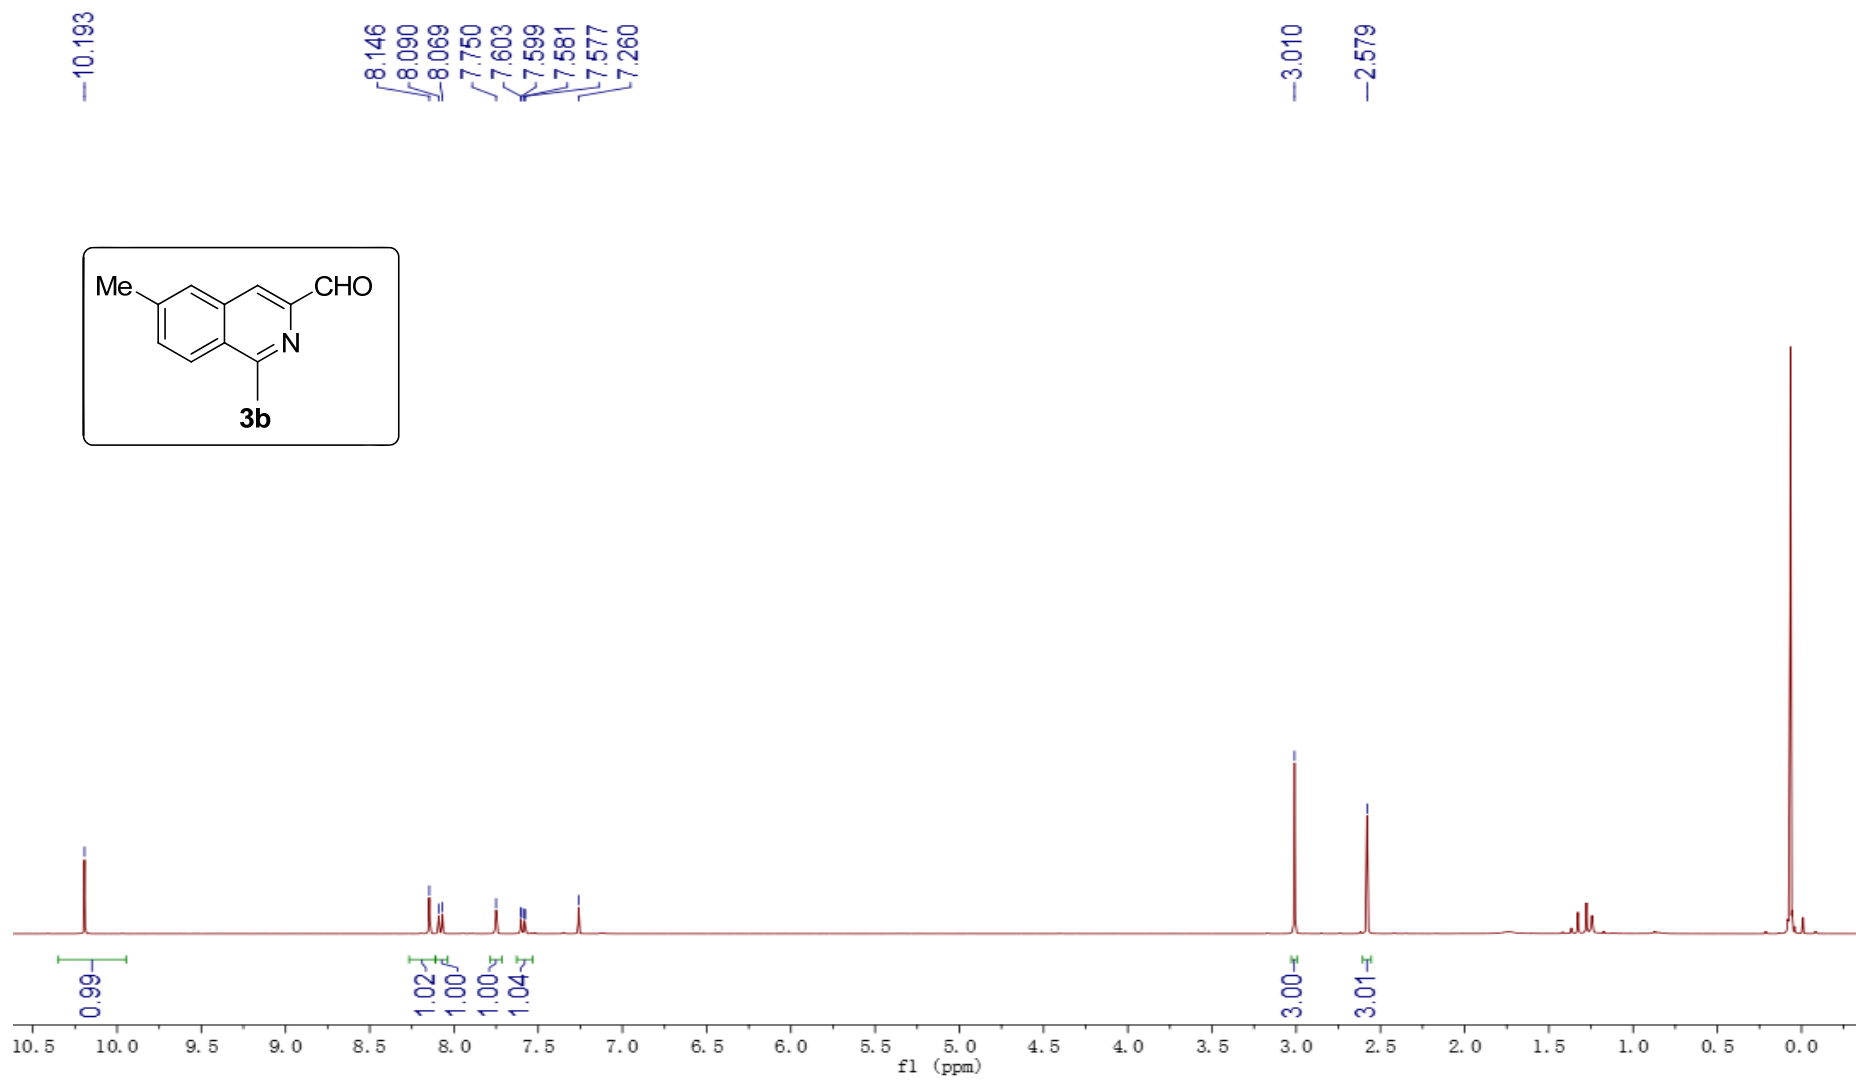



— 193.81

— 159.60

— 146.03

— 141.56

— 132.34

— 125.84

— 120.95

{ 77.48  
77.16  
76.84

{ 22.51  
21.96

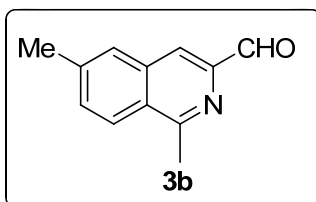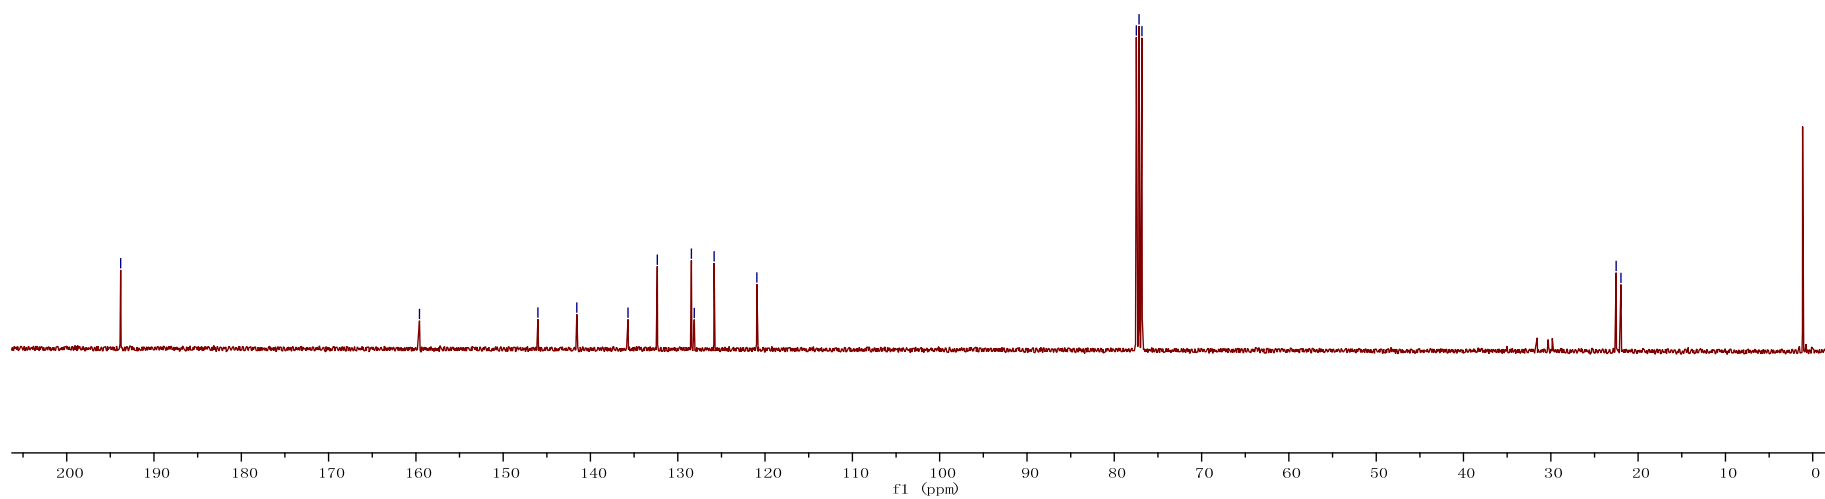

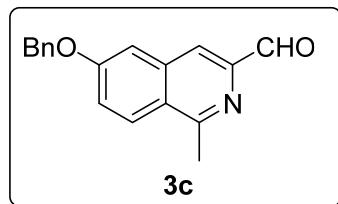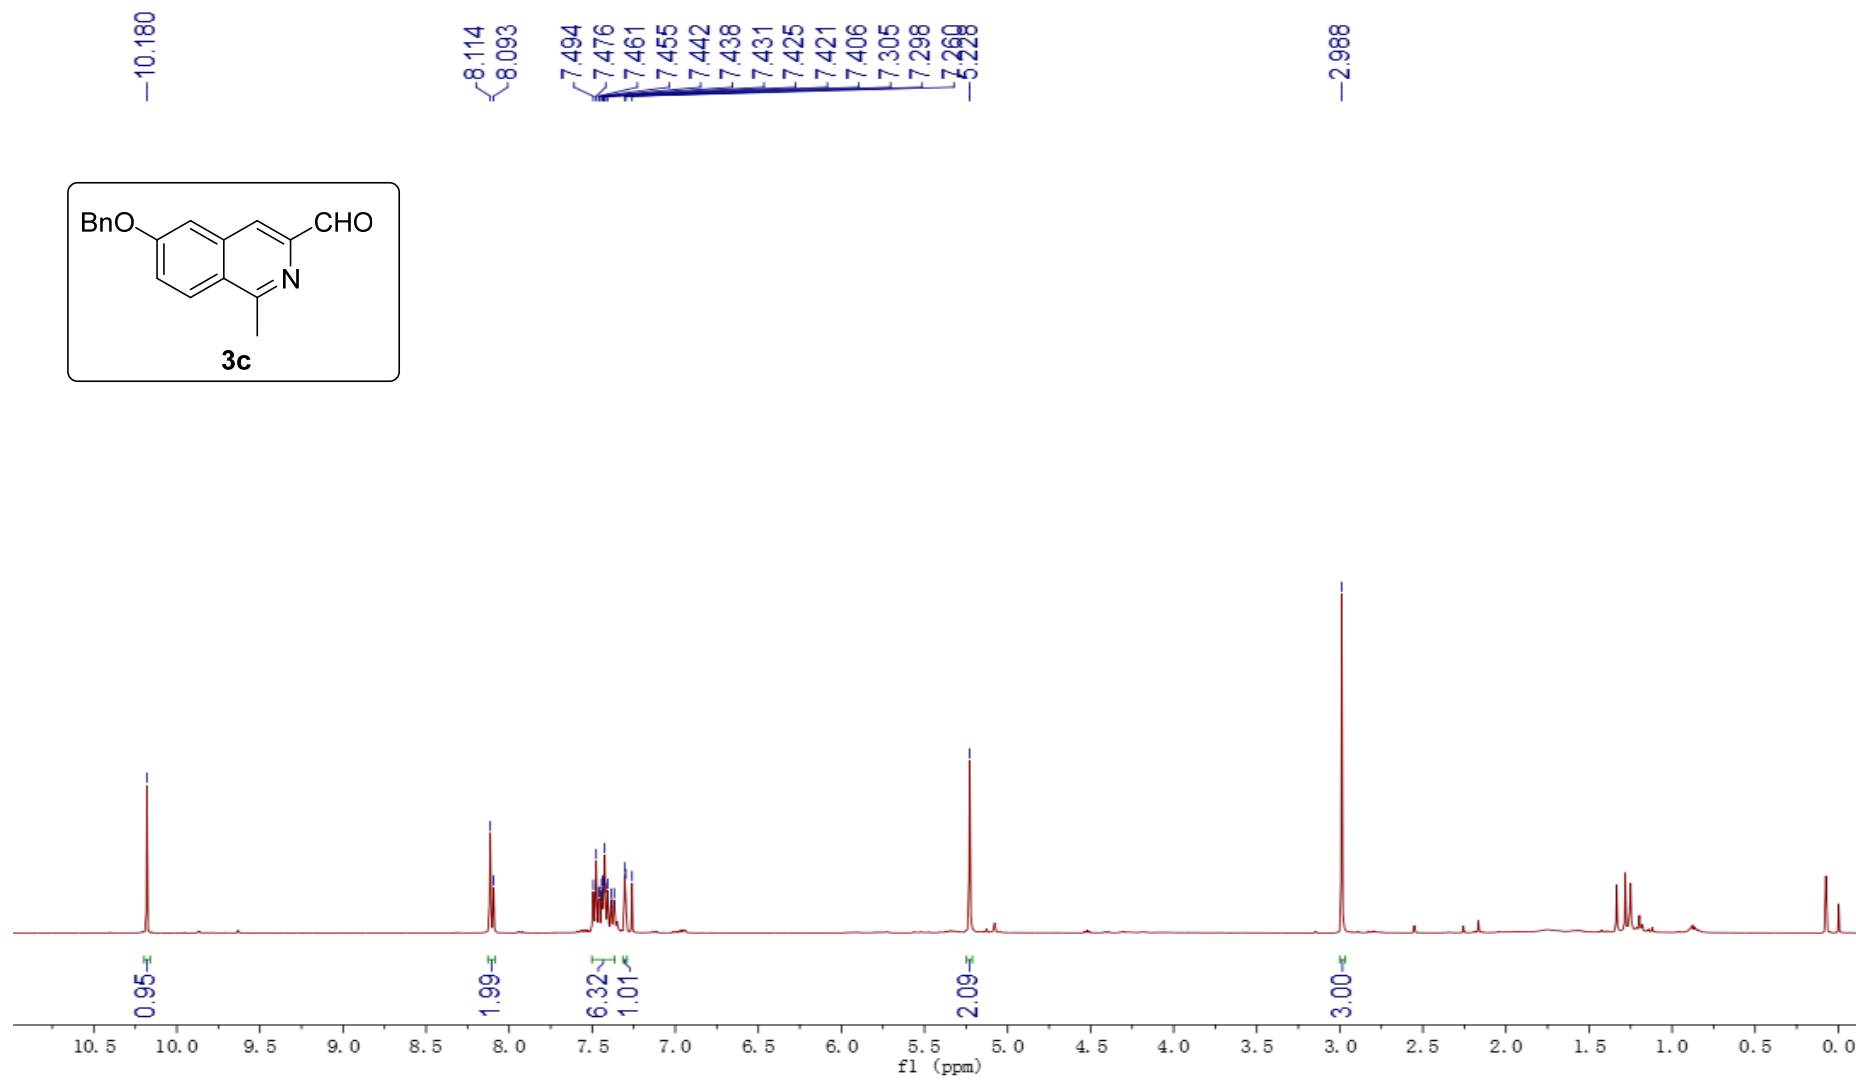

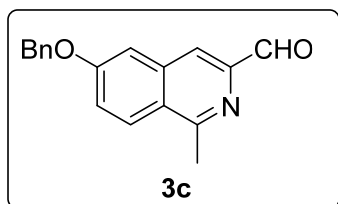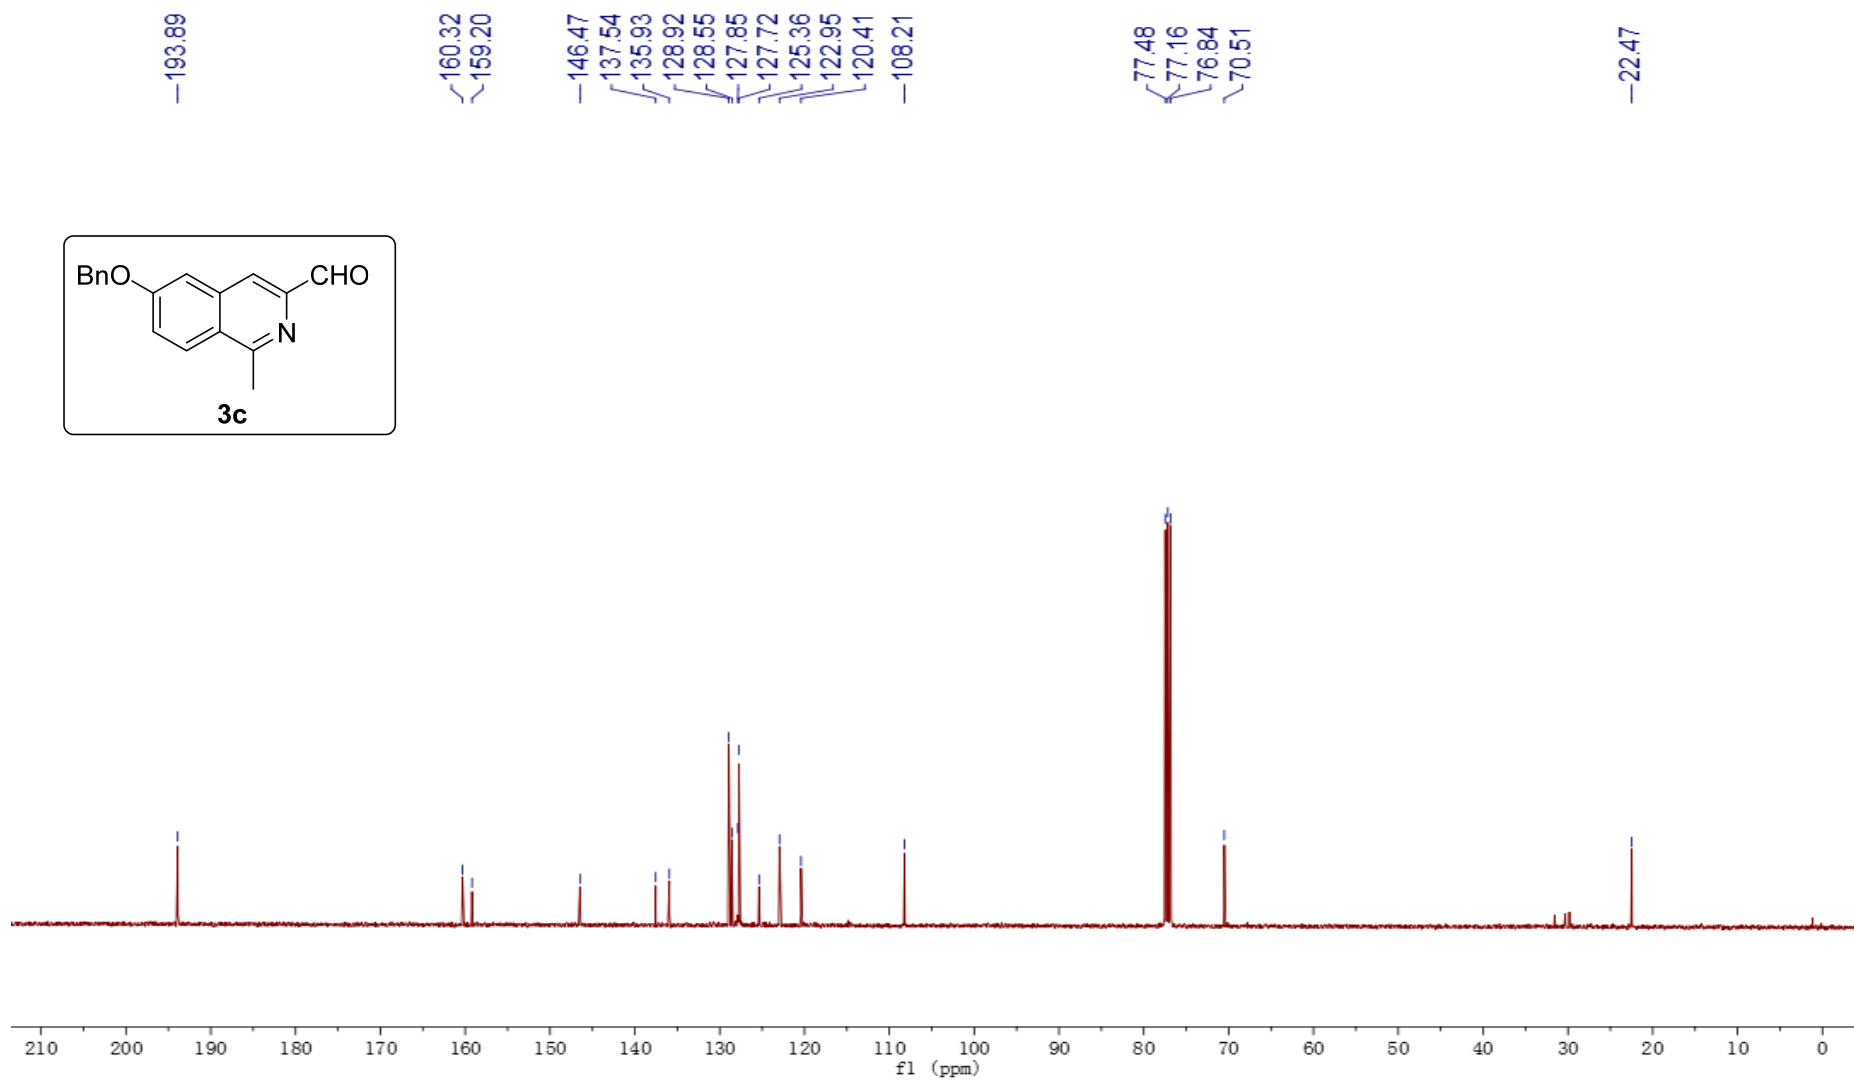

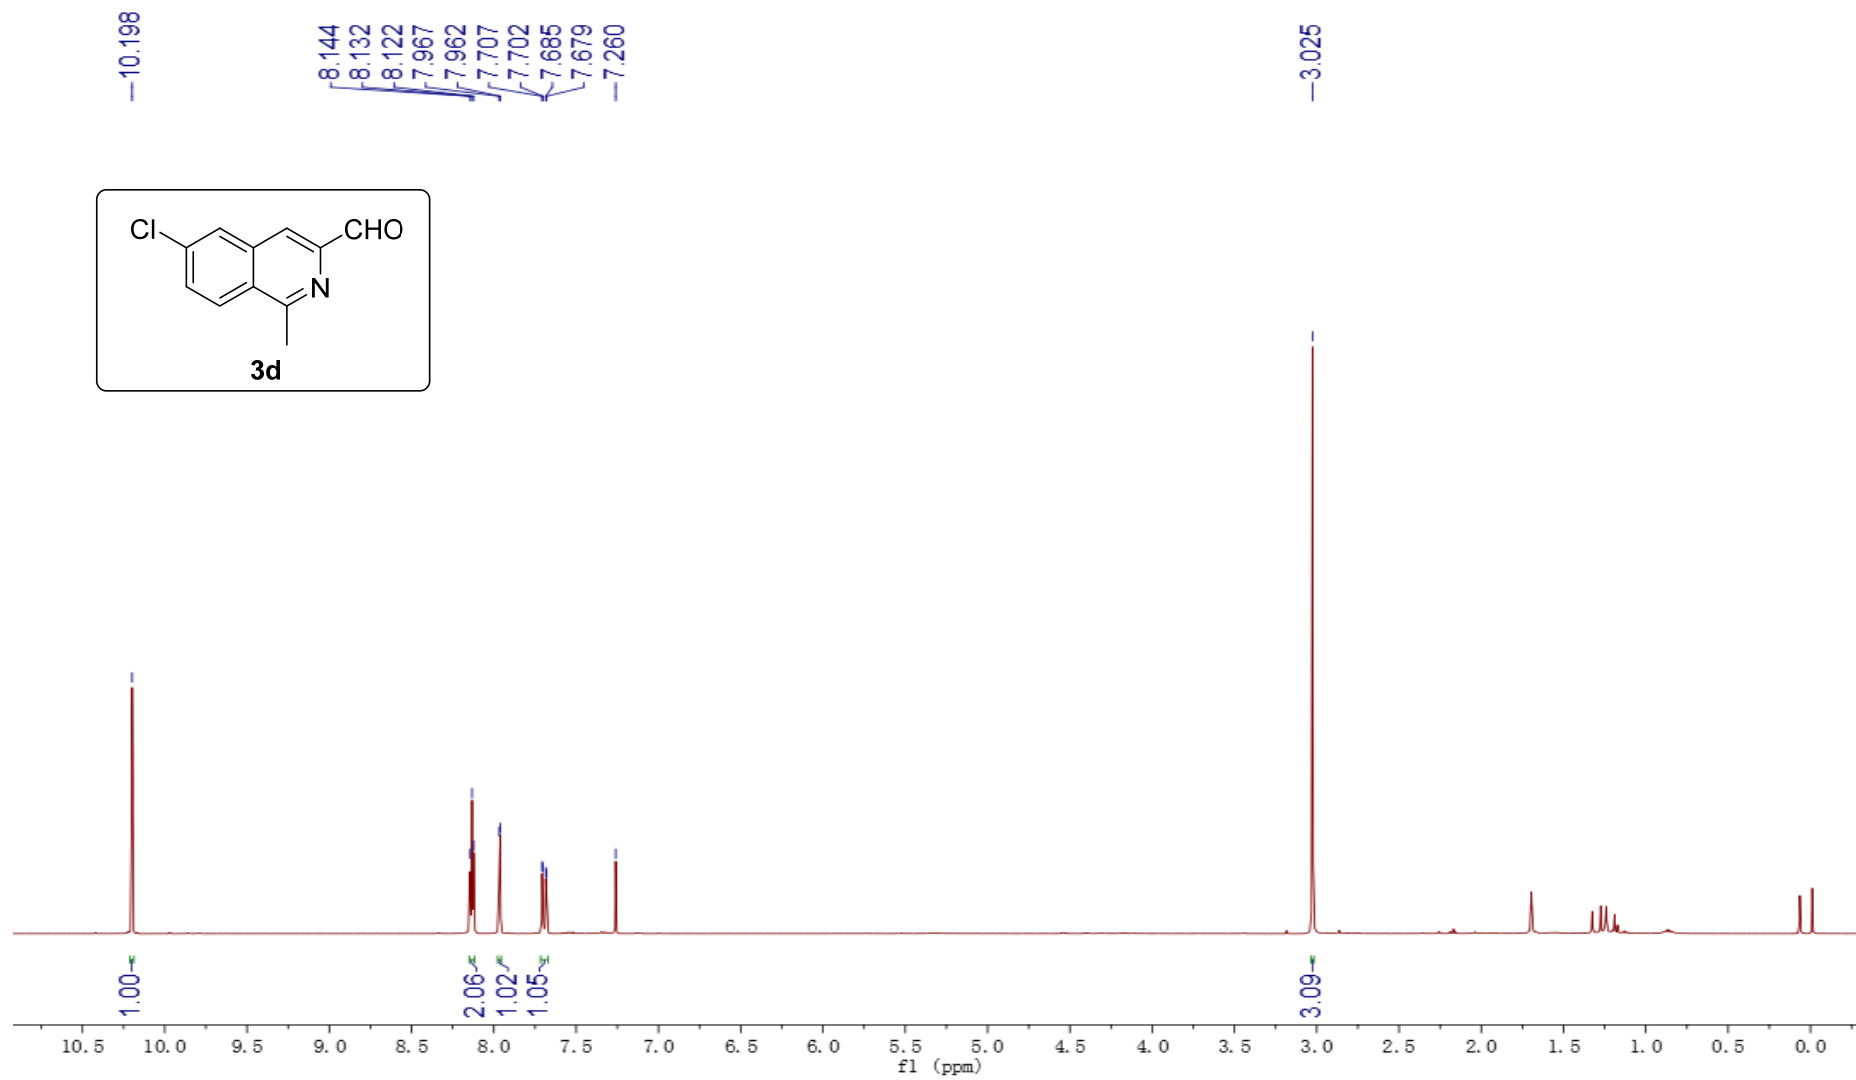

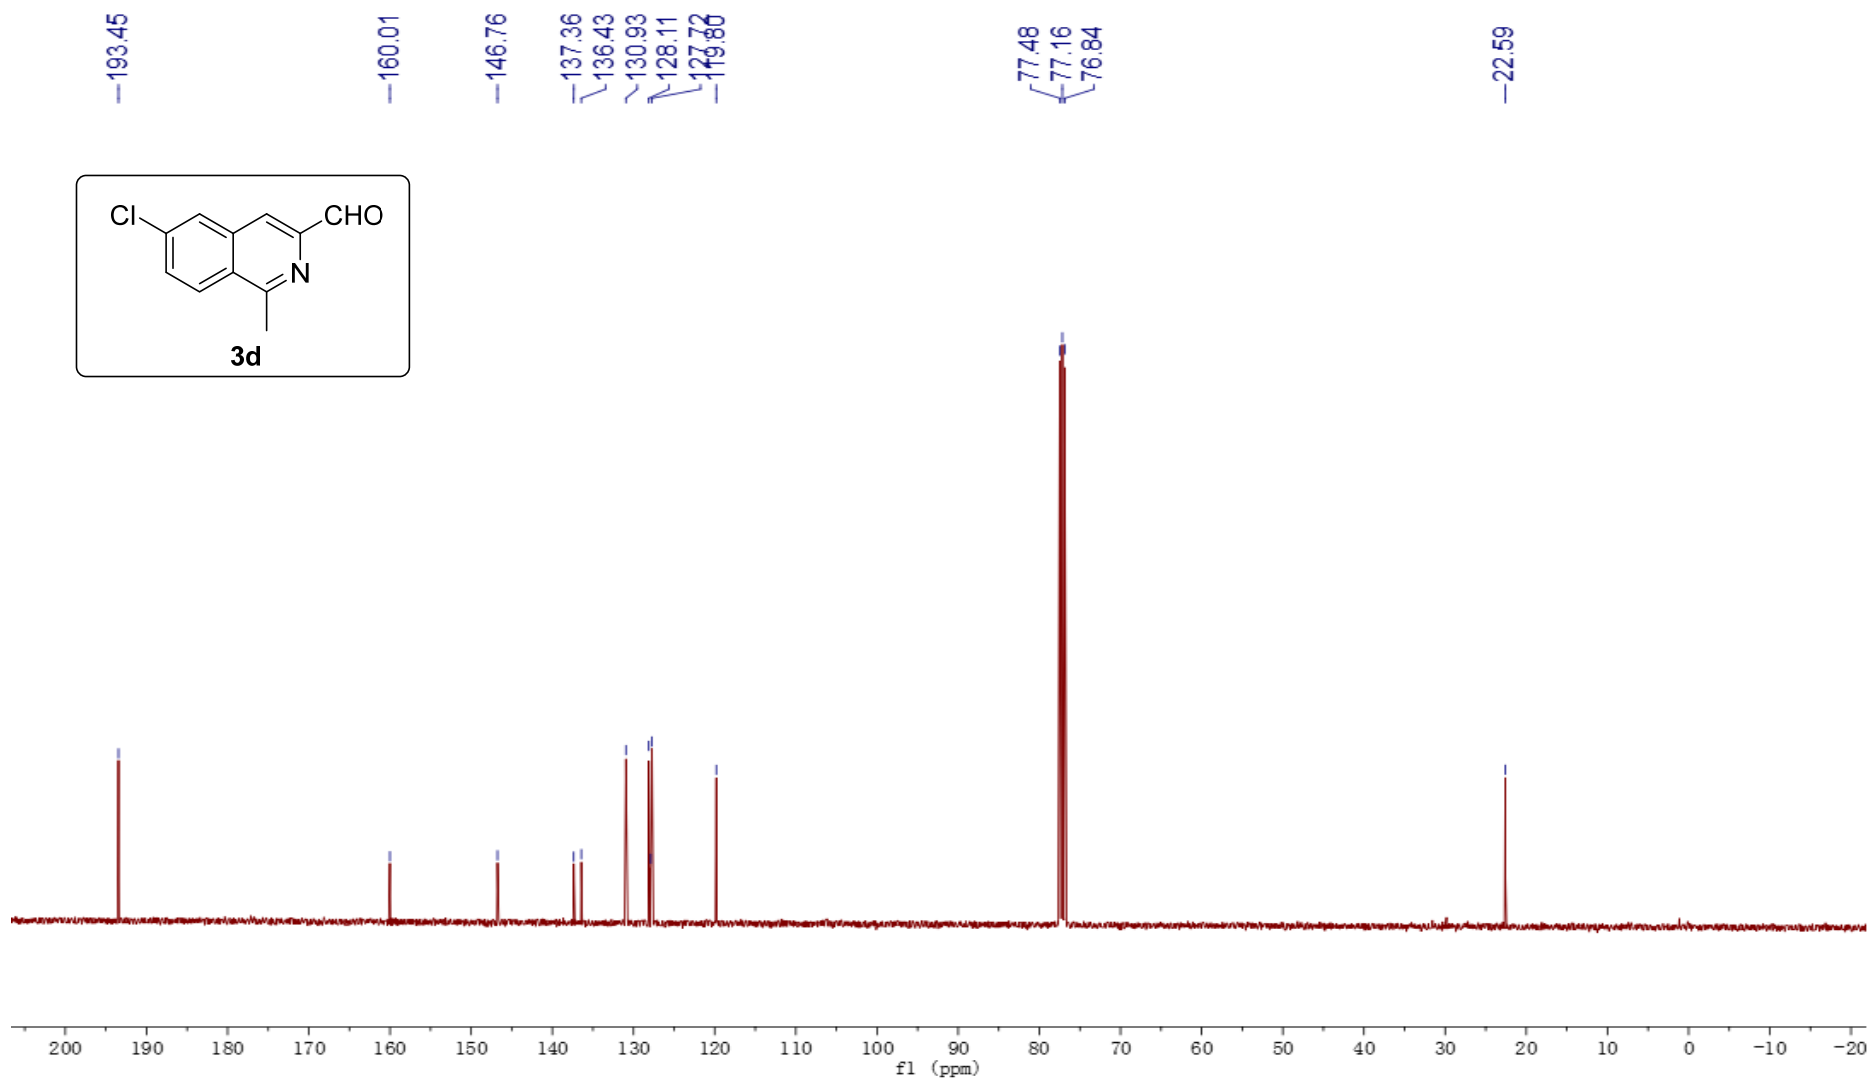

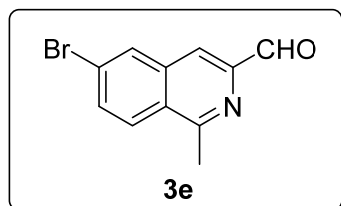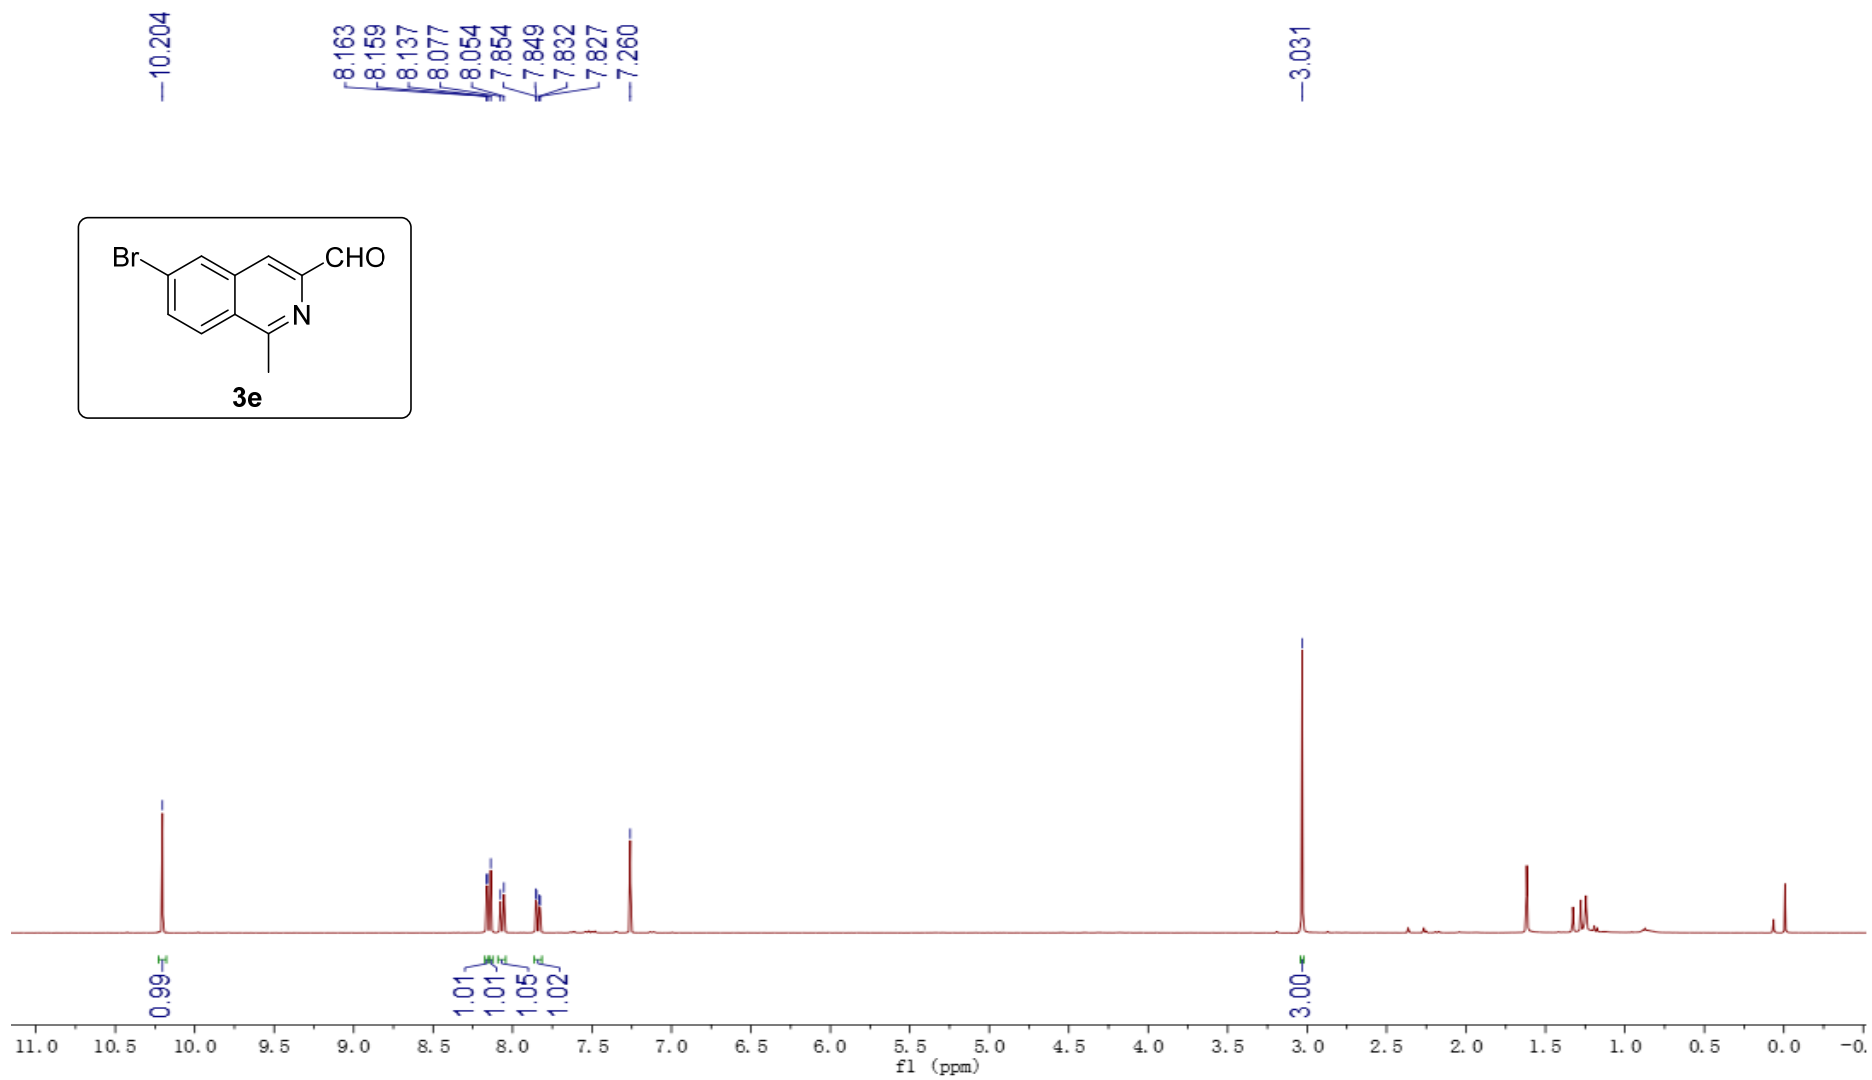

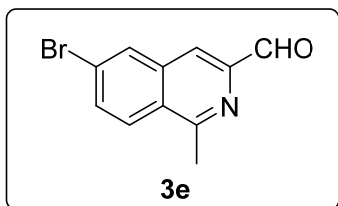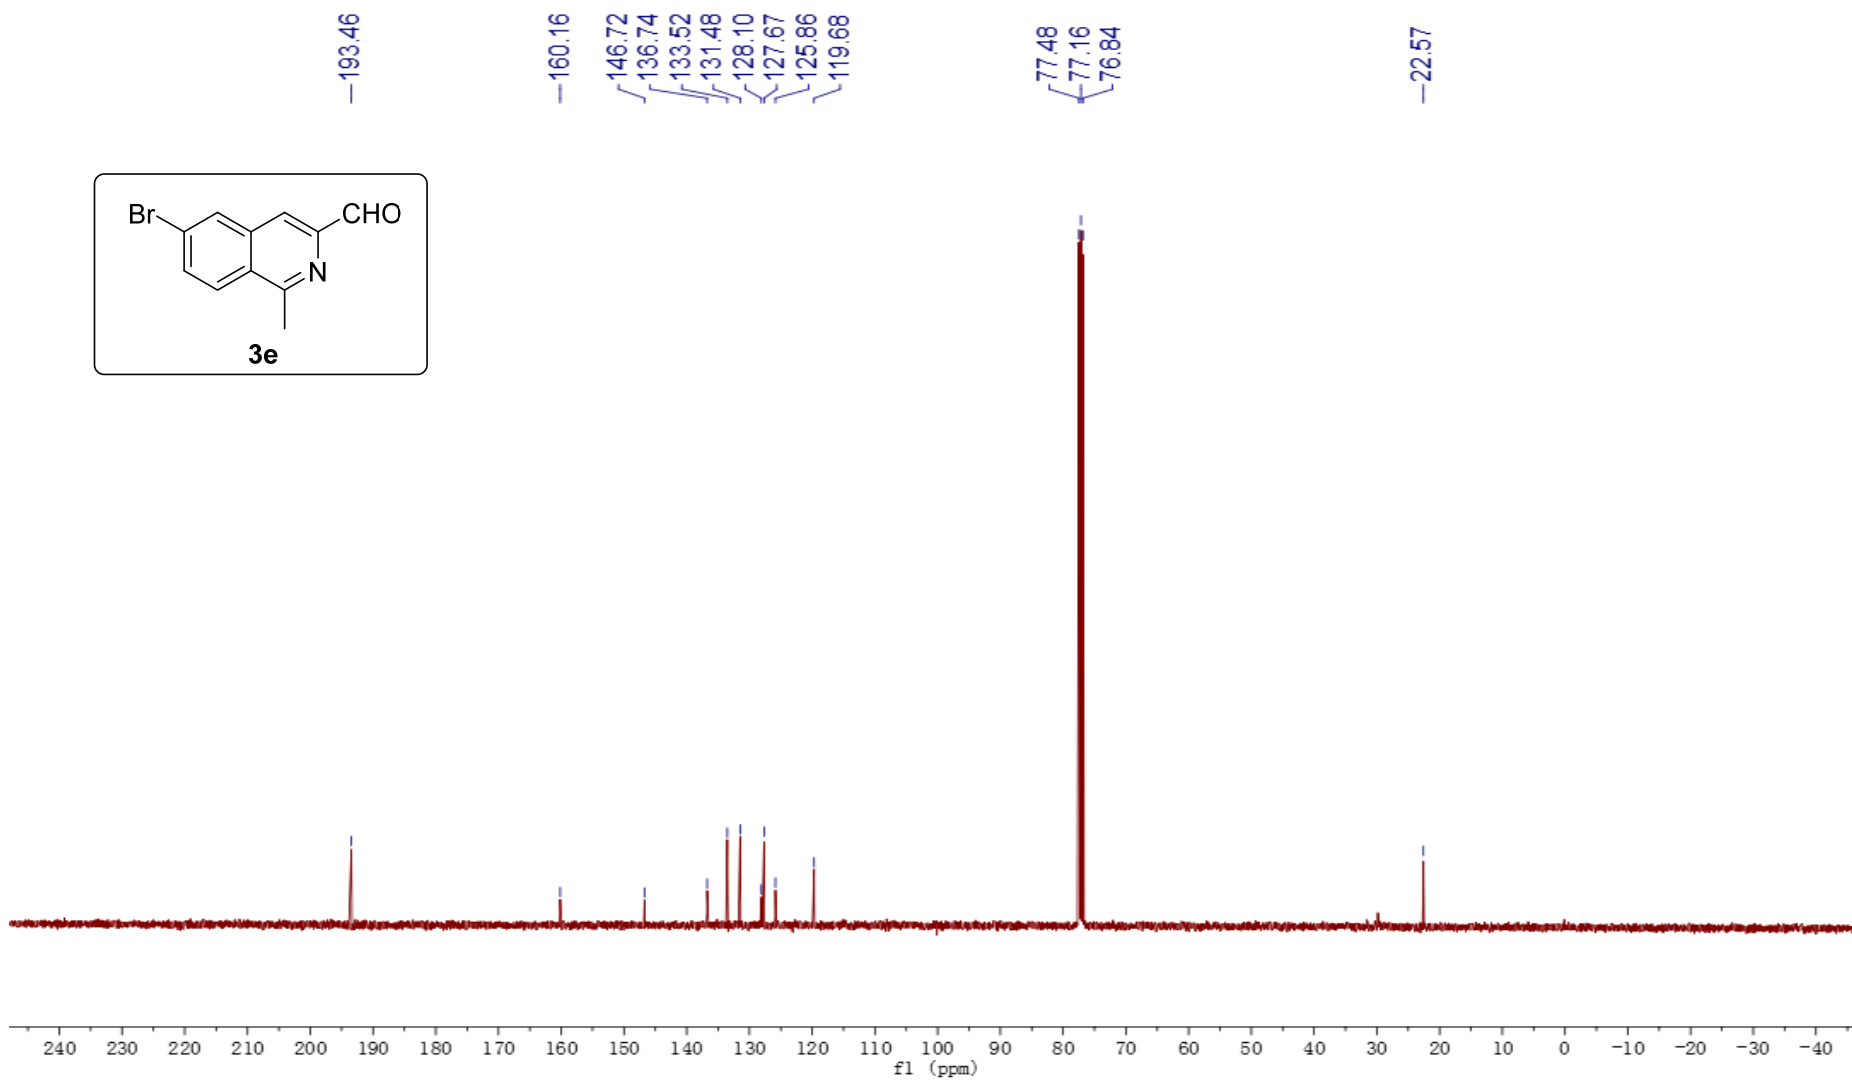

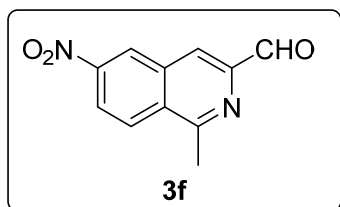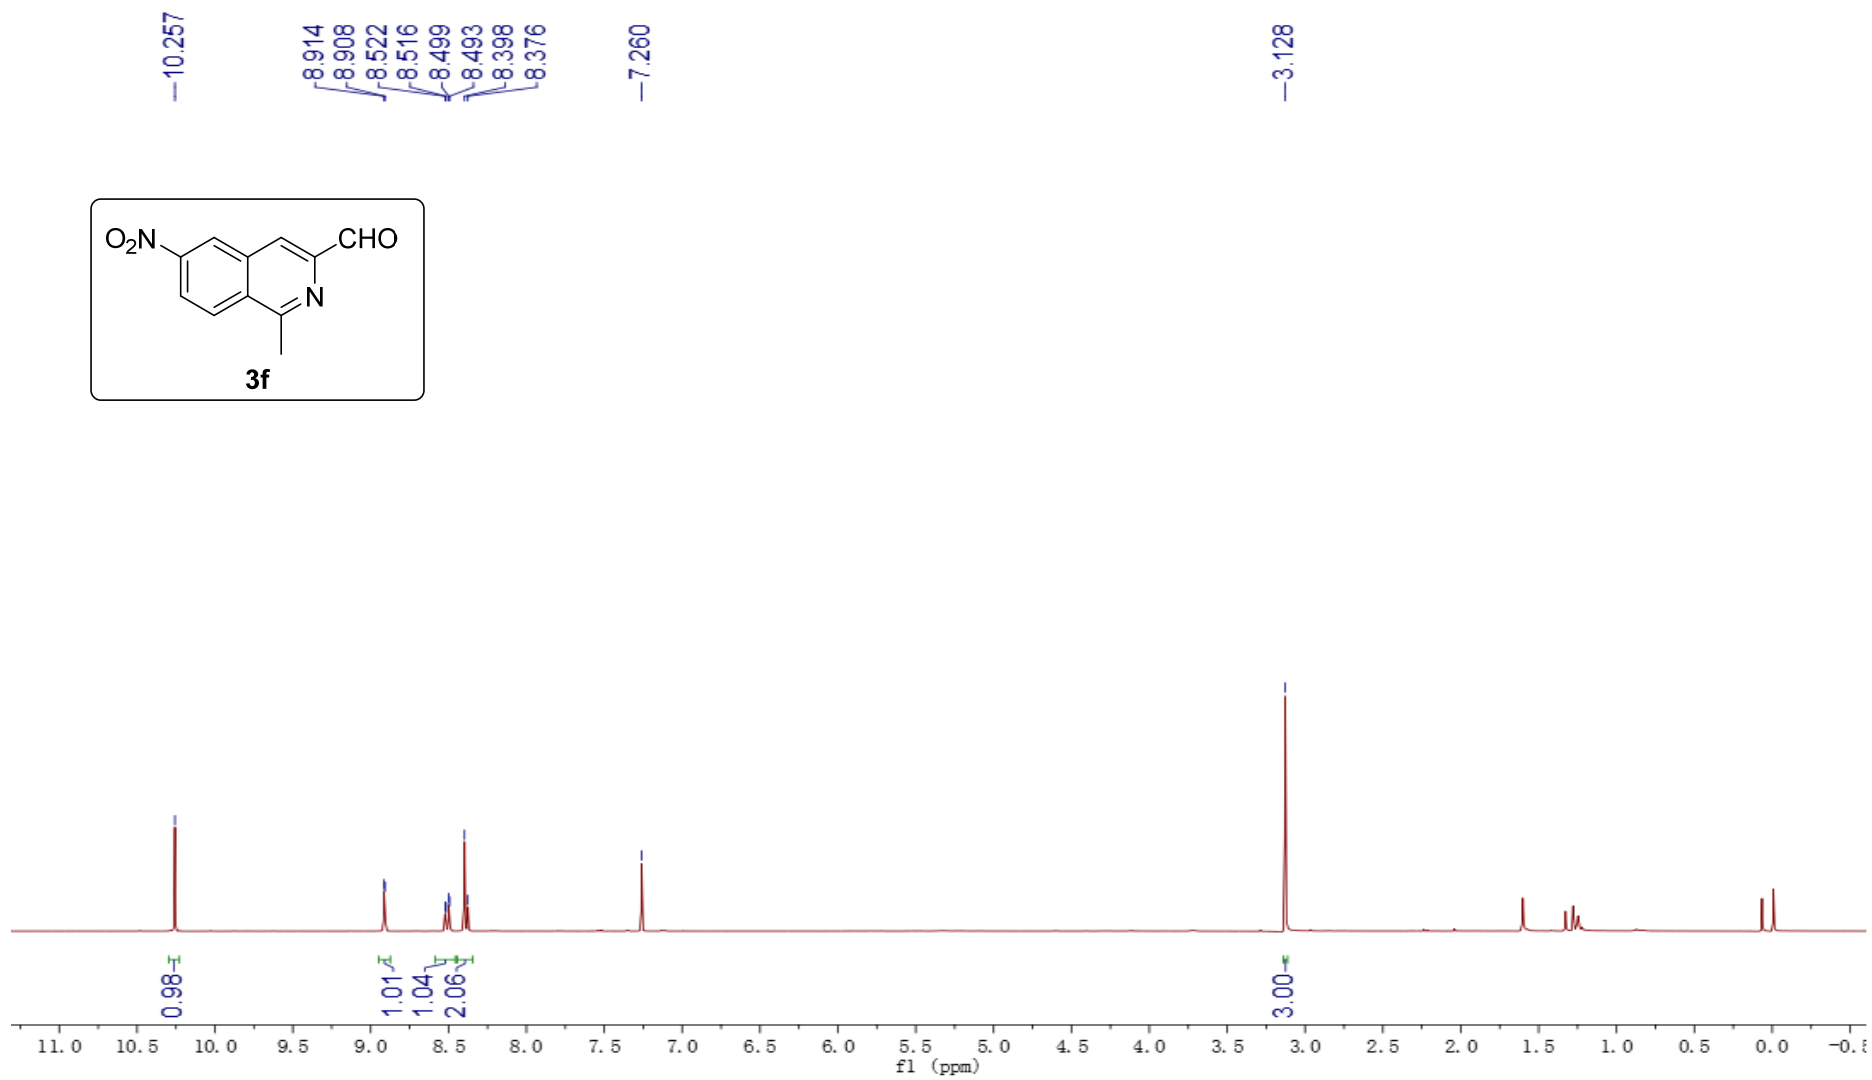



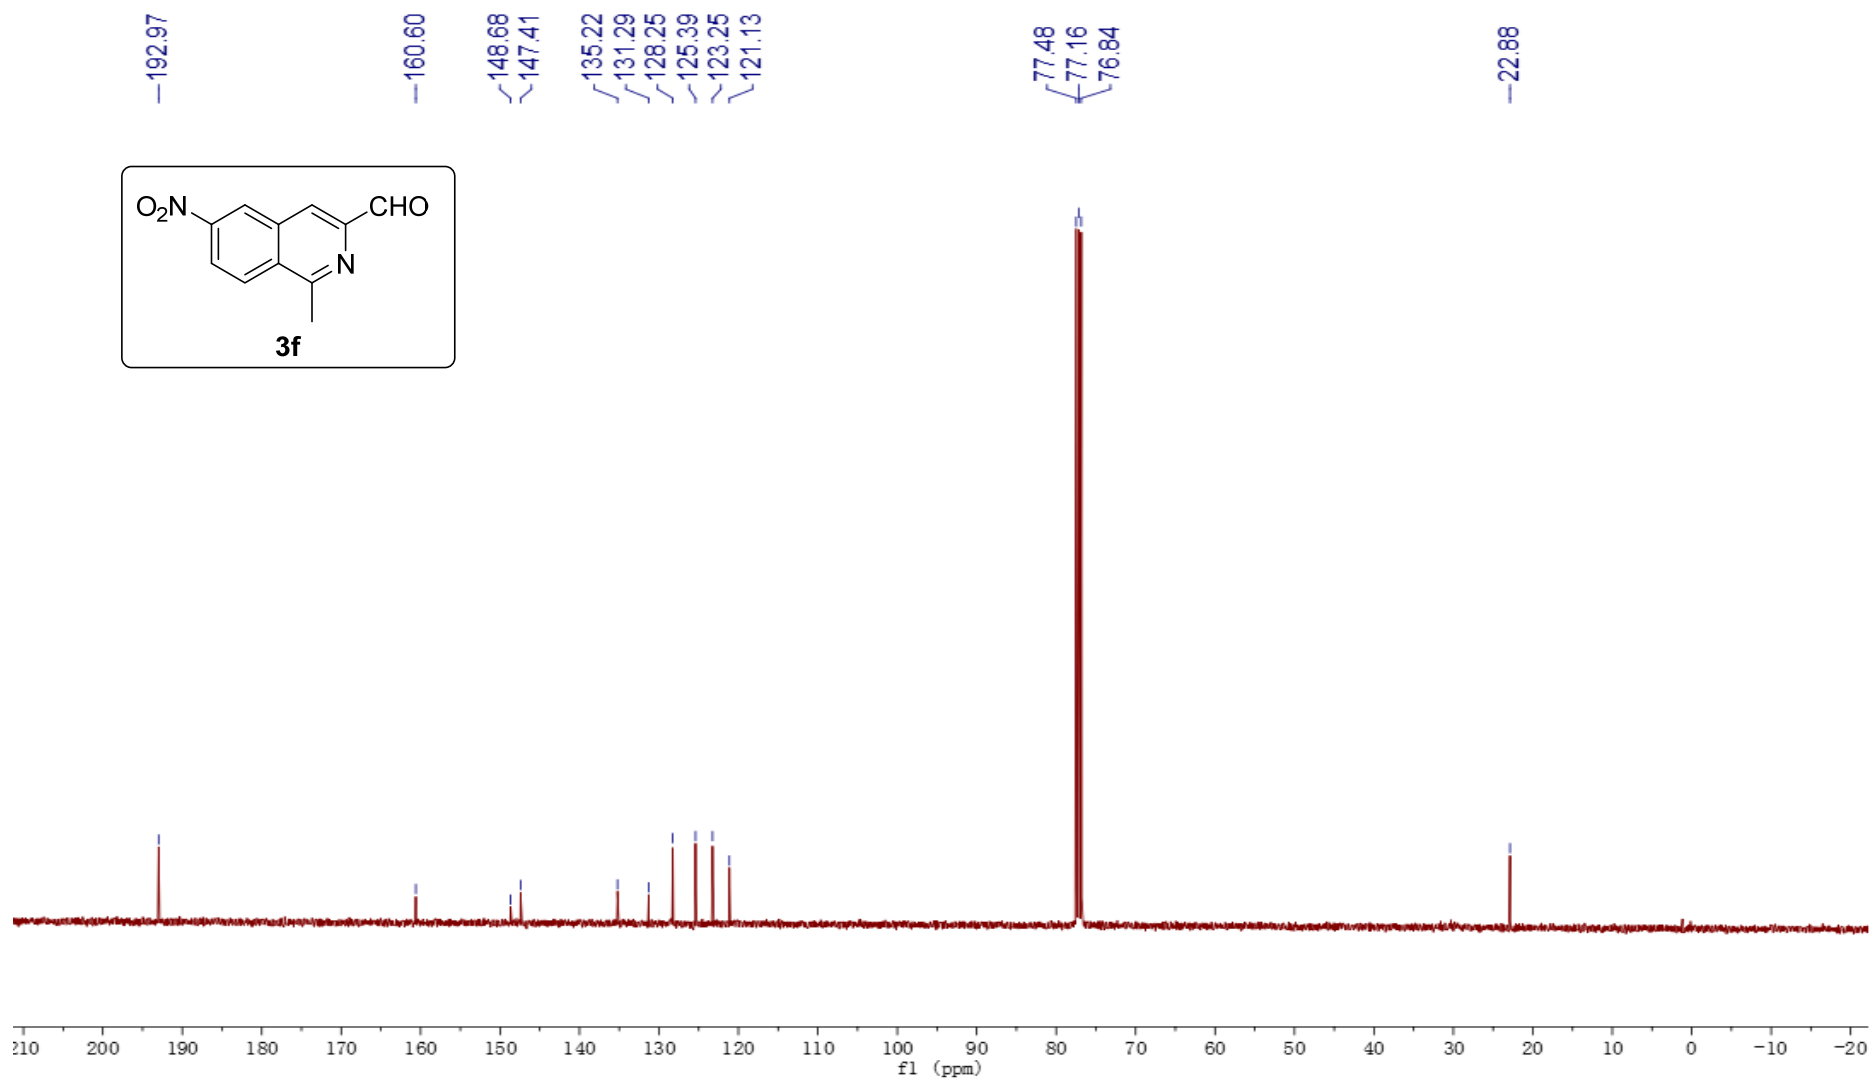

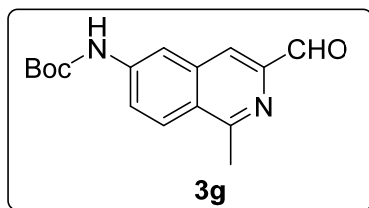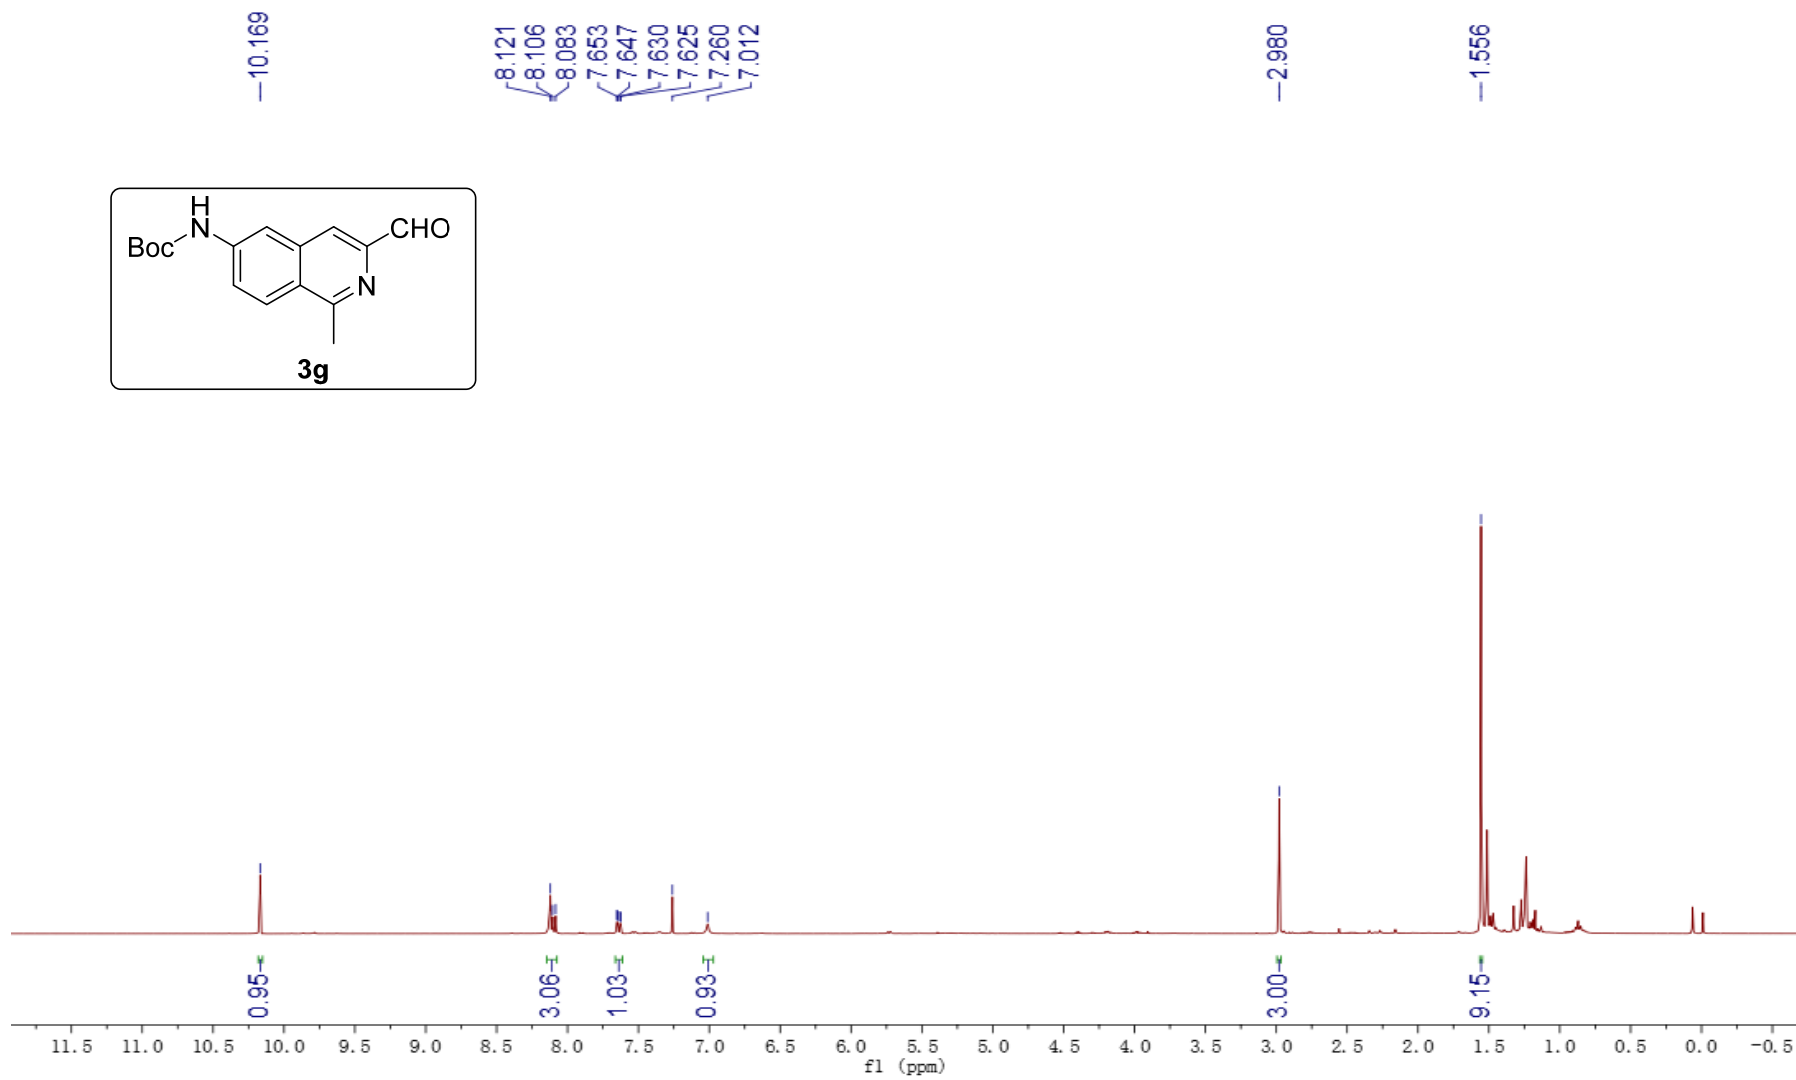

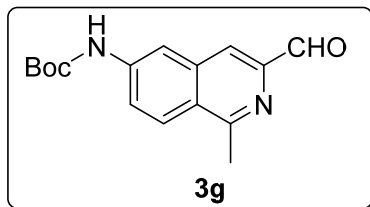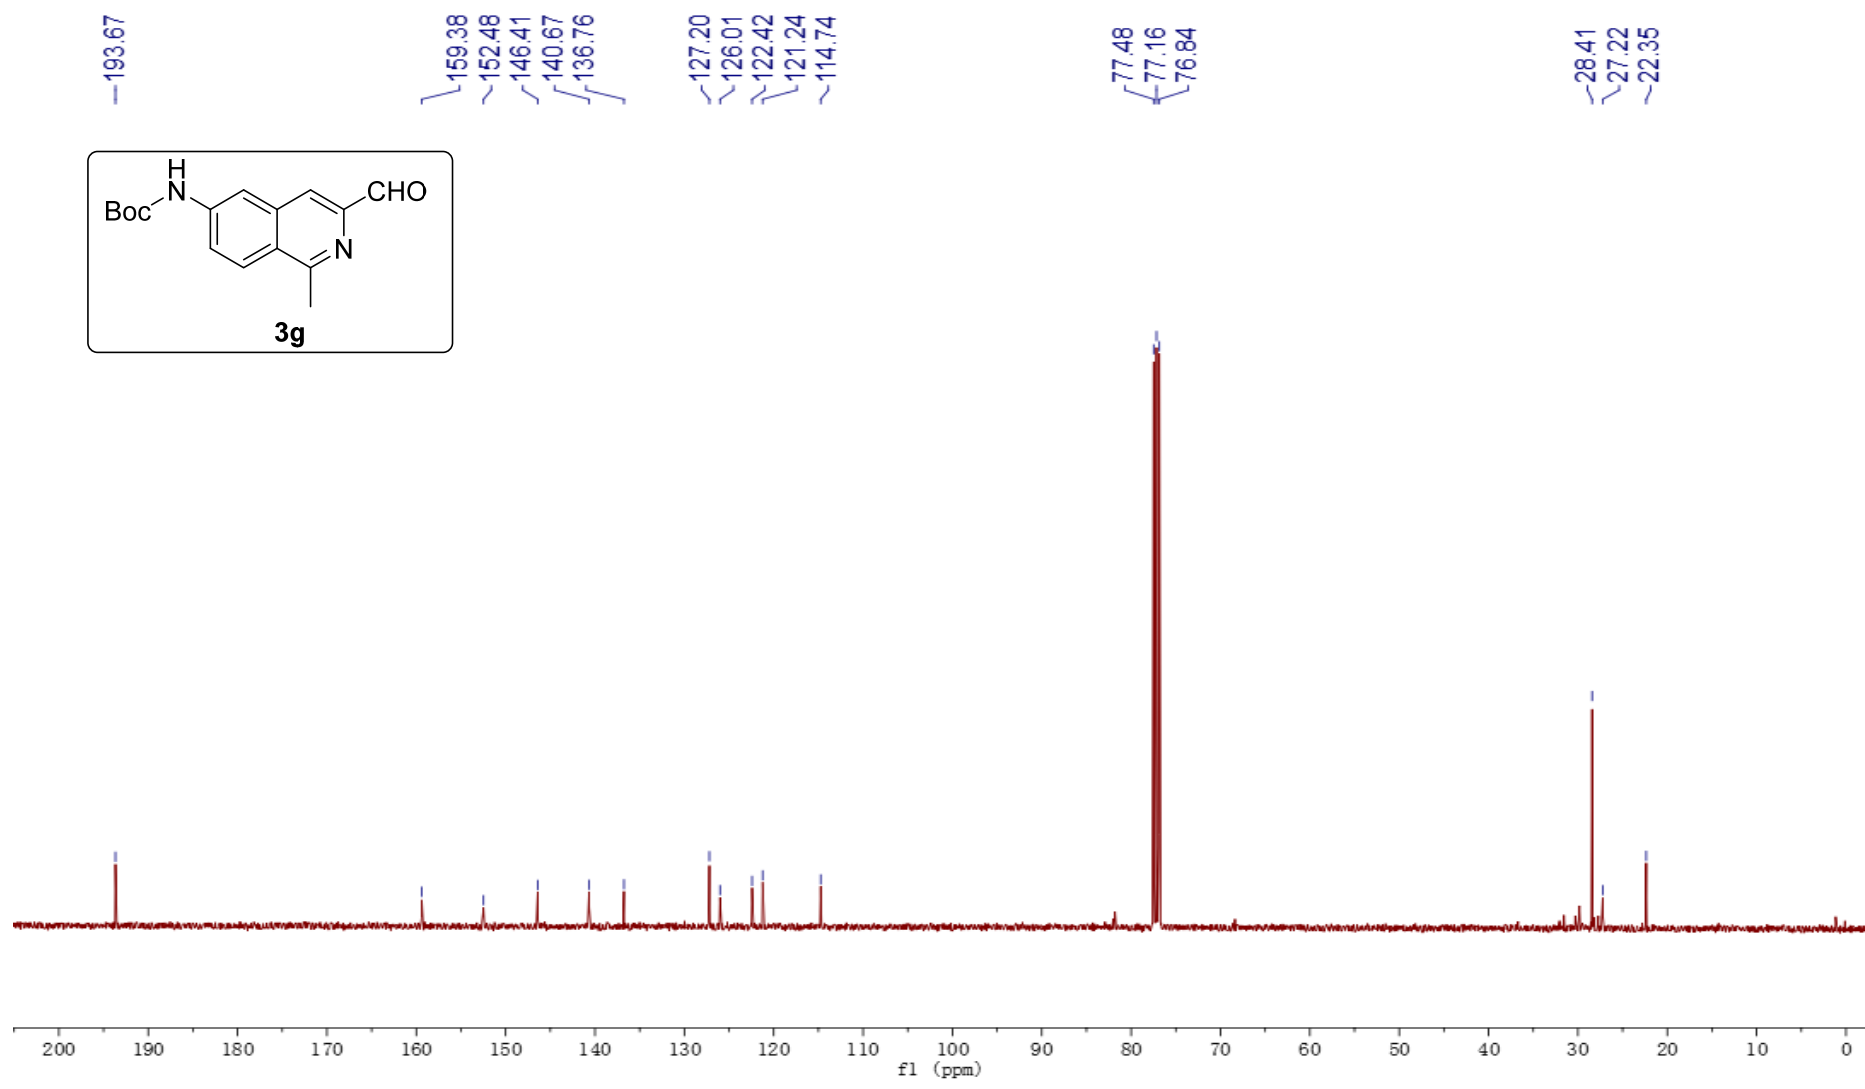

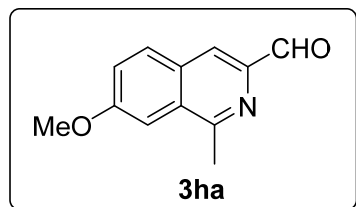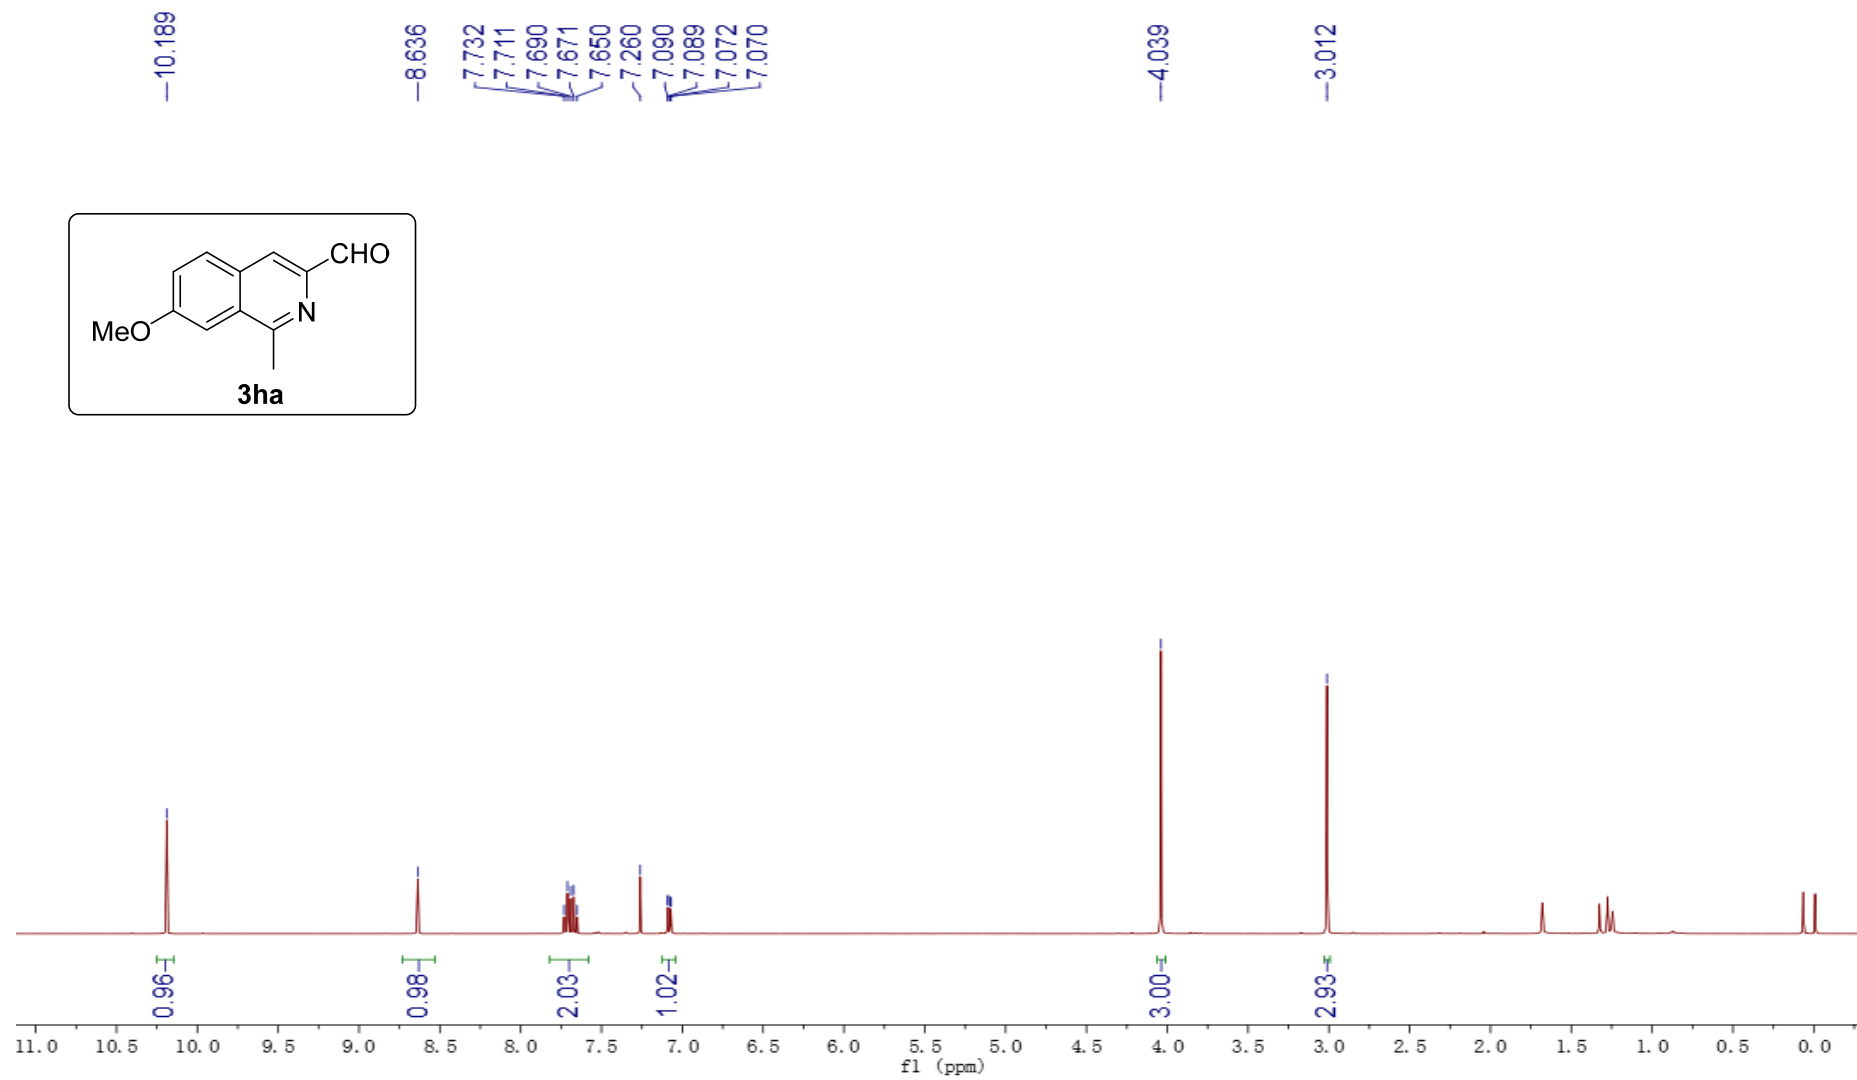

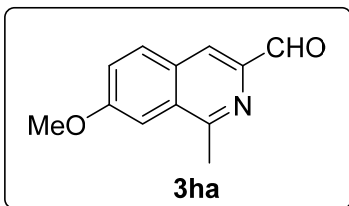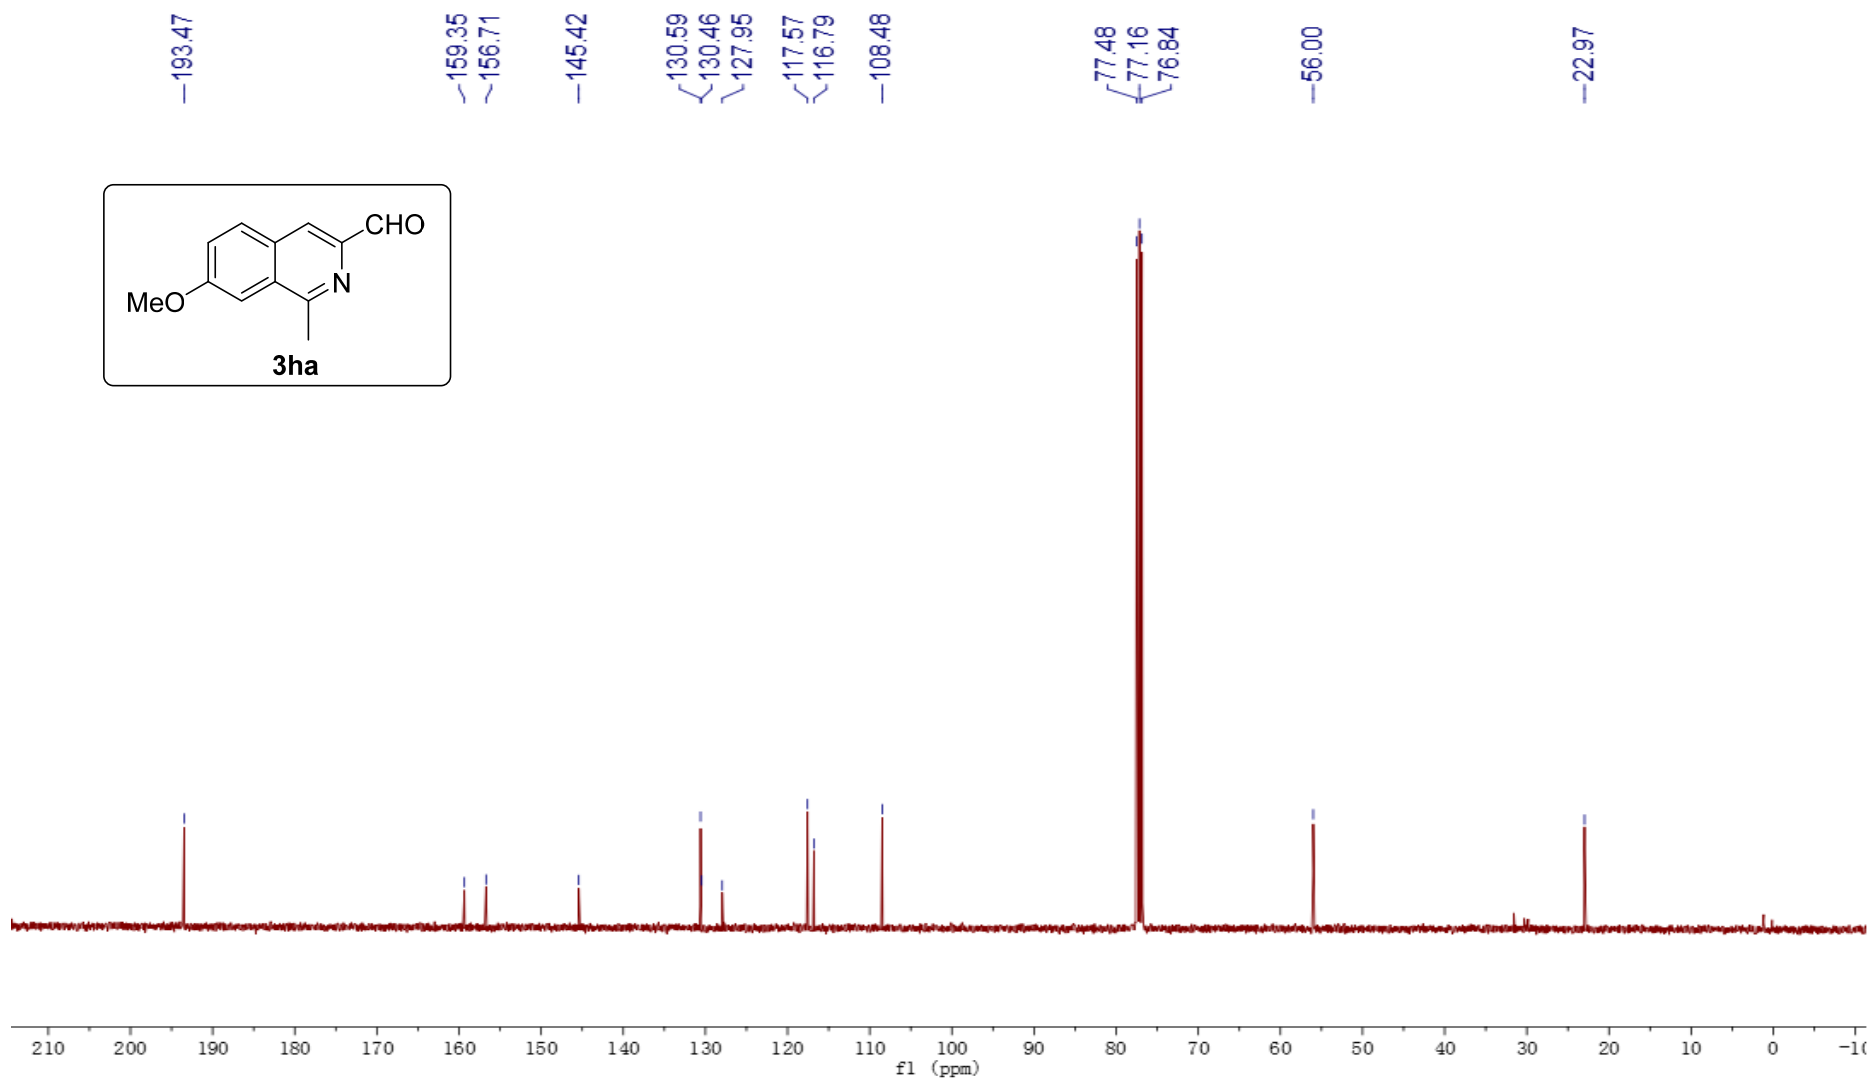

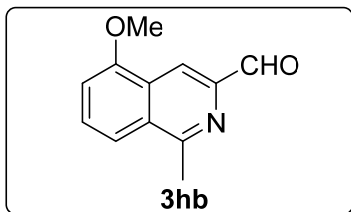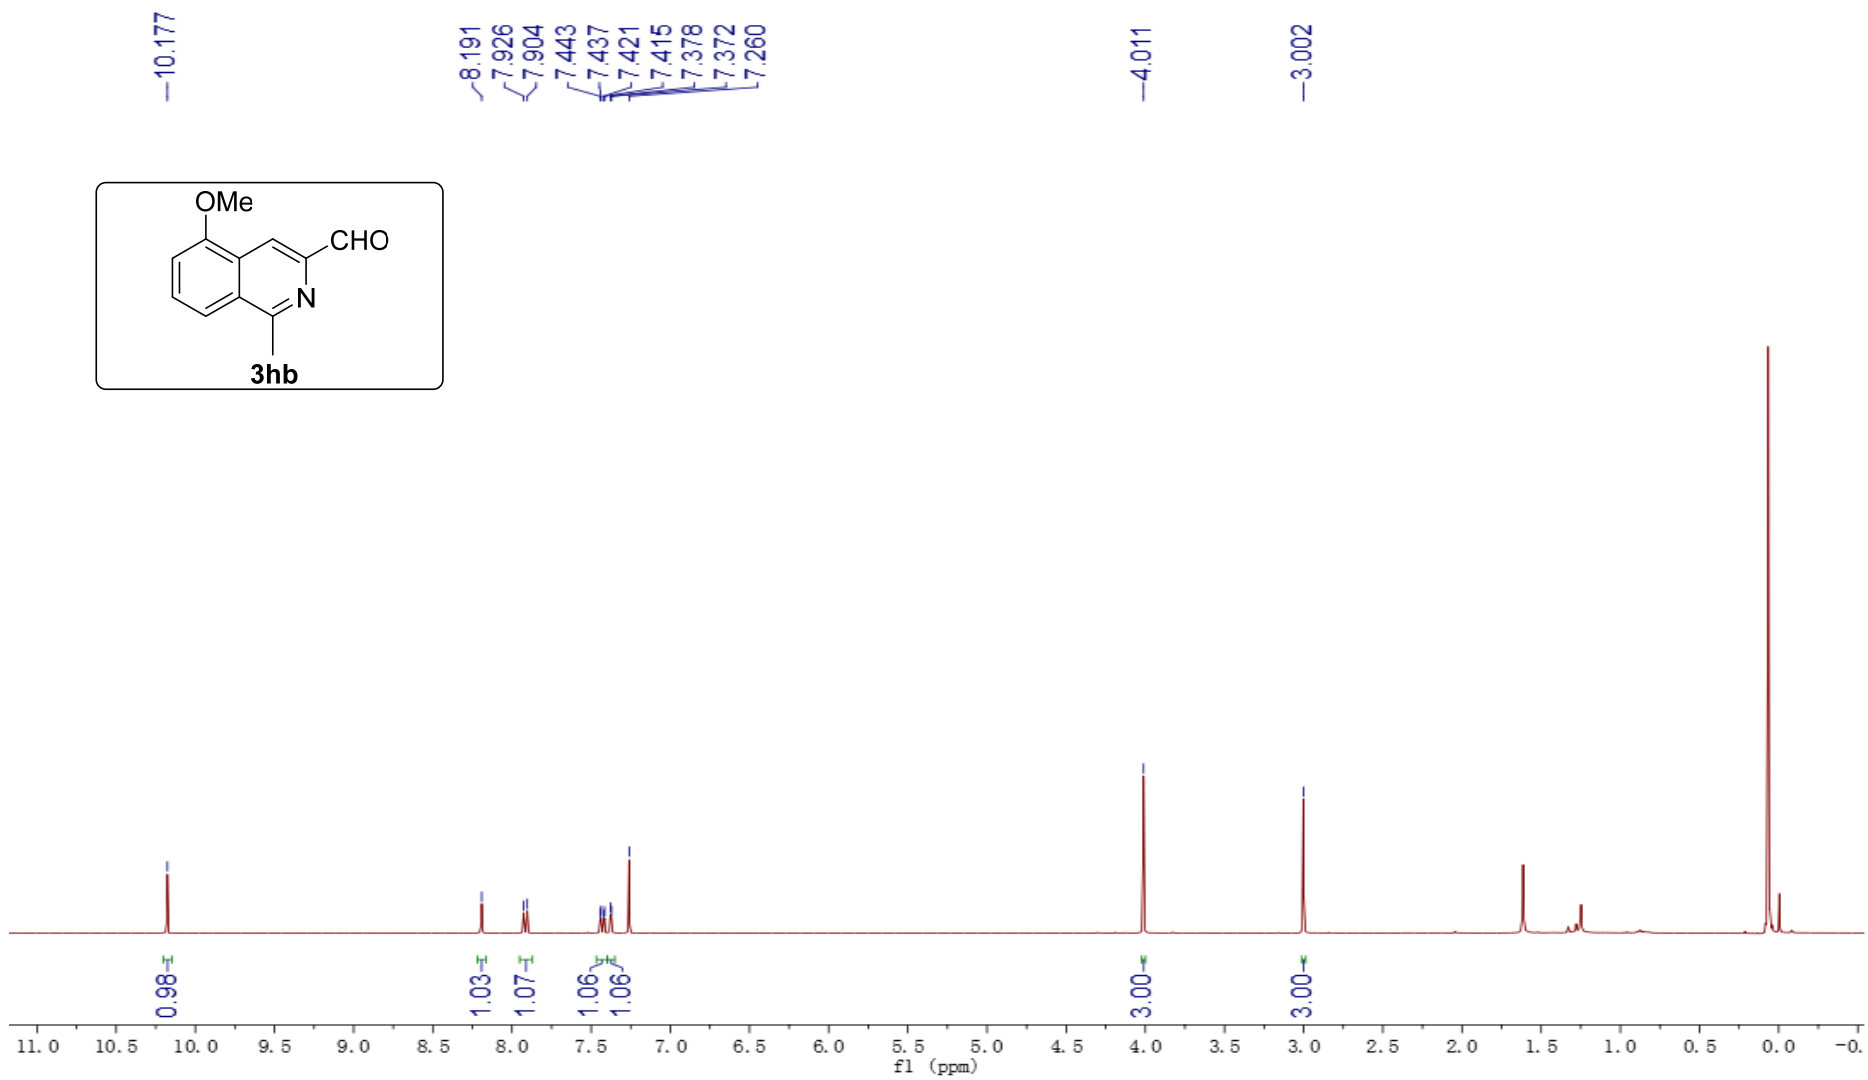

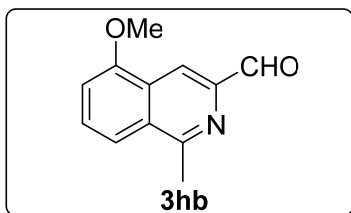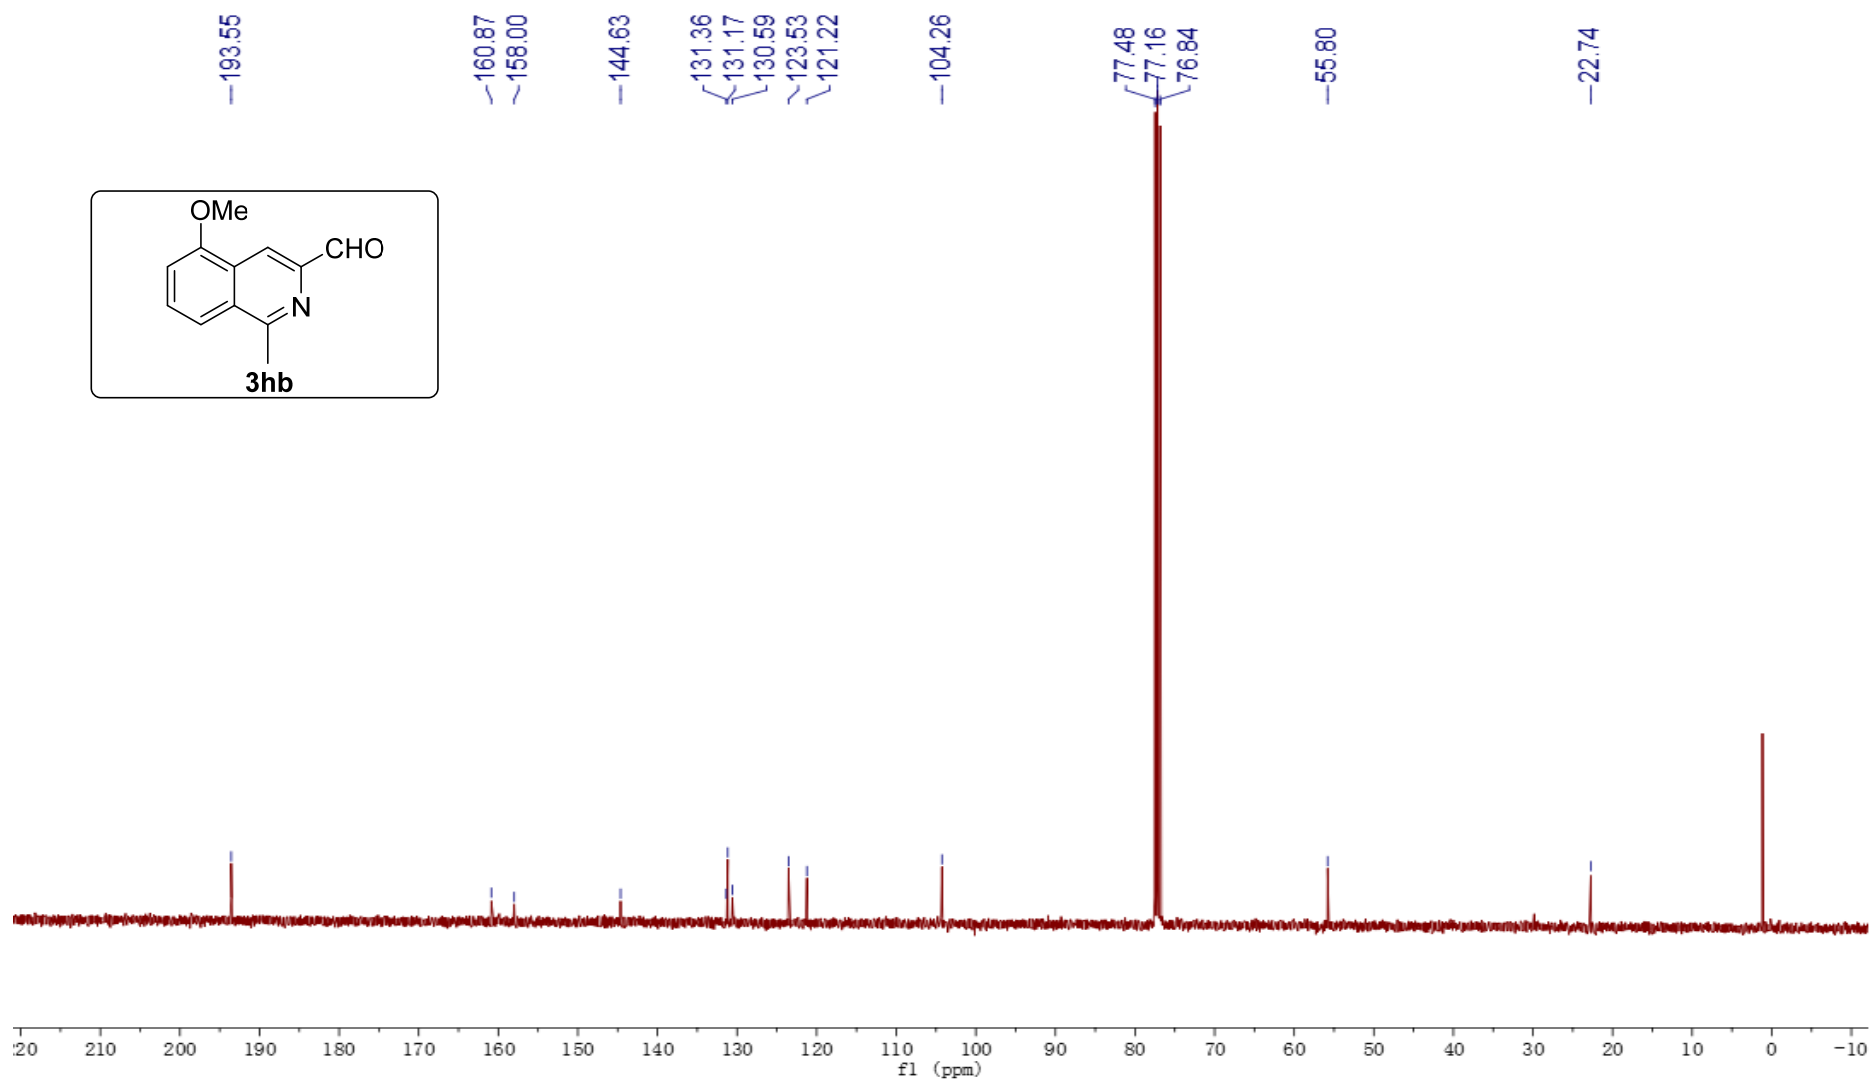

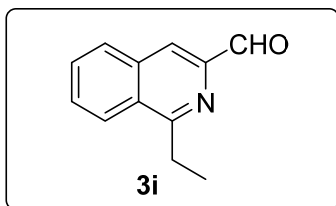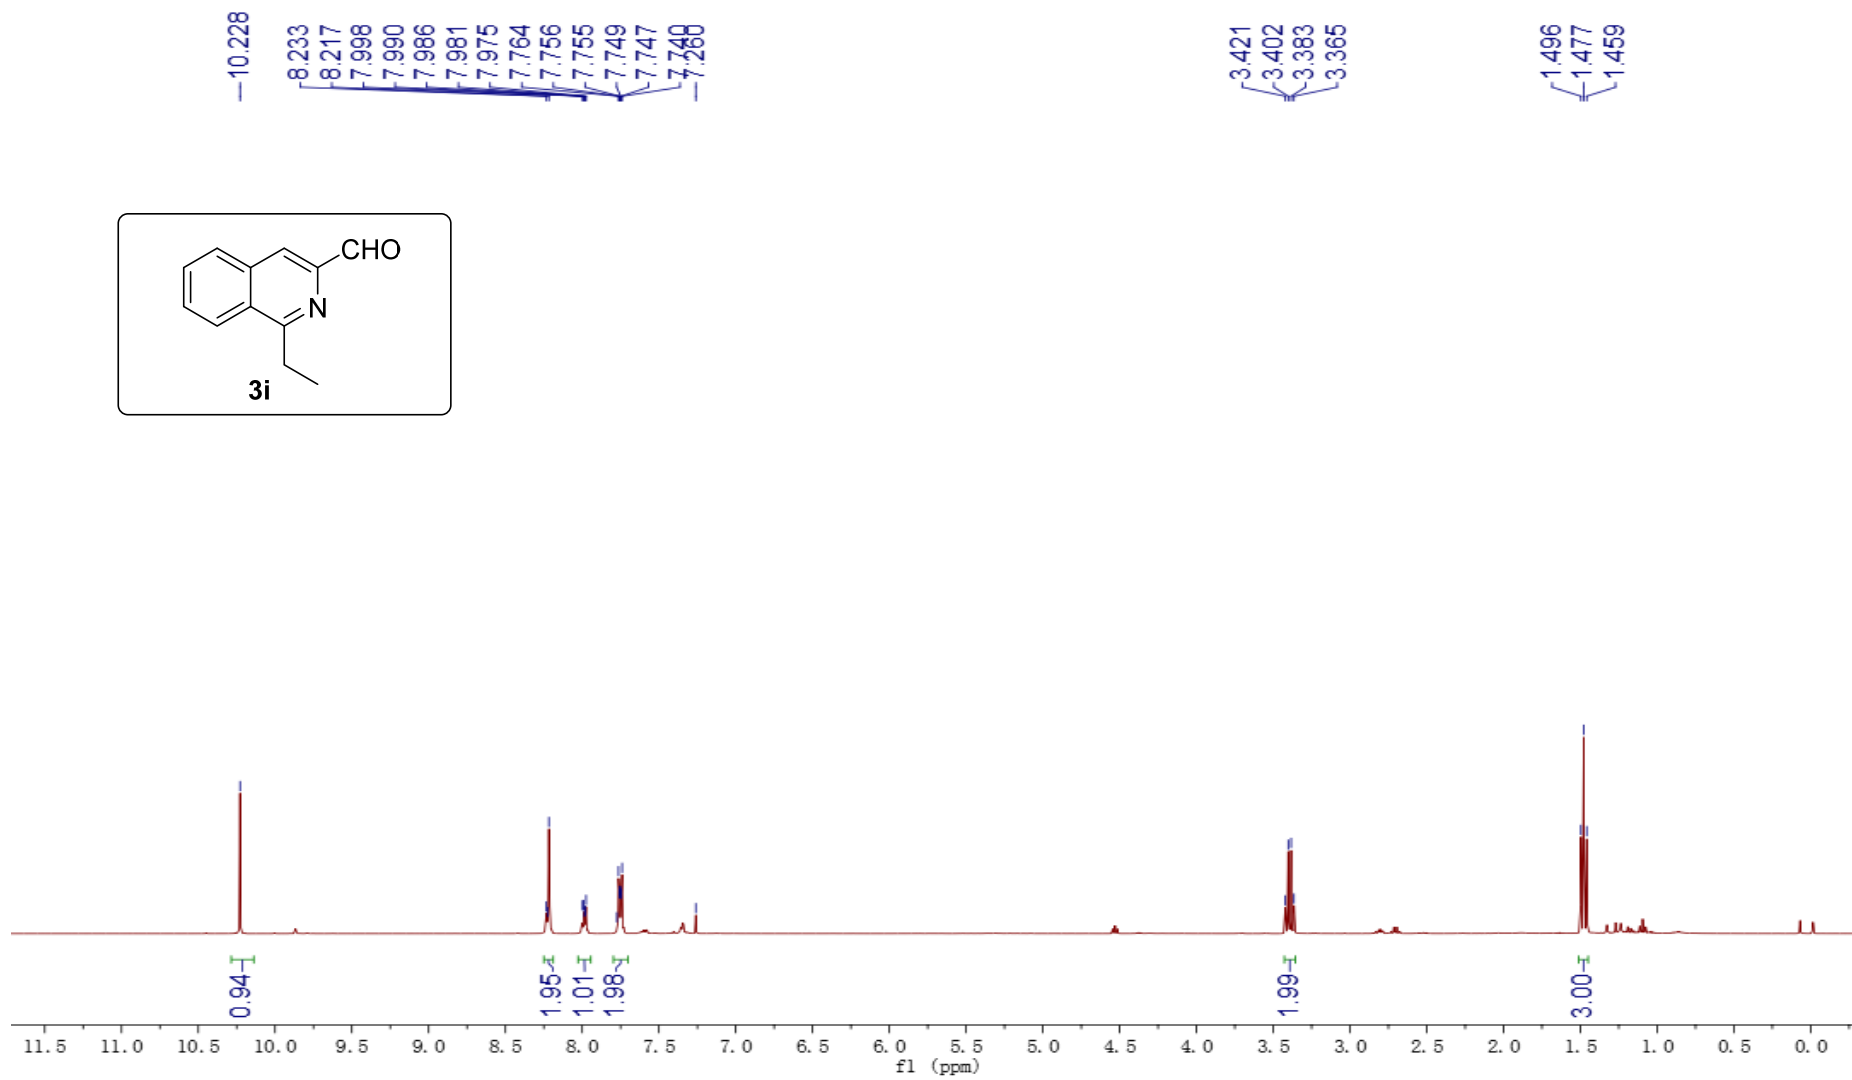



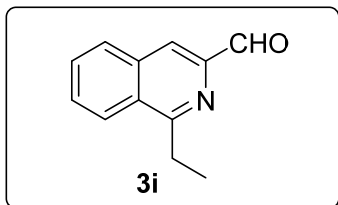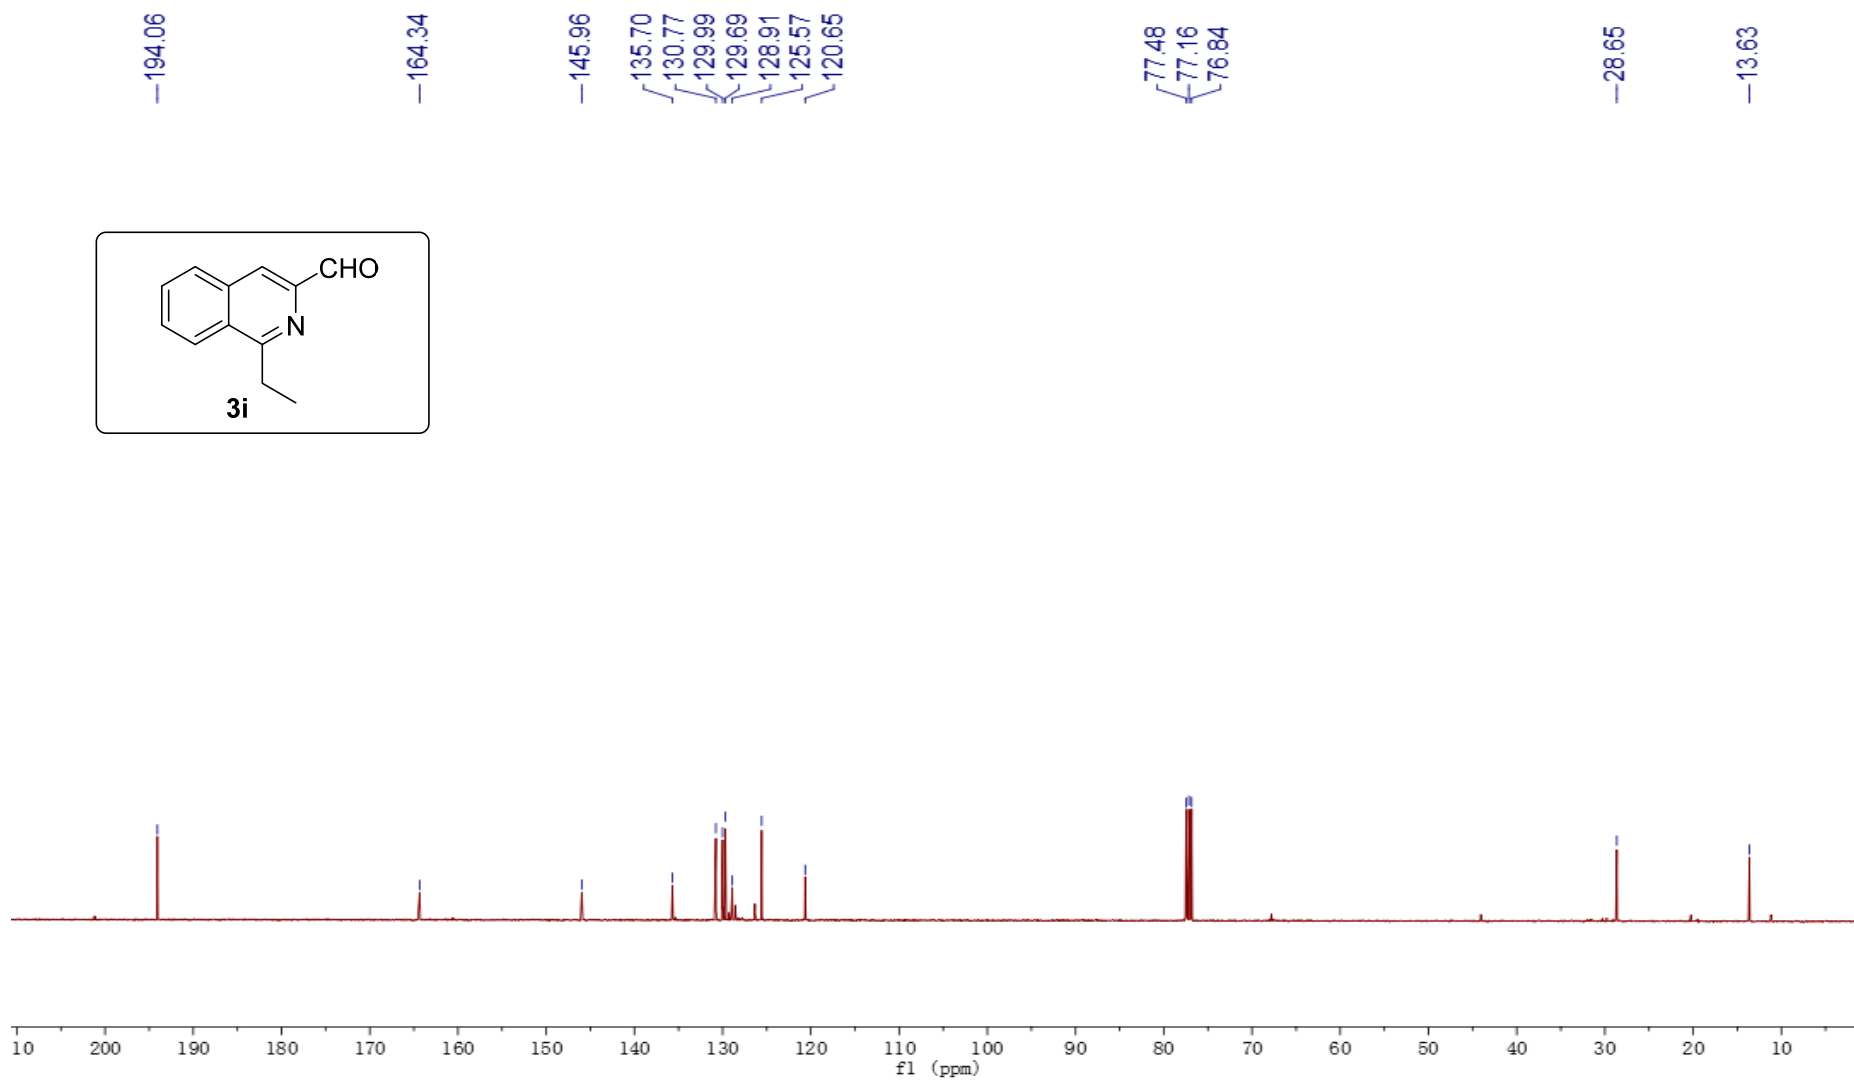

10.281  
8.302  
8.223  
8.202  
8.011  
7.991  
7.753  
7.751  
7.734  
7.717  
7.714  
7.702  
7.699  
7.682  
7.664  
7.662  
7.325  
7.319  
7.301  
7.284  
7.279  
7.259  
7.241  
7.230  
7.200  
7.183  
7.170  
4.768

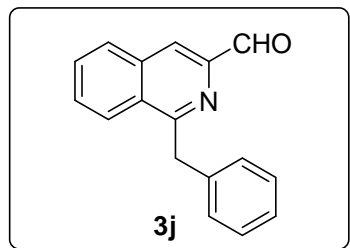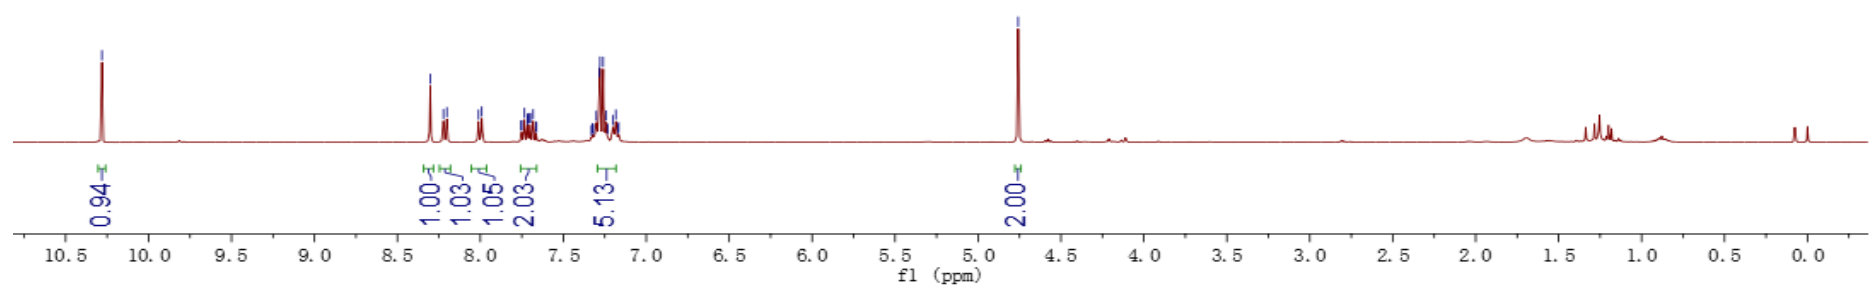

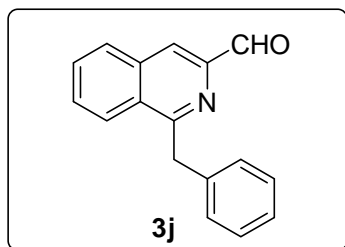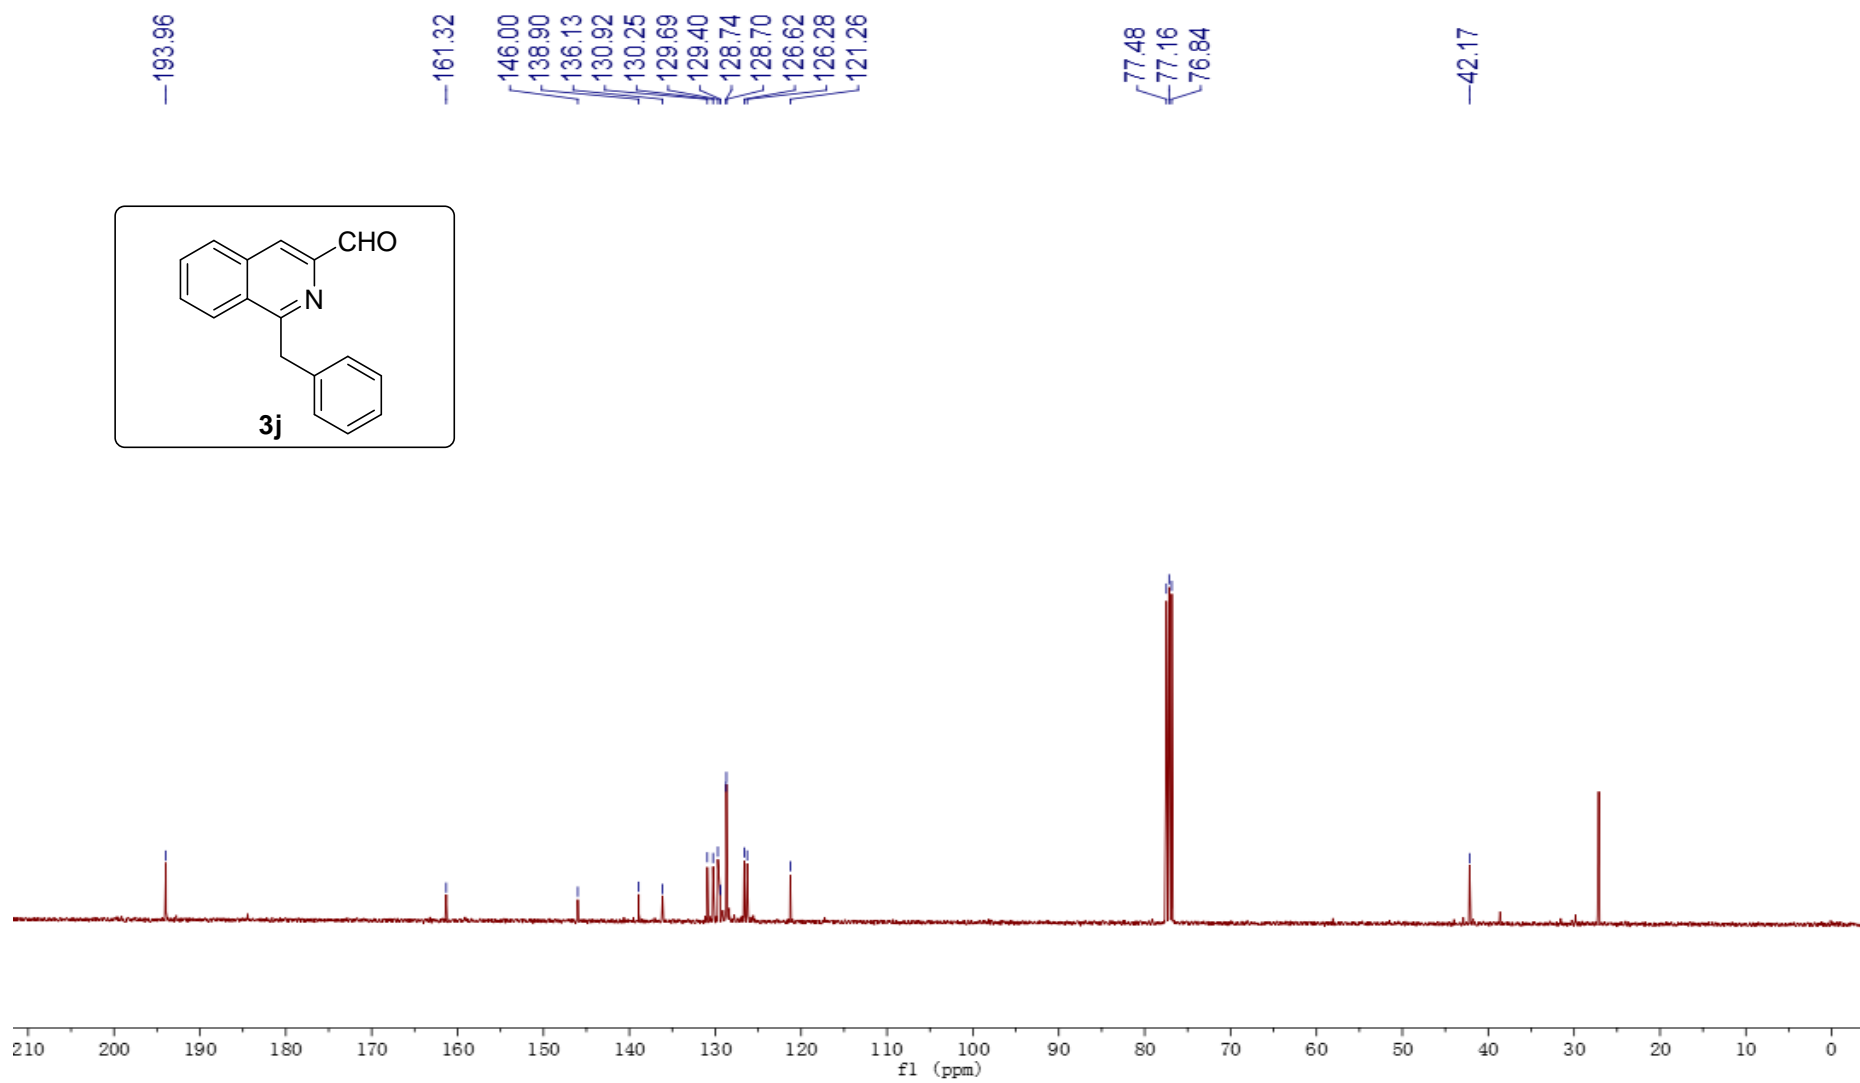

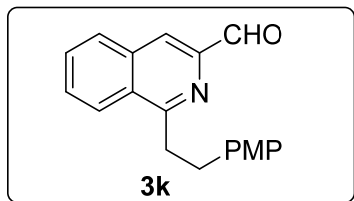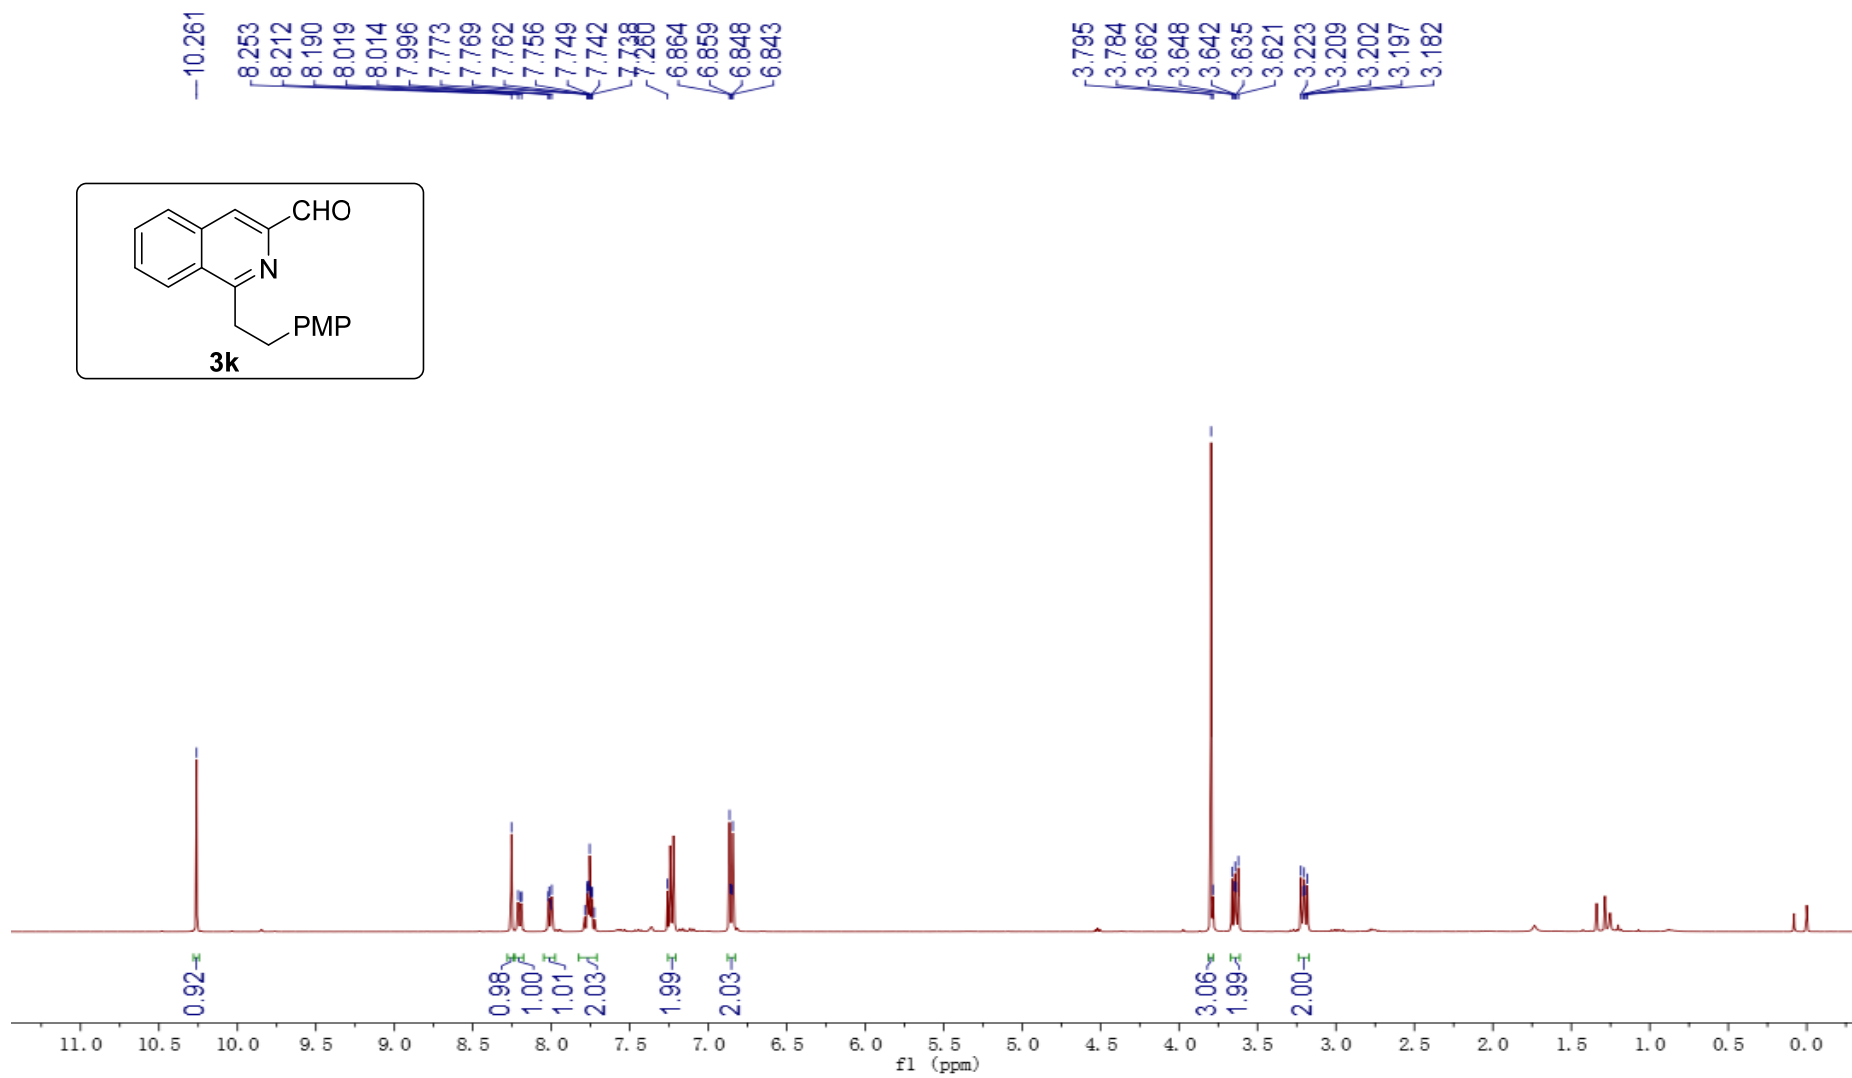

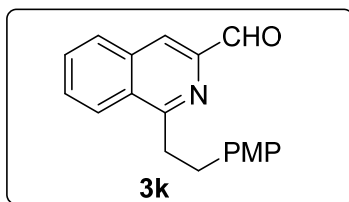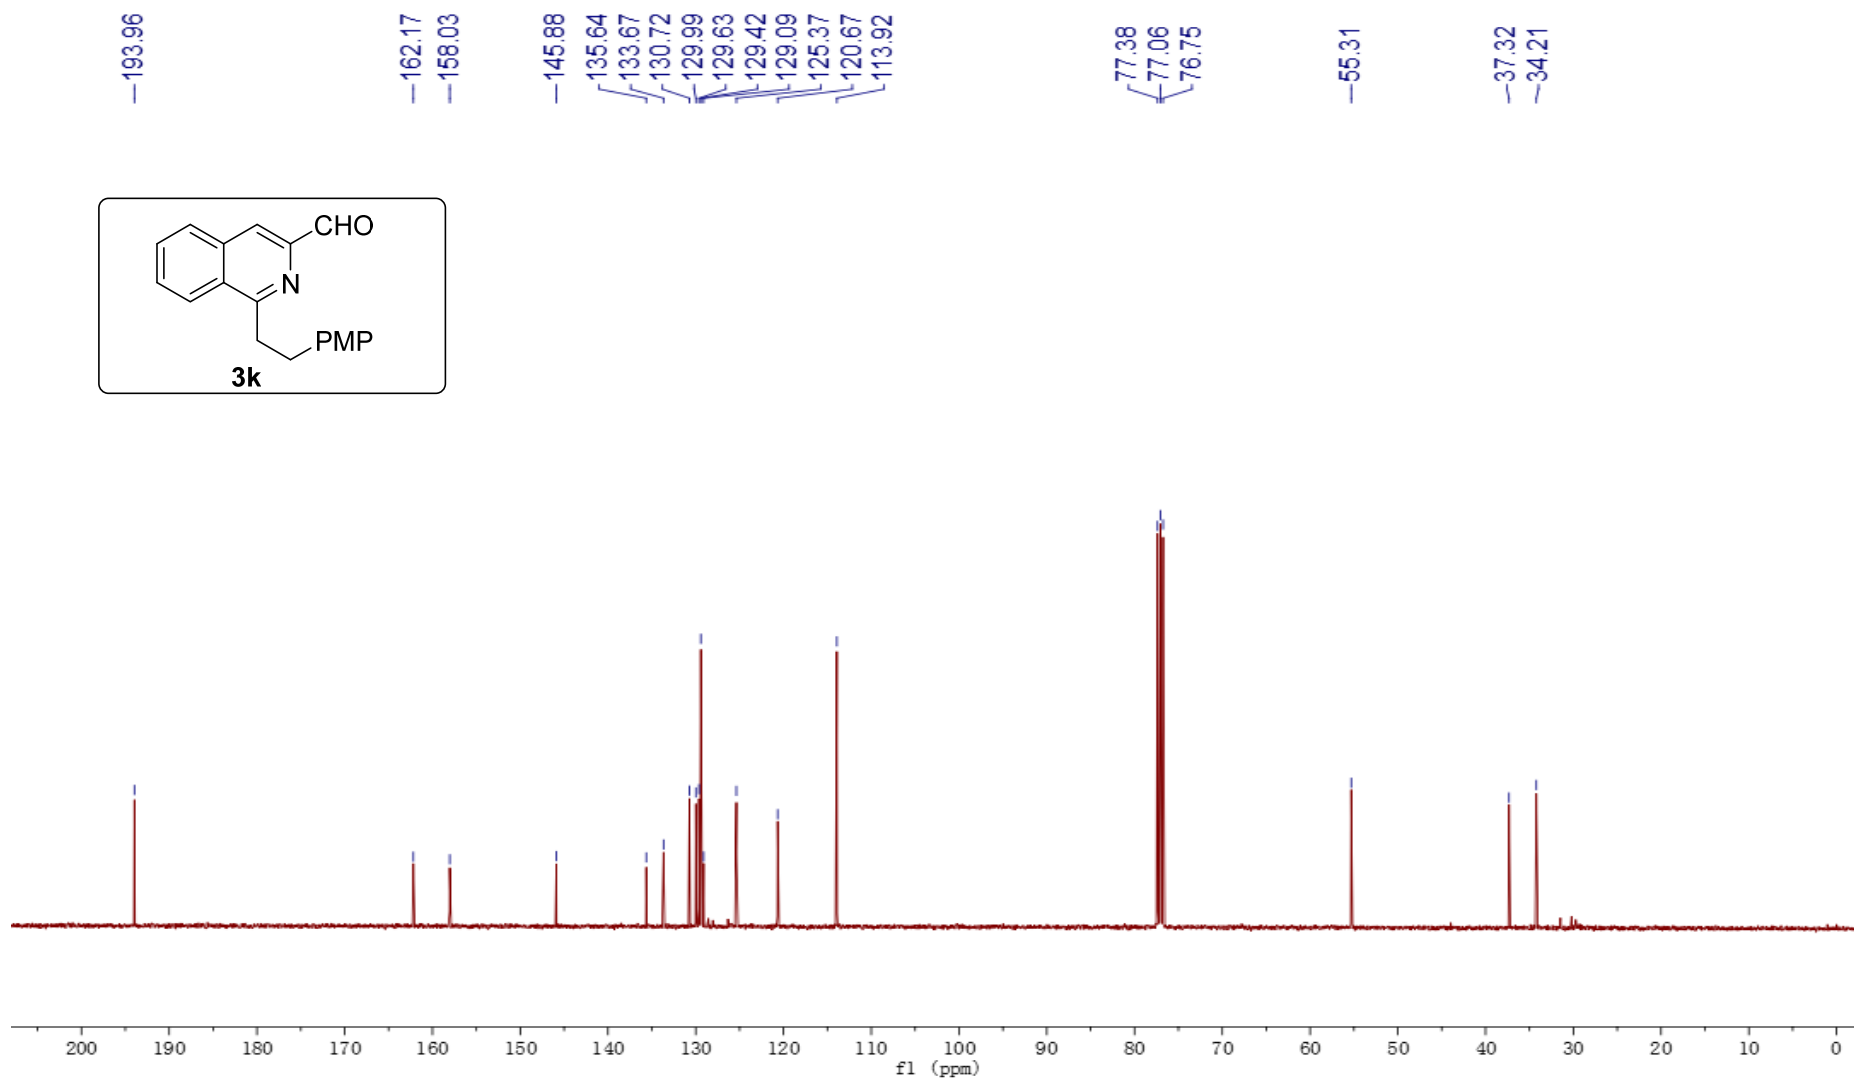

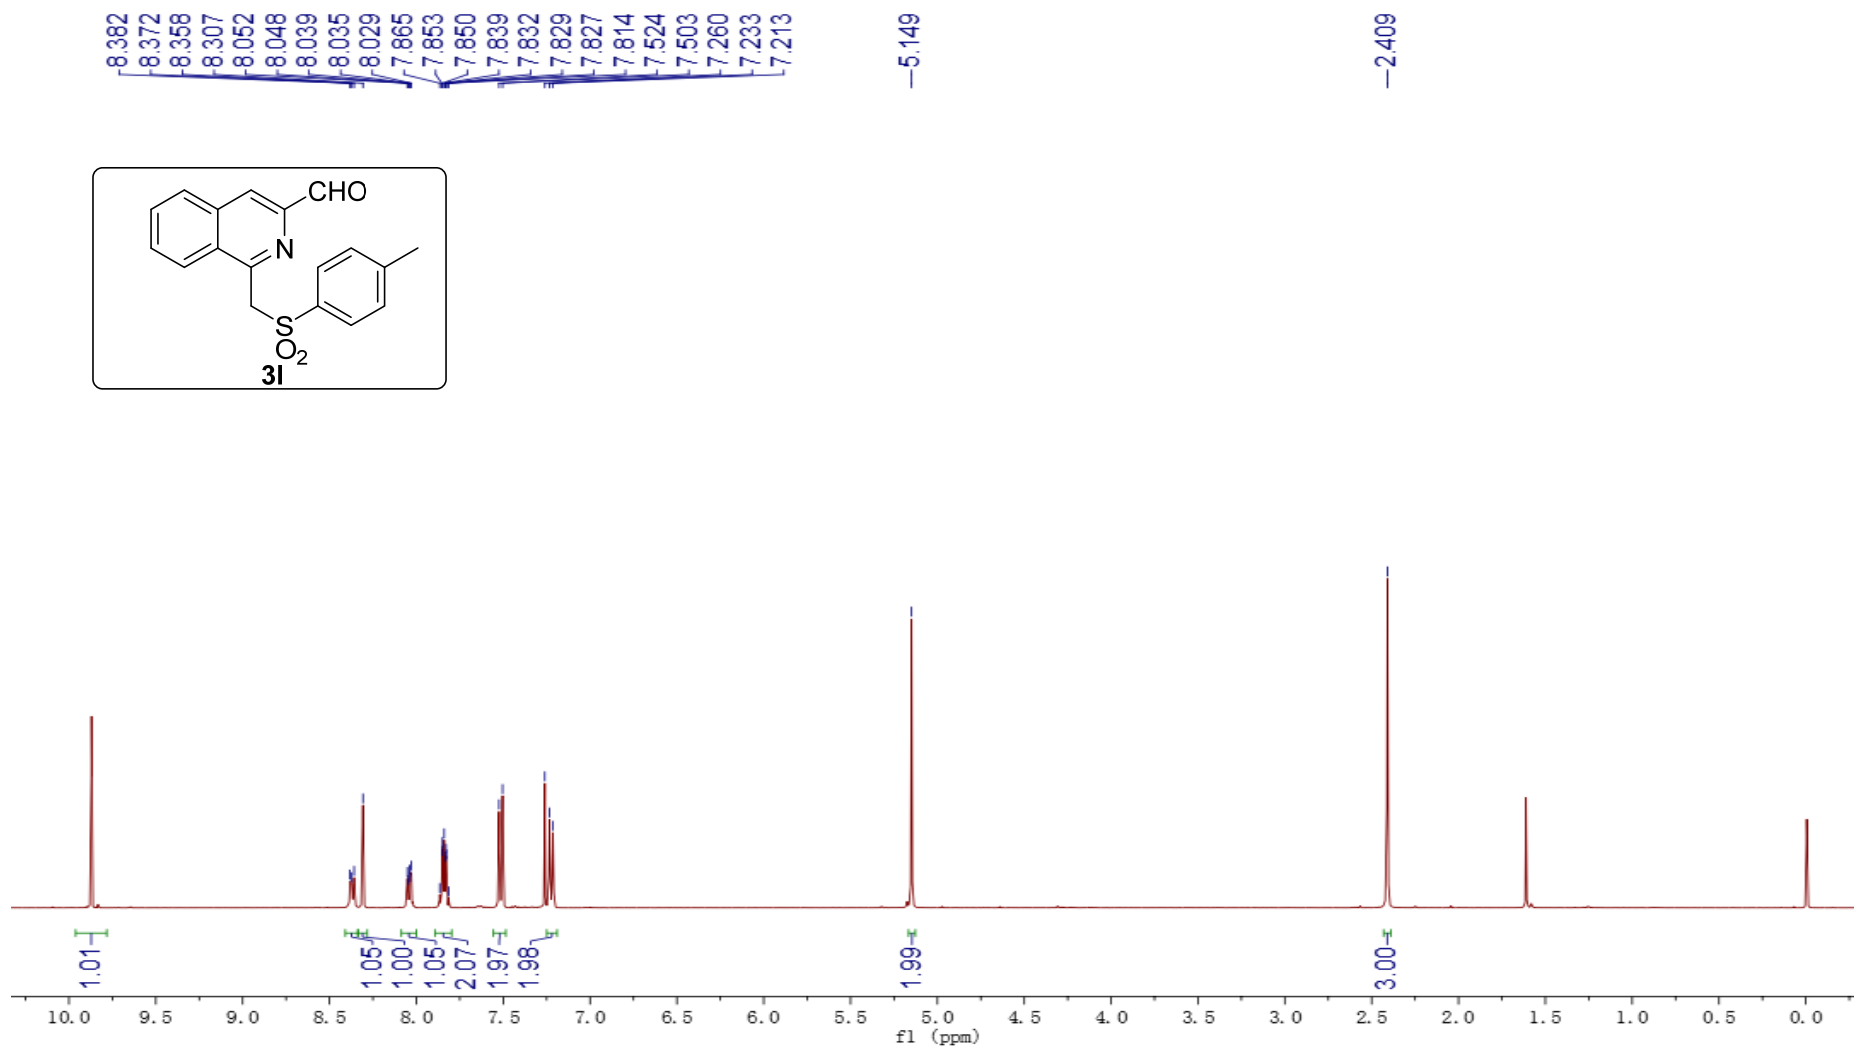

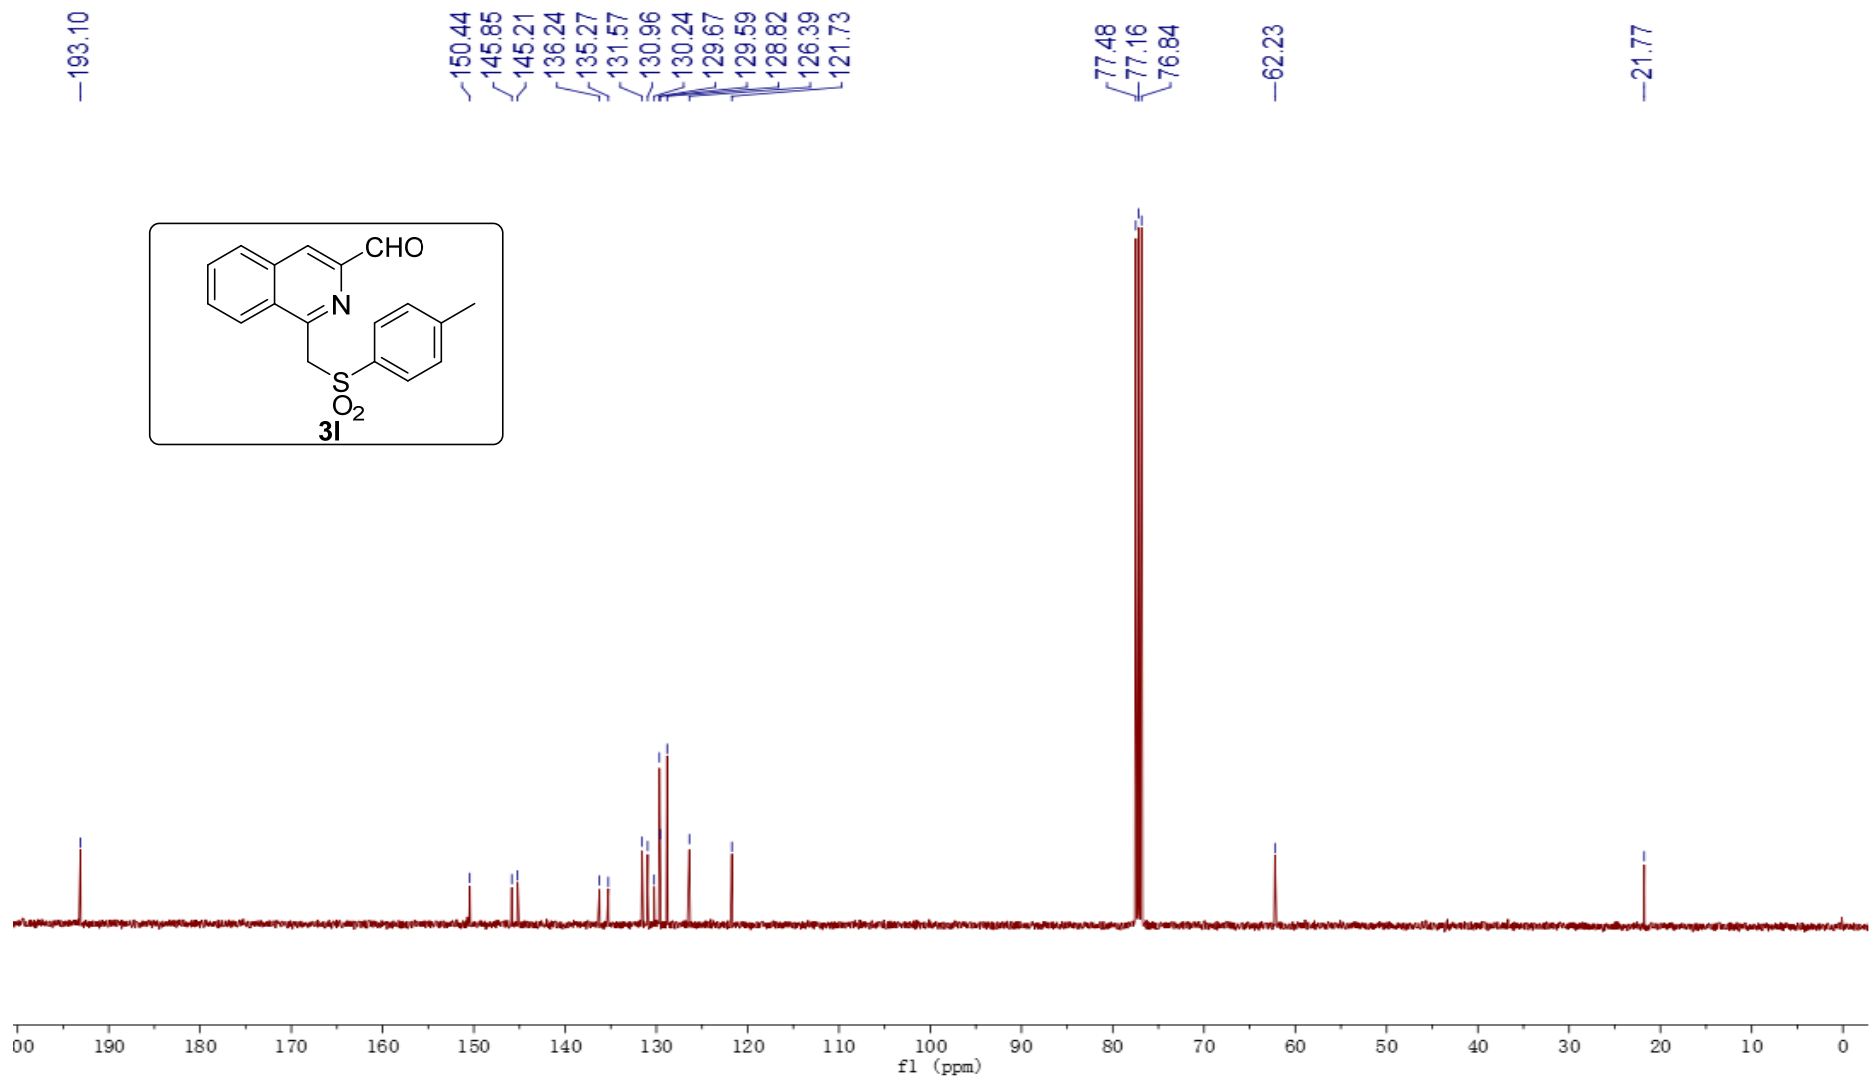

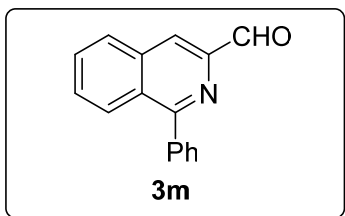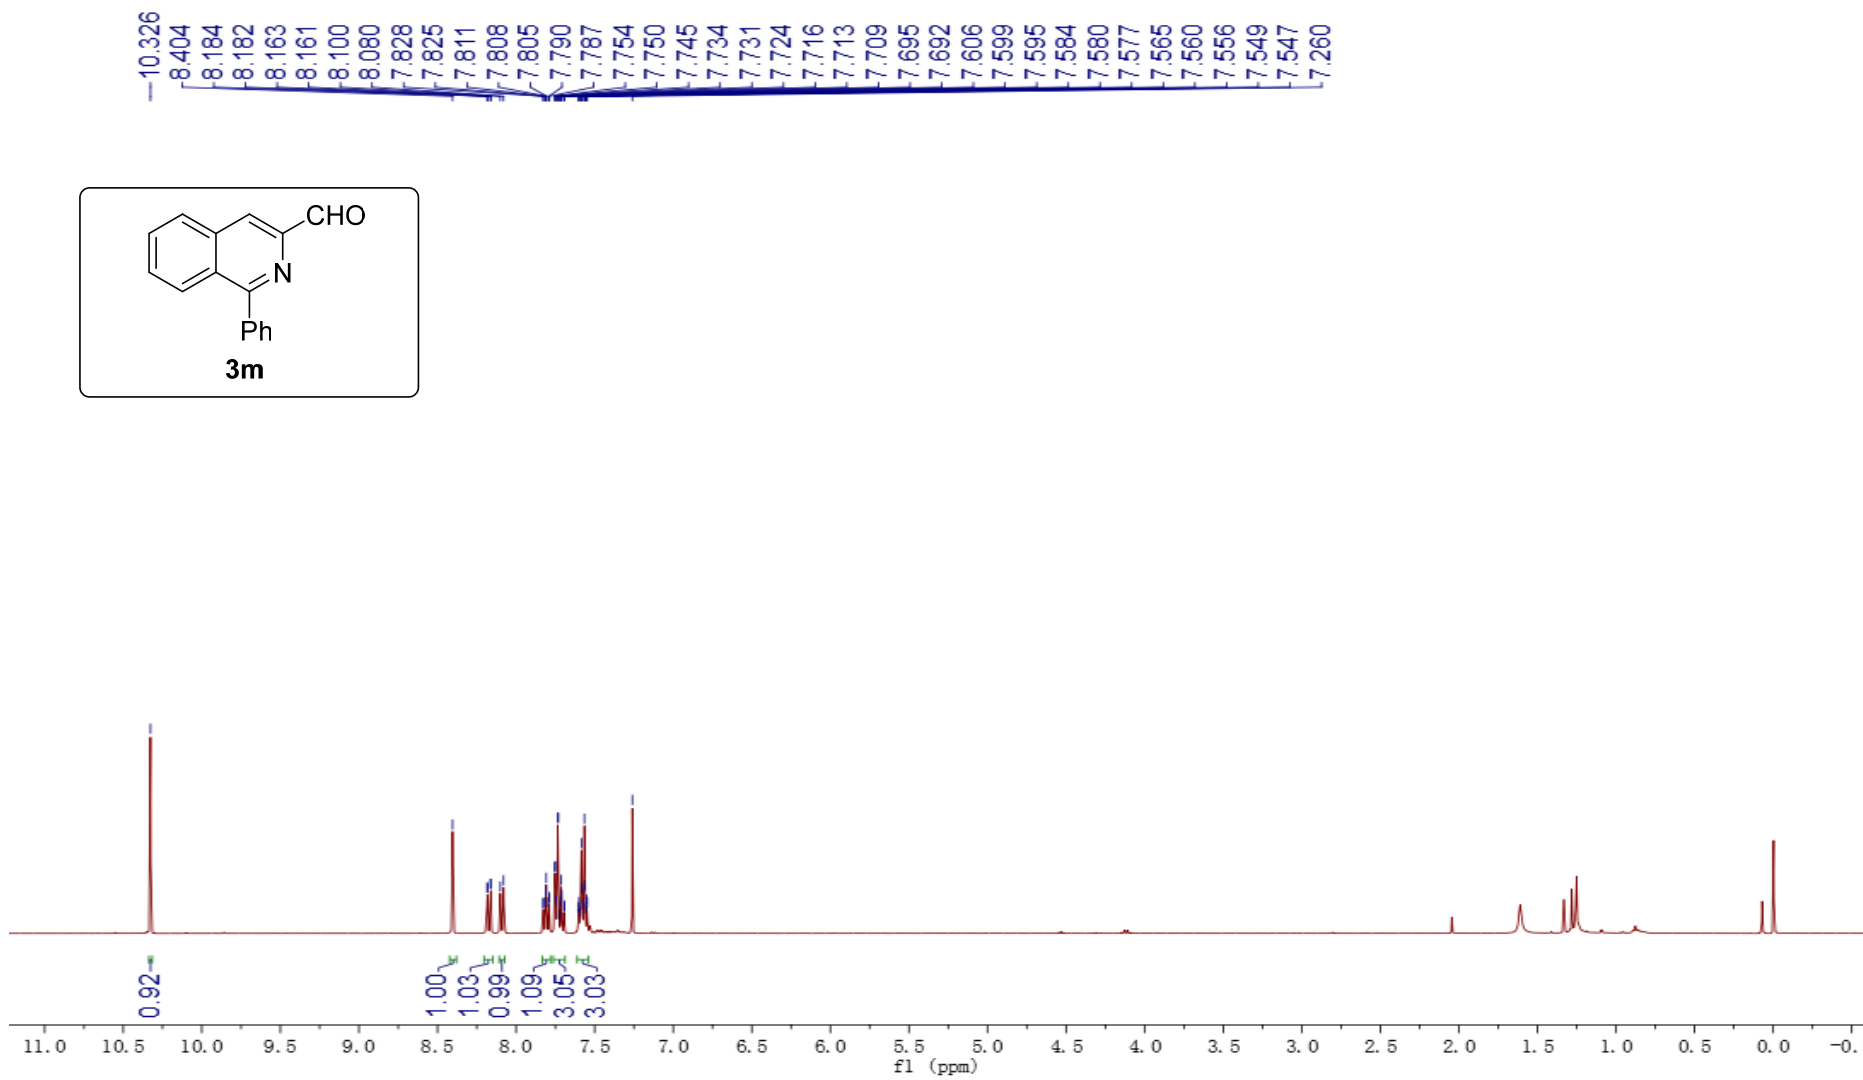



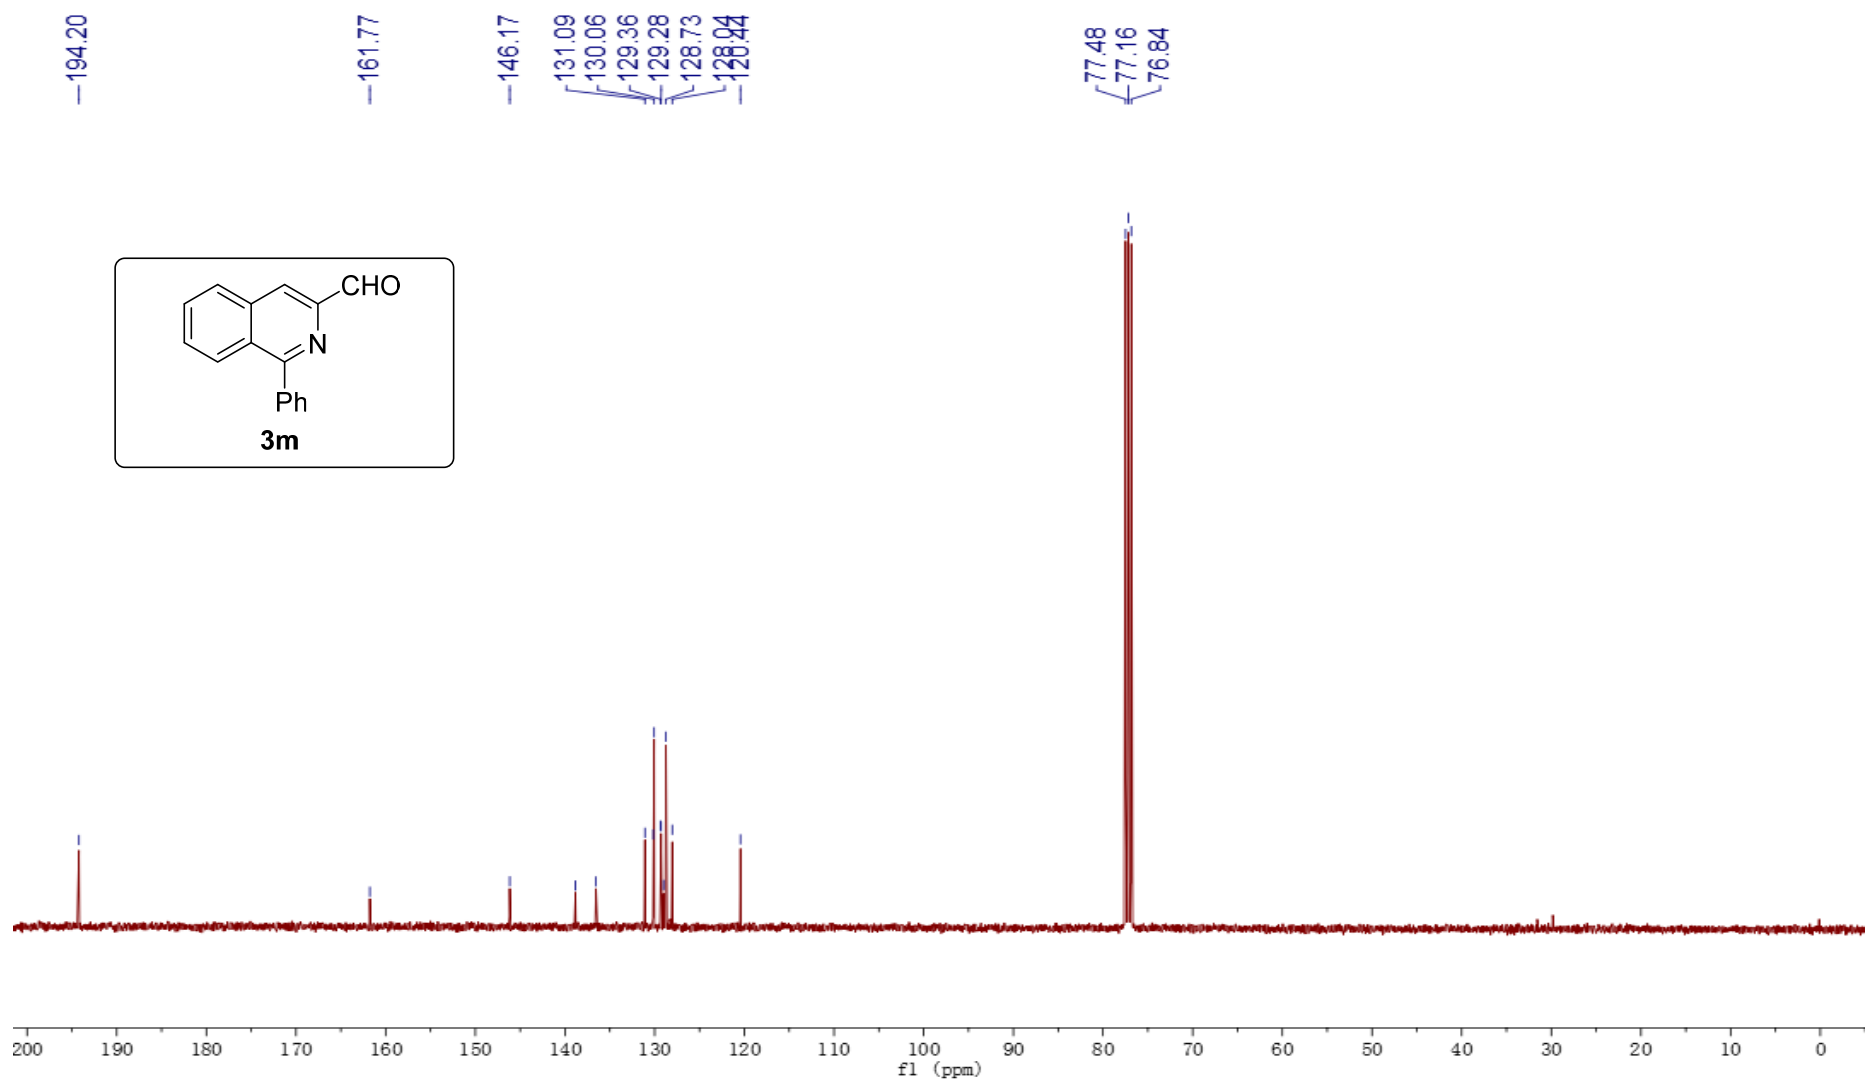

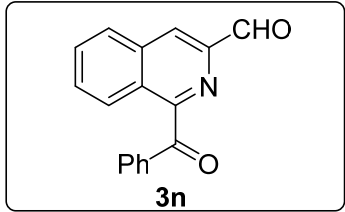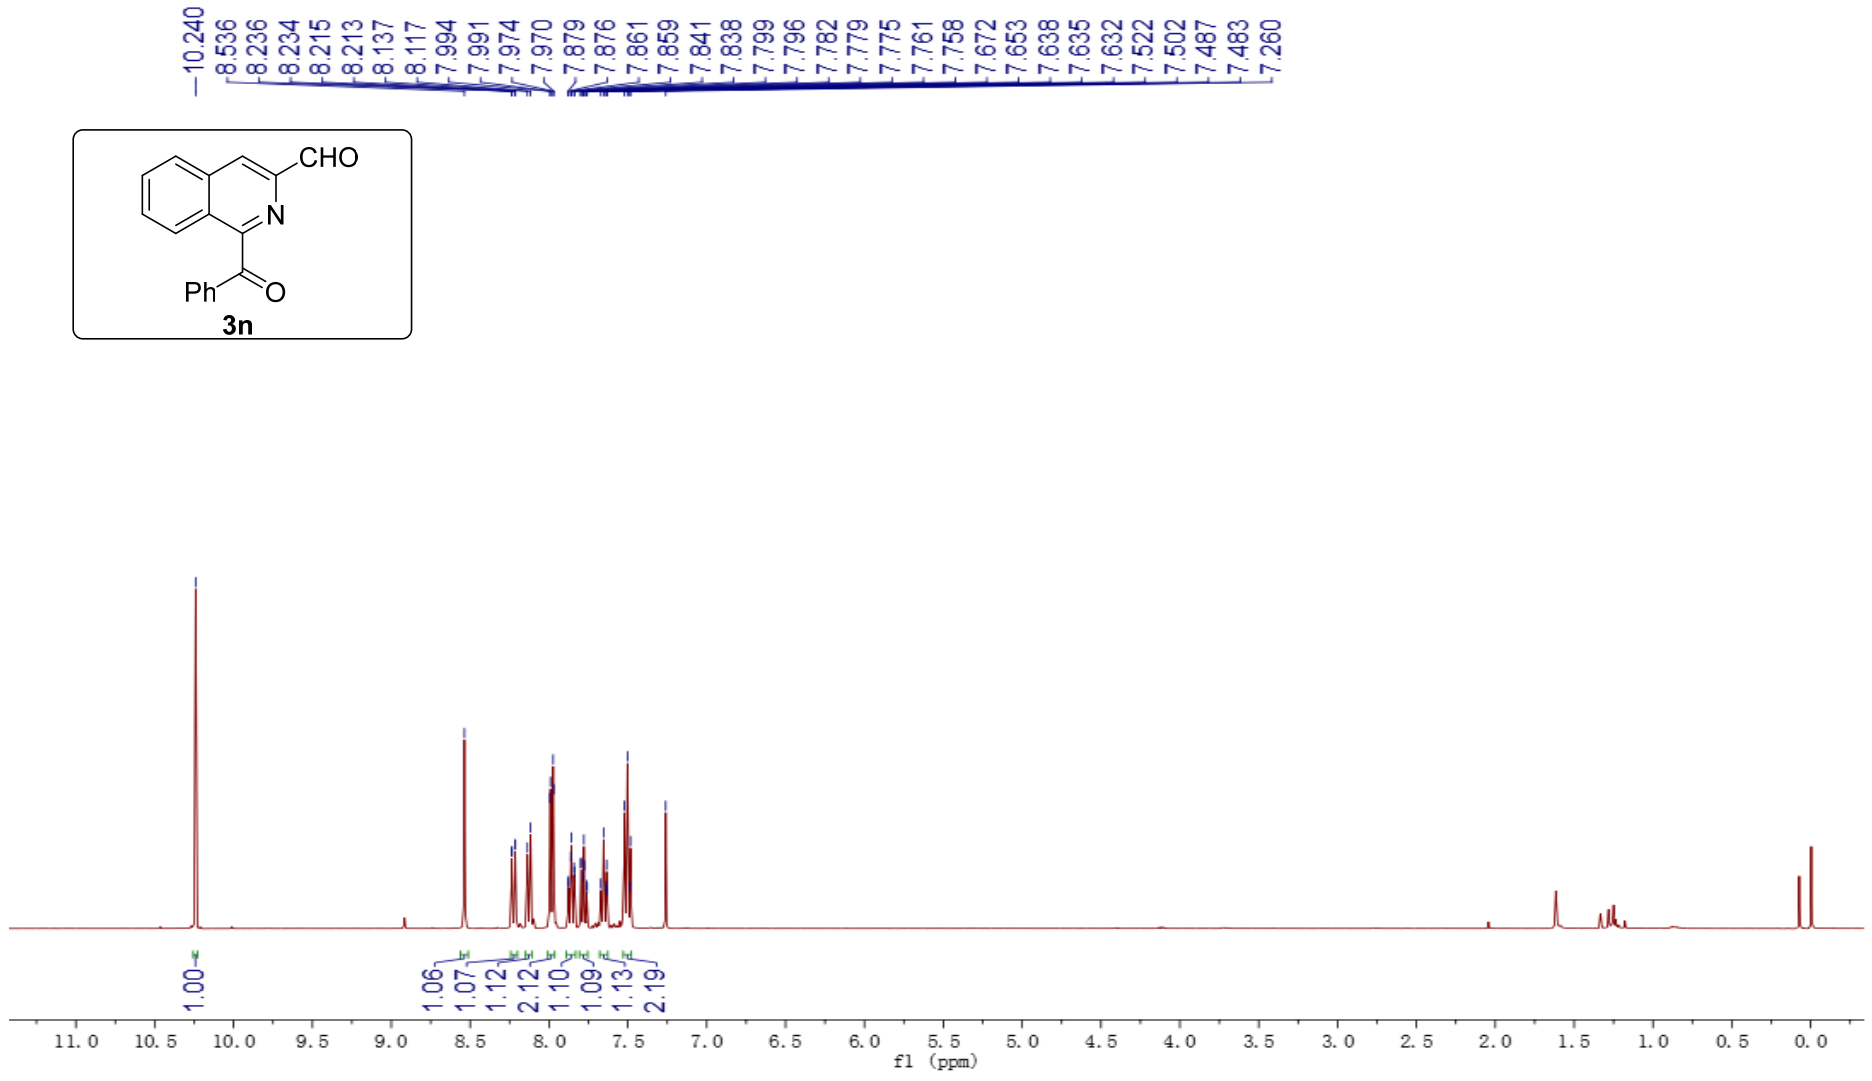

194.17  
193.26

157.48

145.21  
136.42  
136.13  
134.28  
131.82  
131.15  
130.94  
129.45  
128.75  
128.34  
126.63  
122.49

77.48  
77.16  
76.84

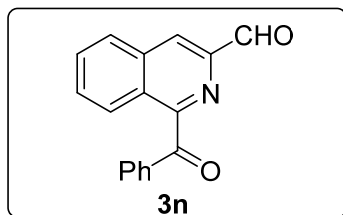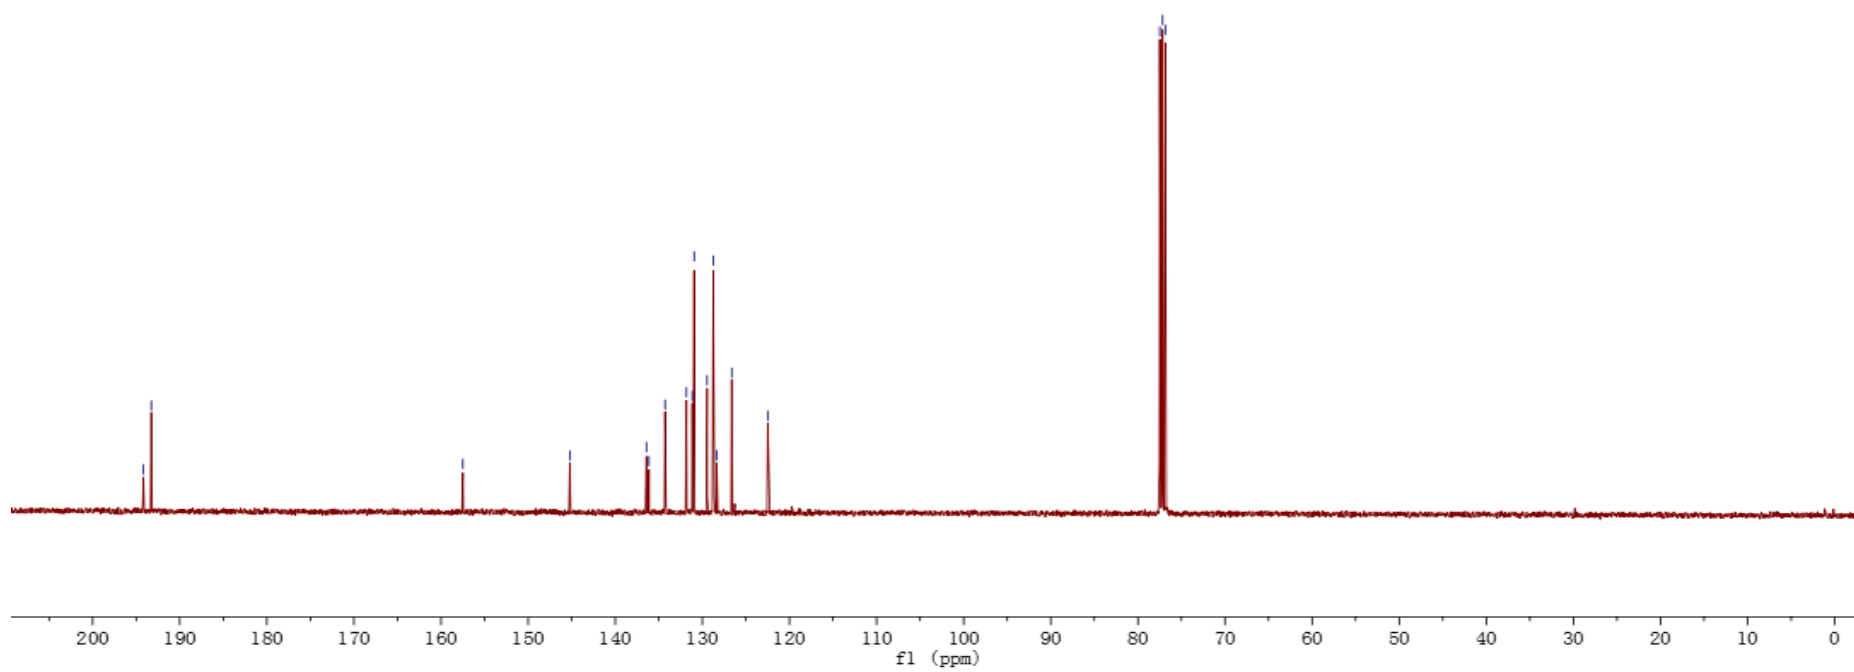

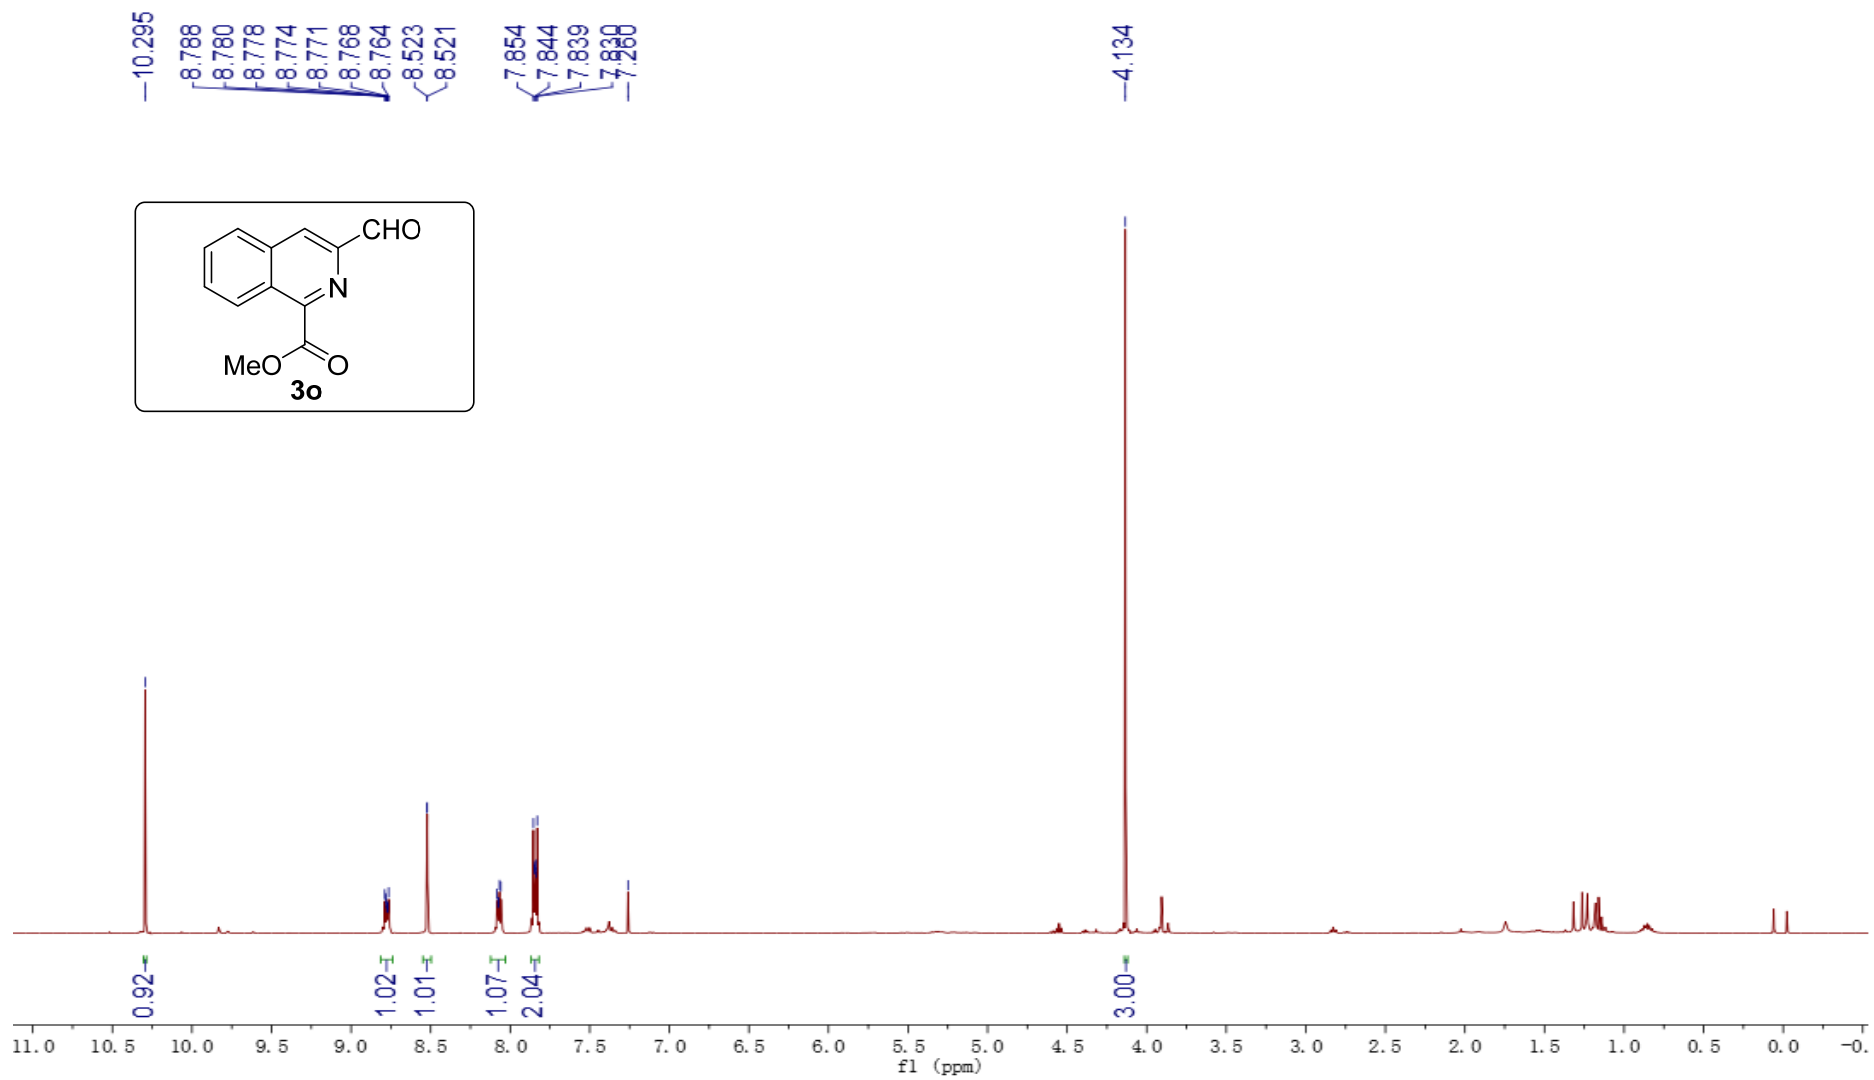

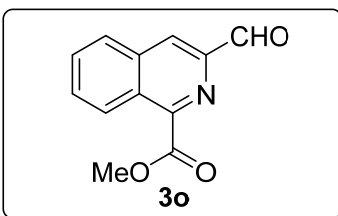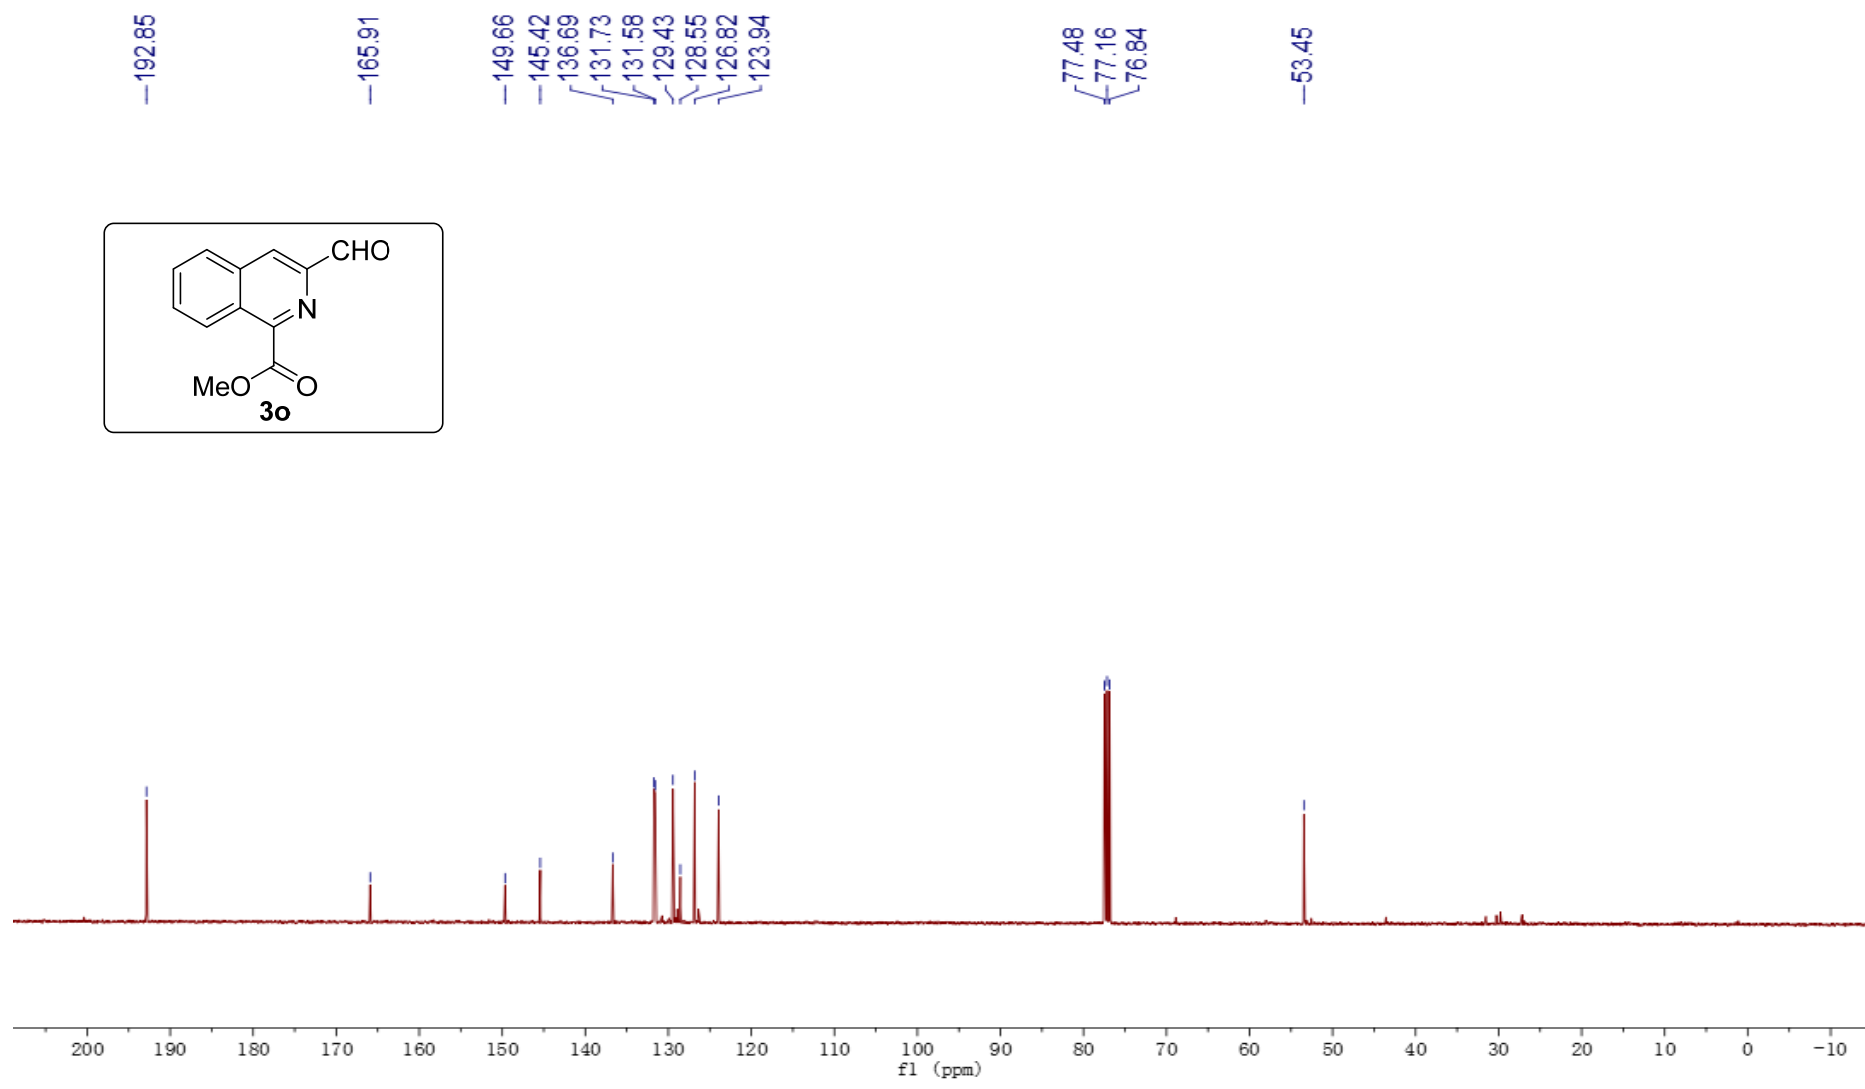

-10.201

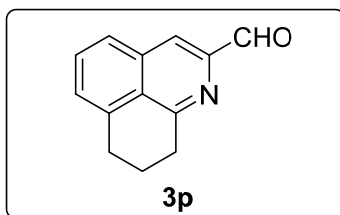

8.189  
7.824  
7.804  
7.690  
7.672  
7.652  
7.517  
7.500  
7.260

3.352  
3.336  
3.321  
3.182  
3.167  
3.151  
2.265  
2.249  
2.234  
2.218  
2.203

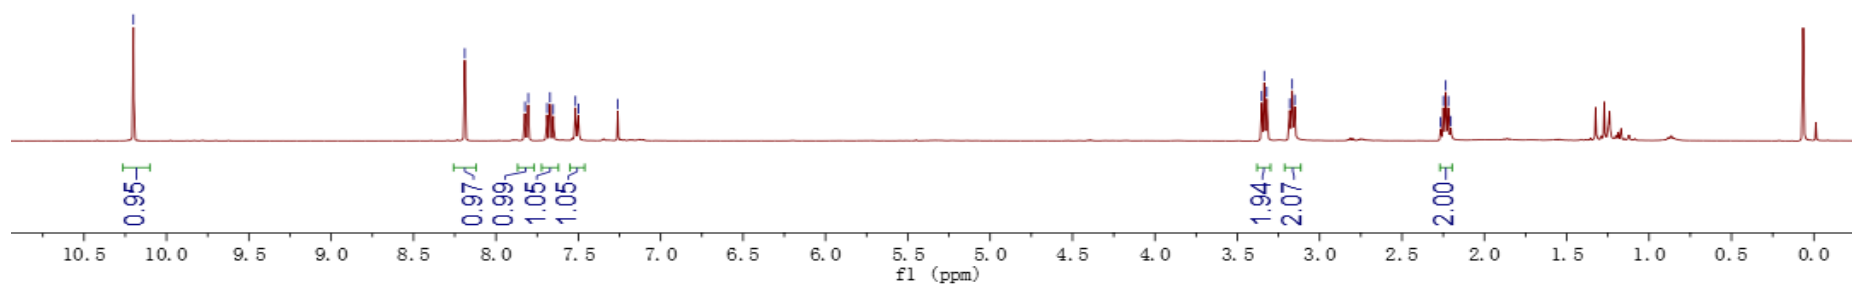

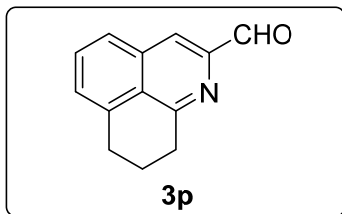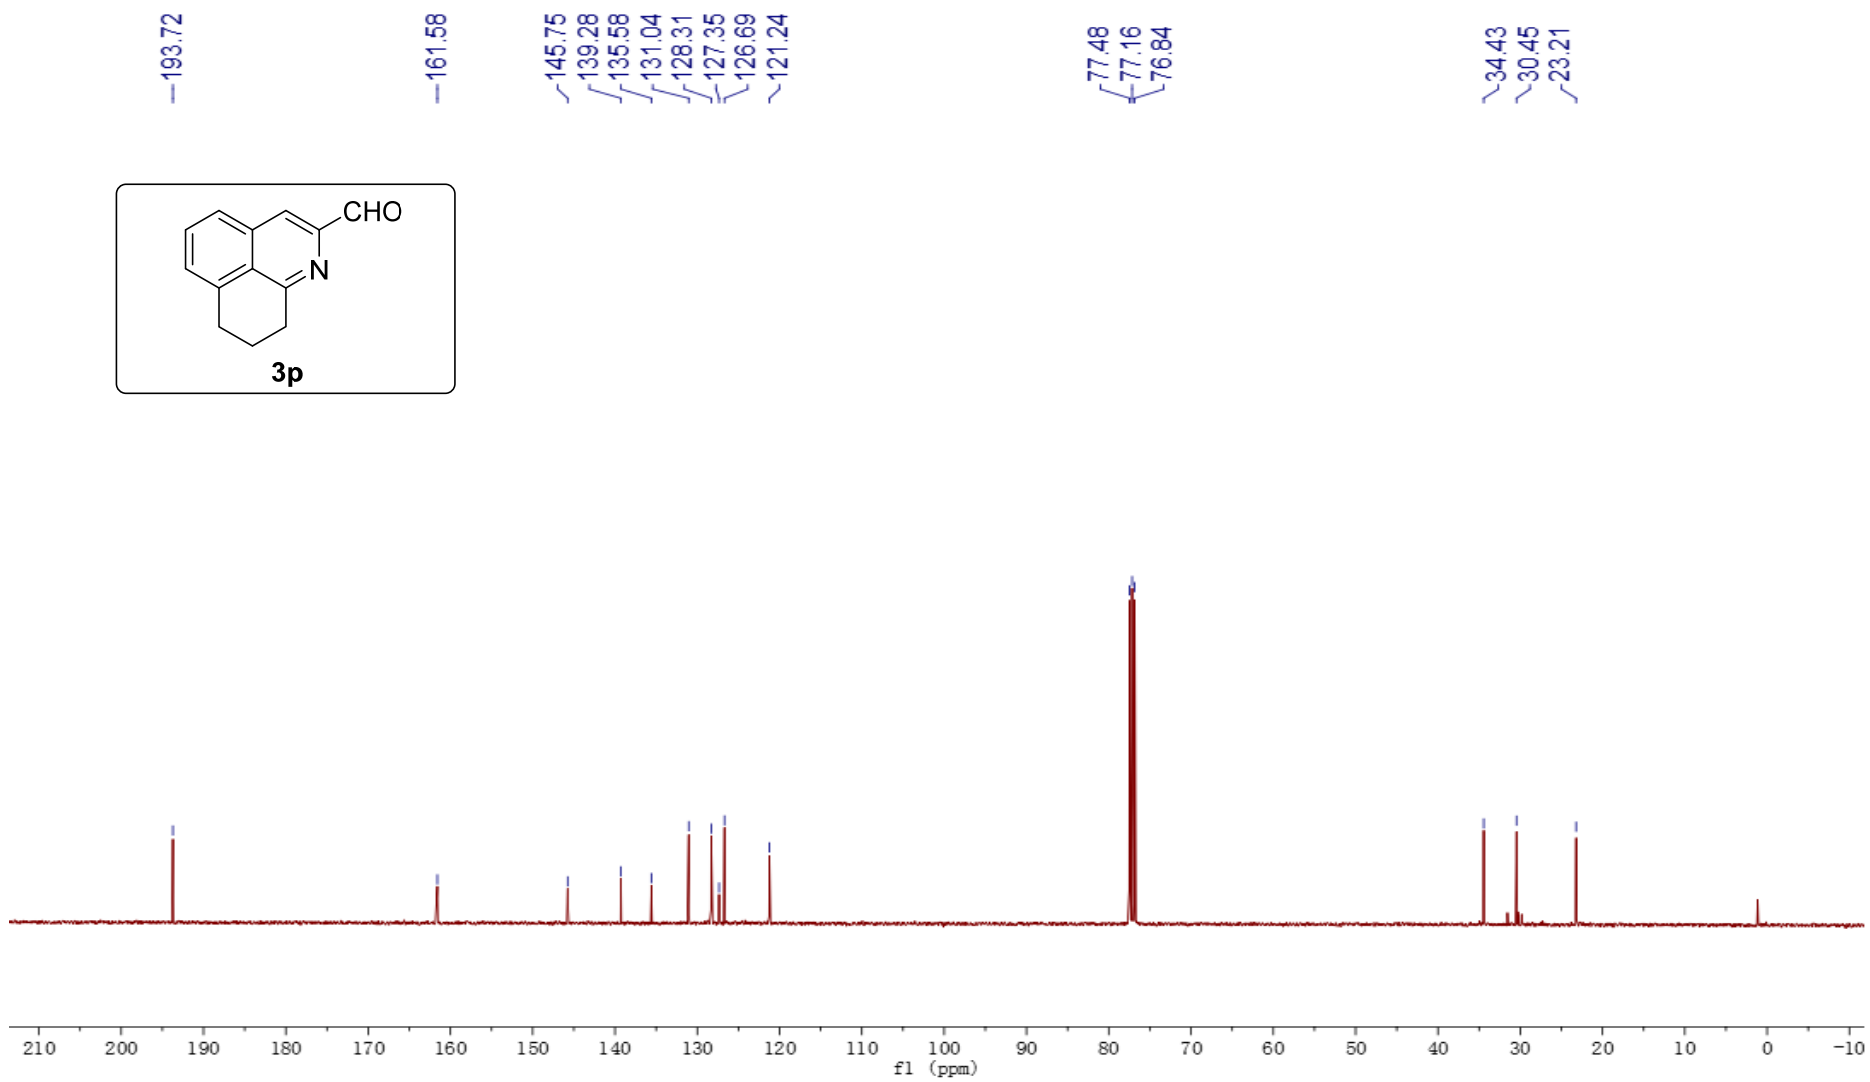

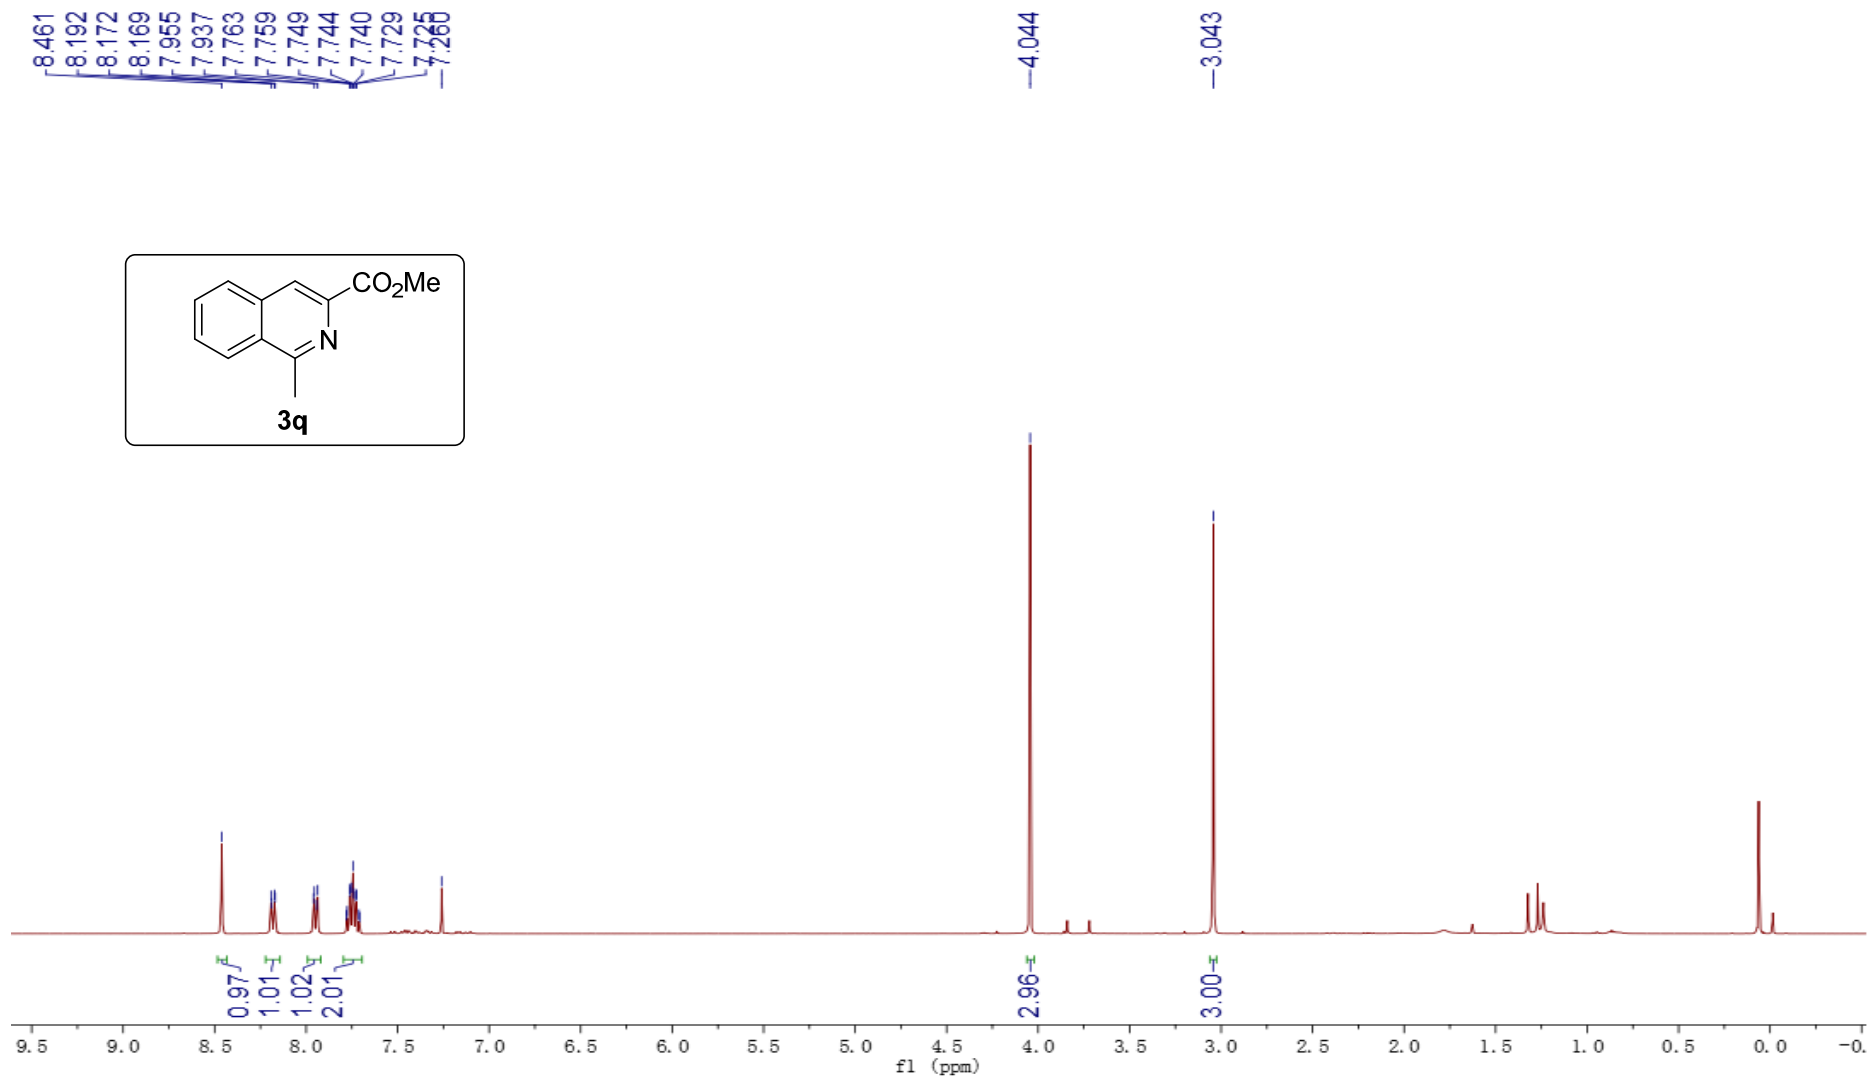



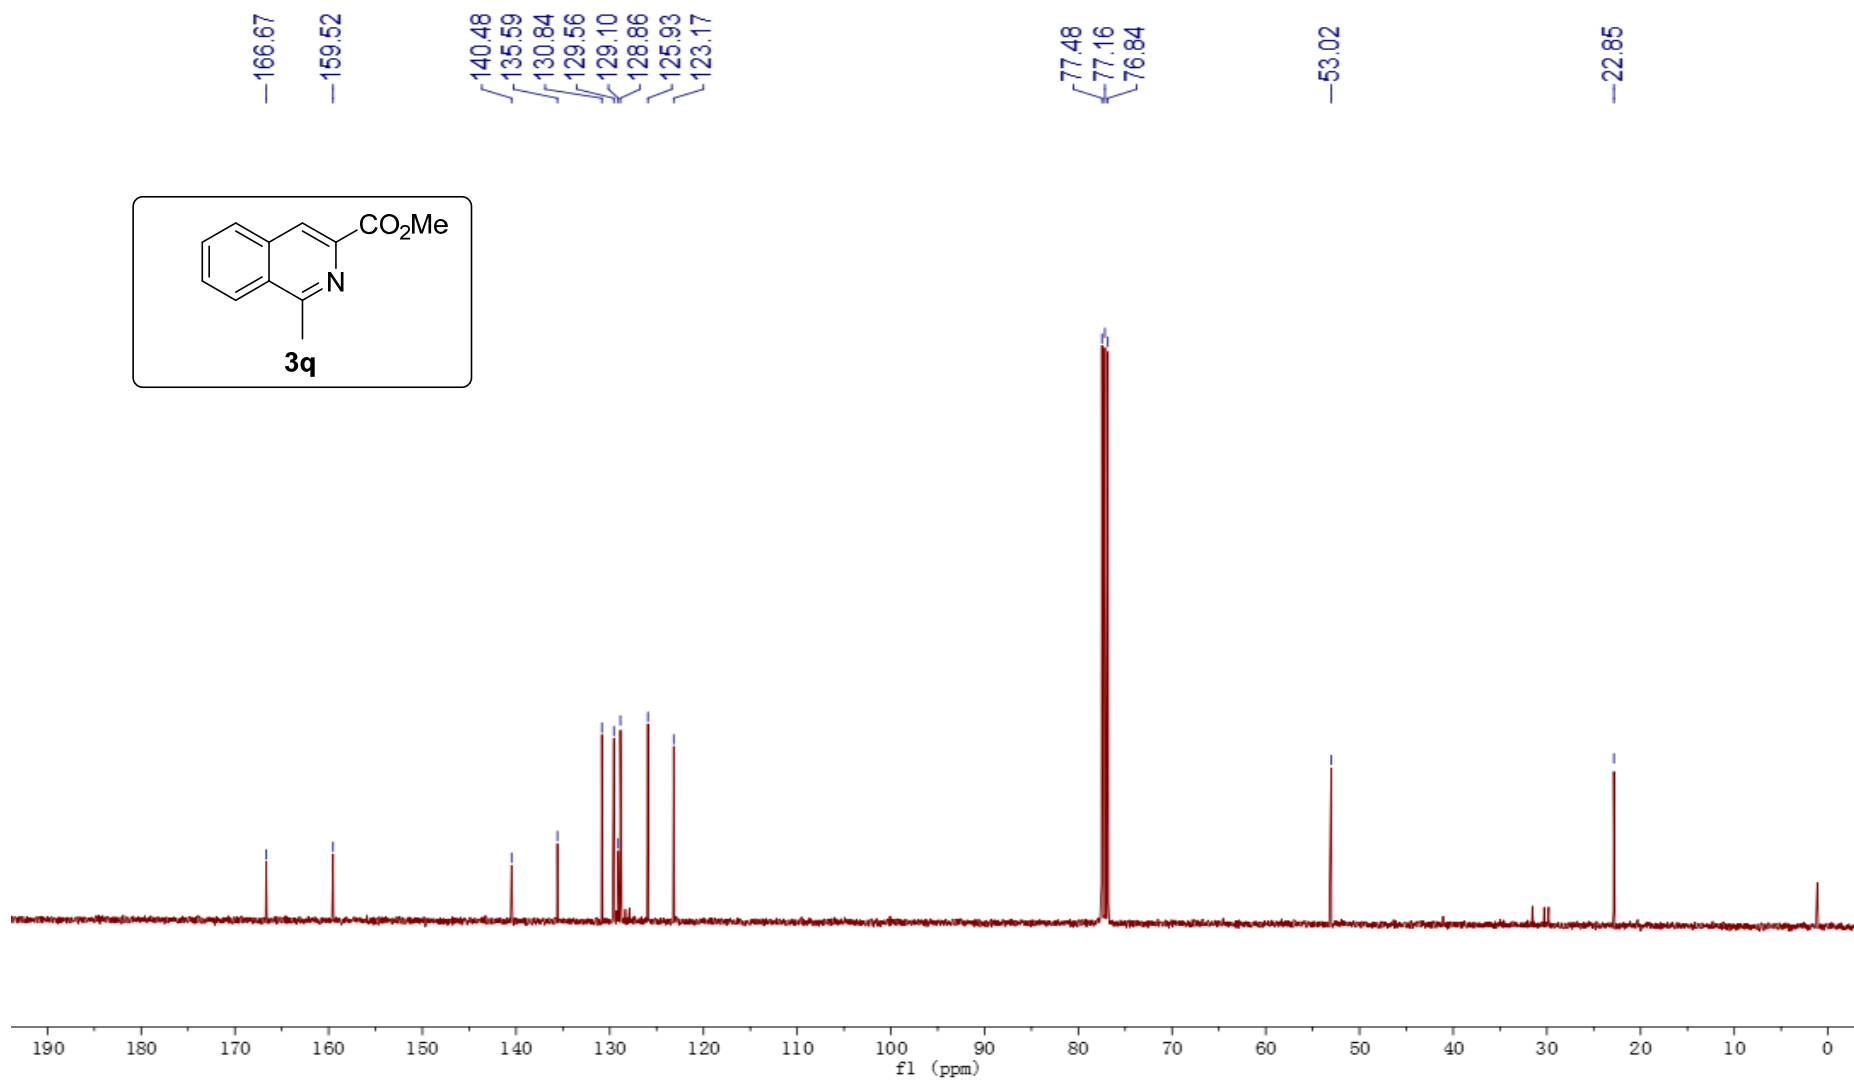

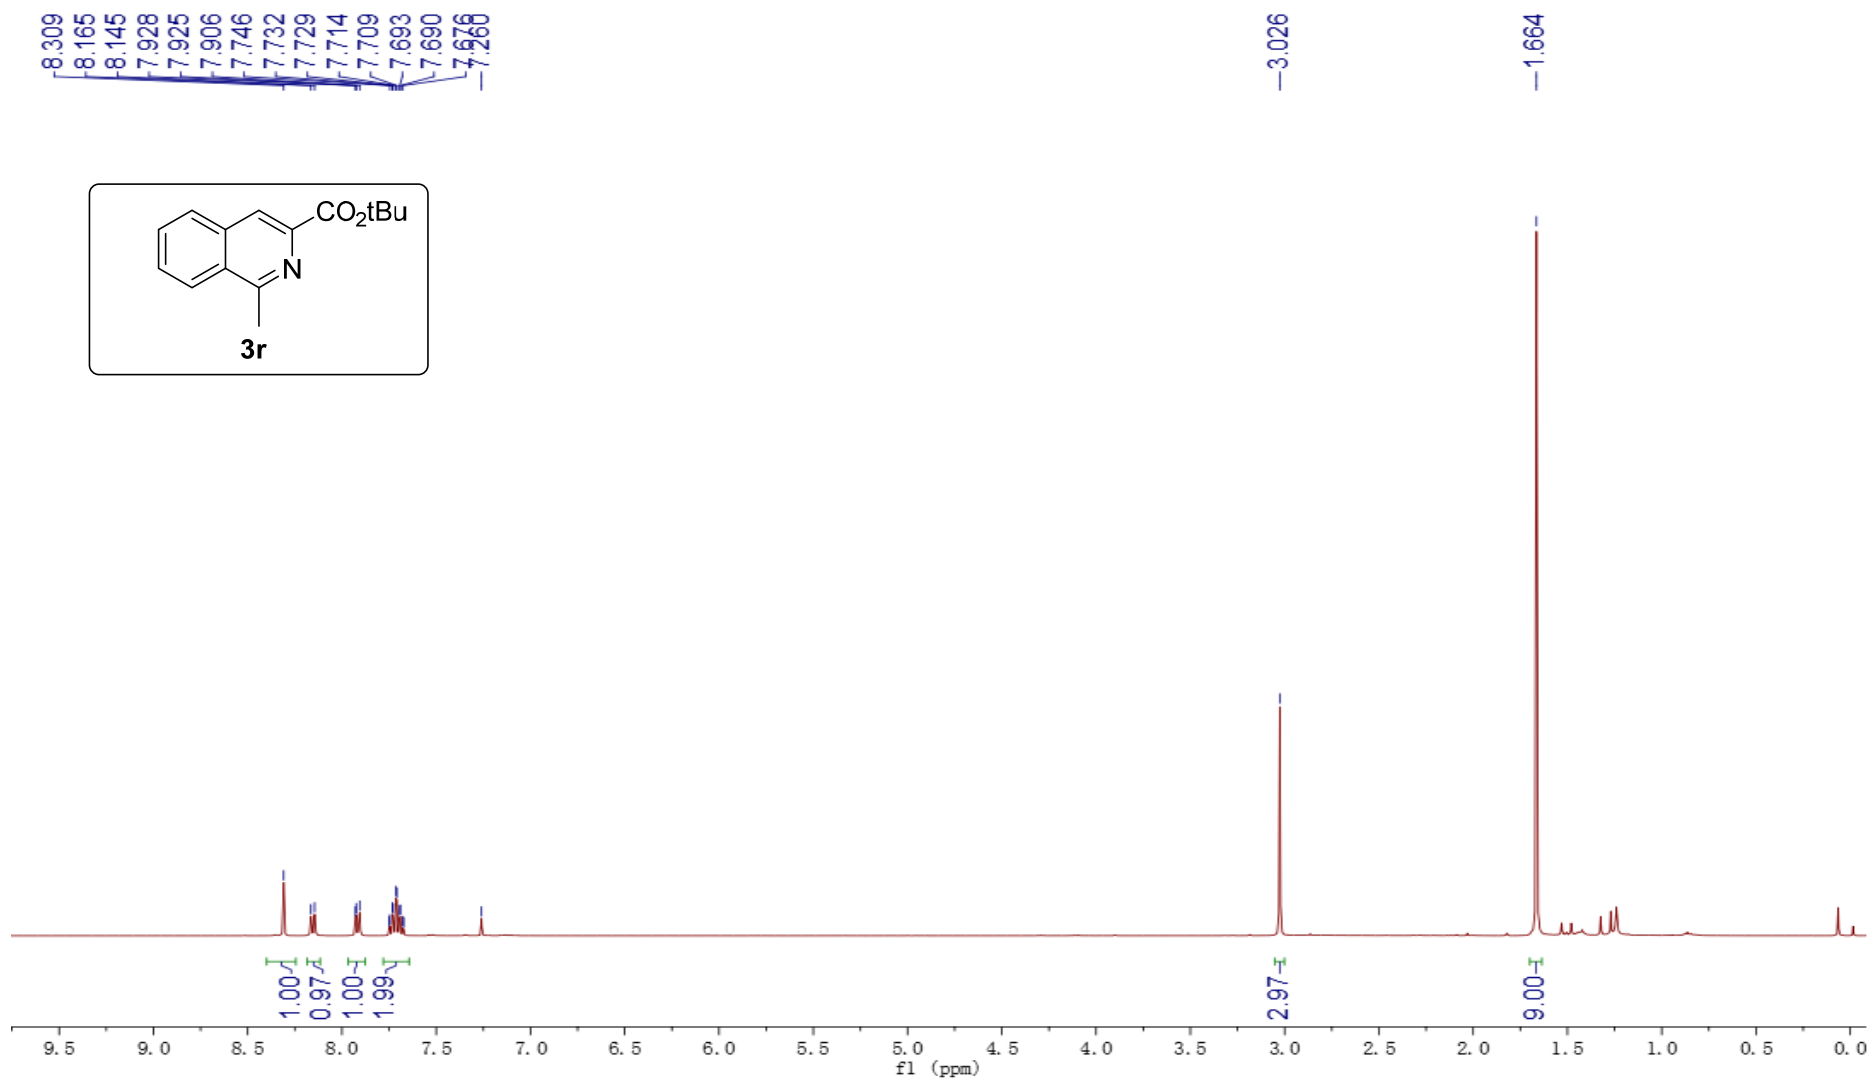

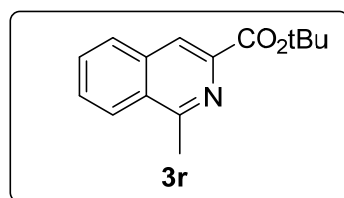

—164.91

—159.41

141.74

135.65

130.60

129.20

128.88

128.71

125.88

122.31

81.89

77.48

77.16

76.84

—28.31

—22.79

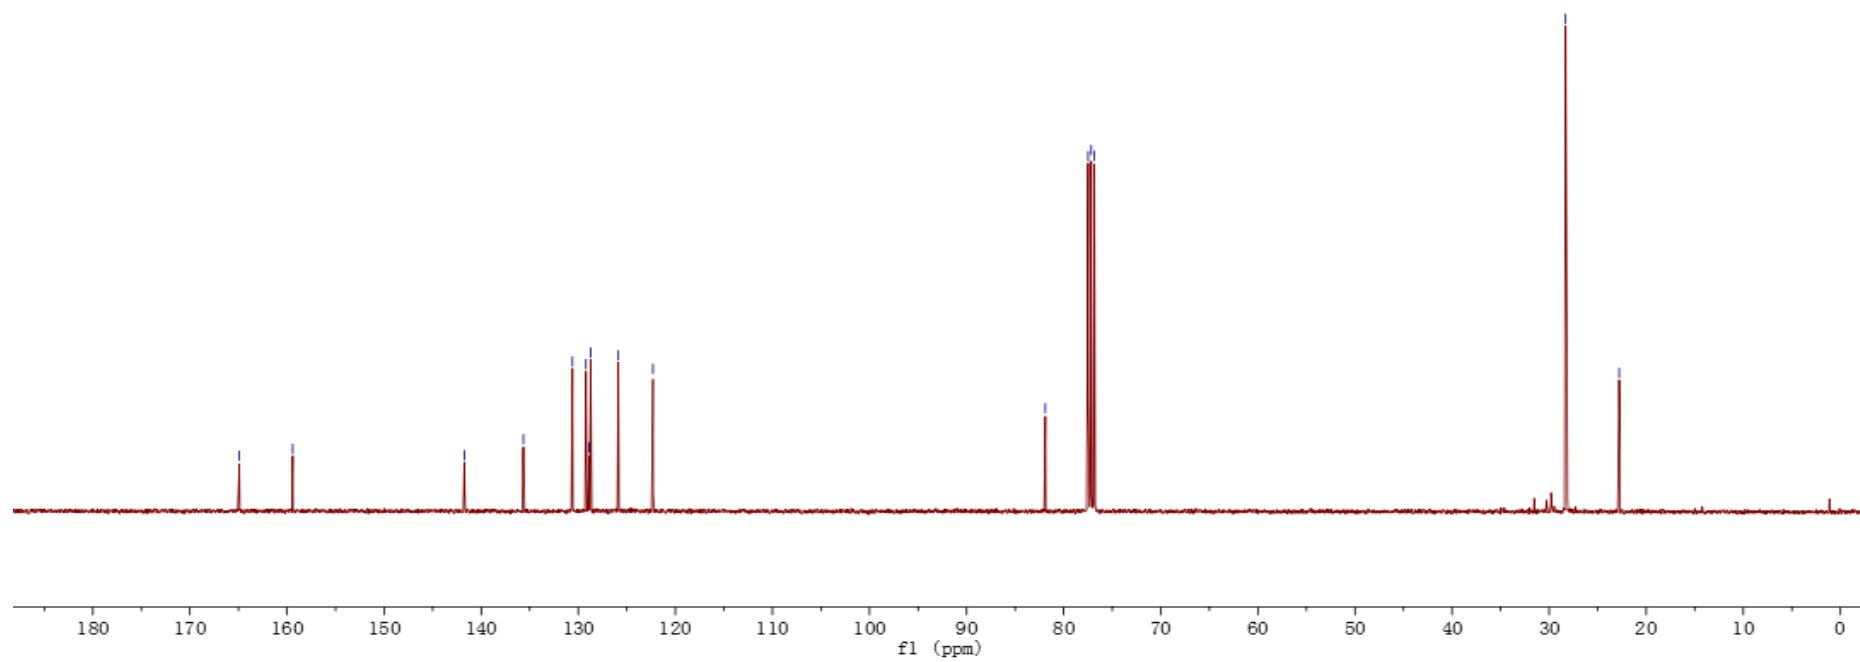

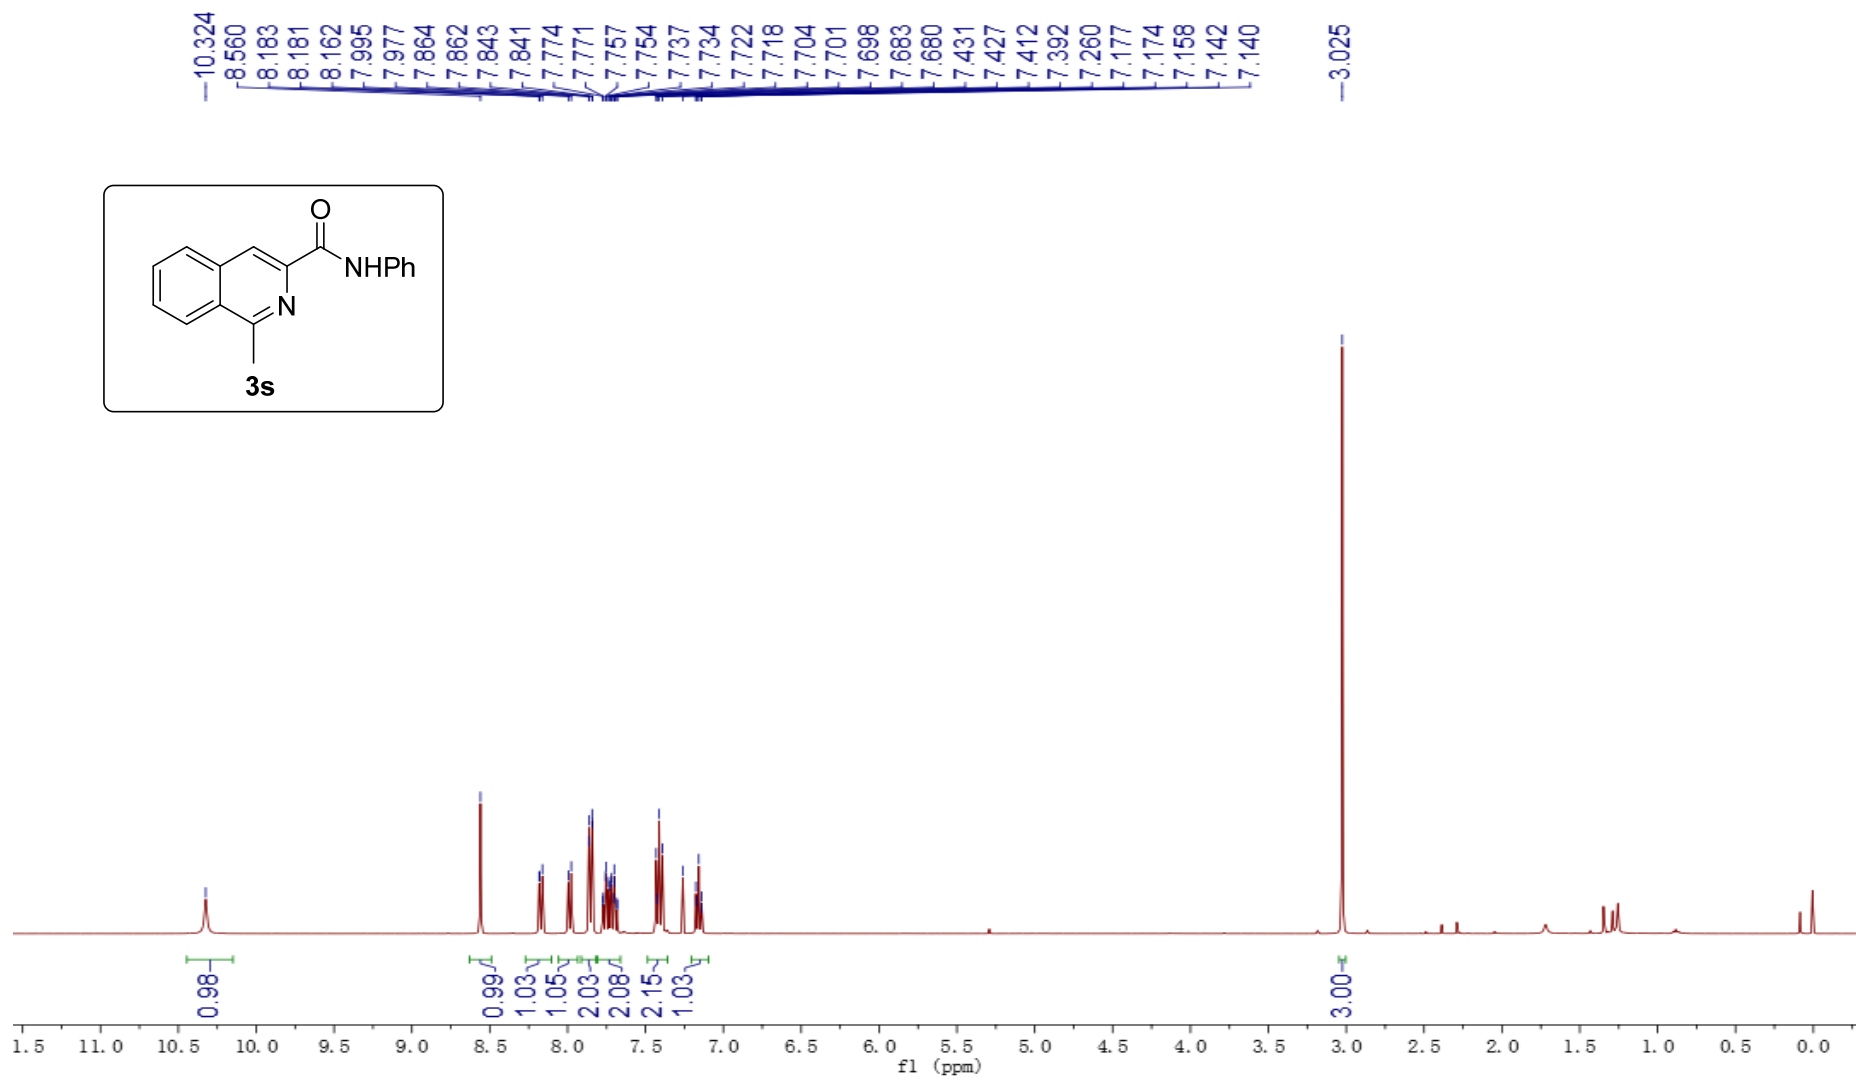

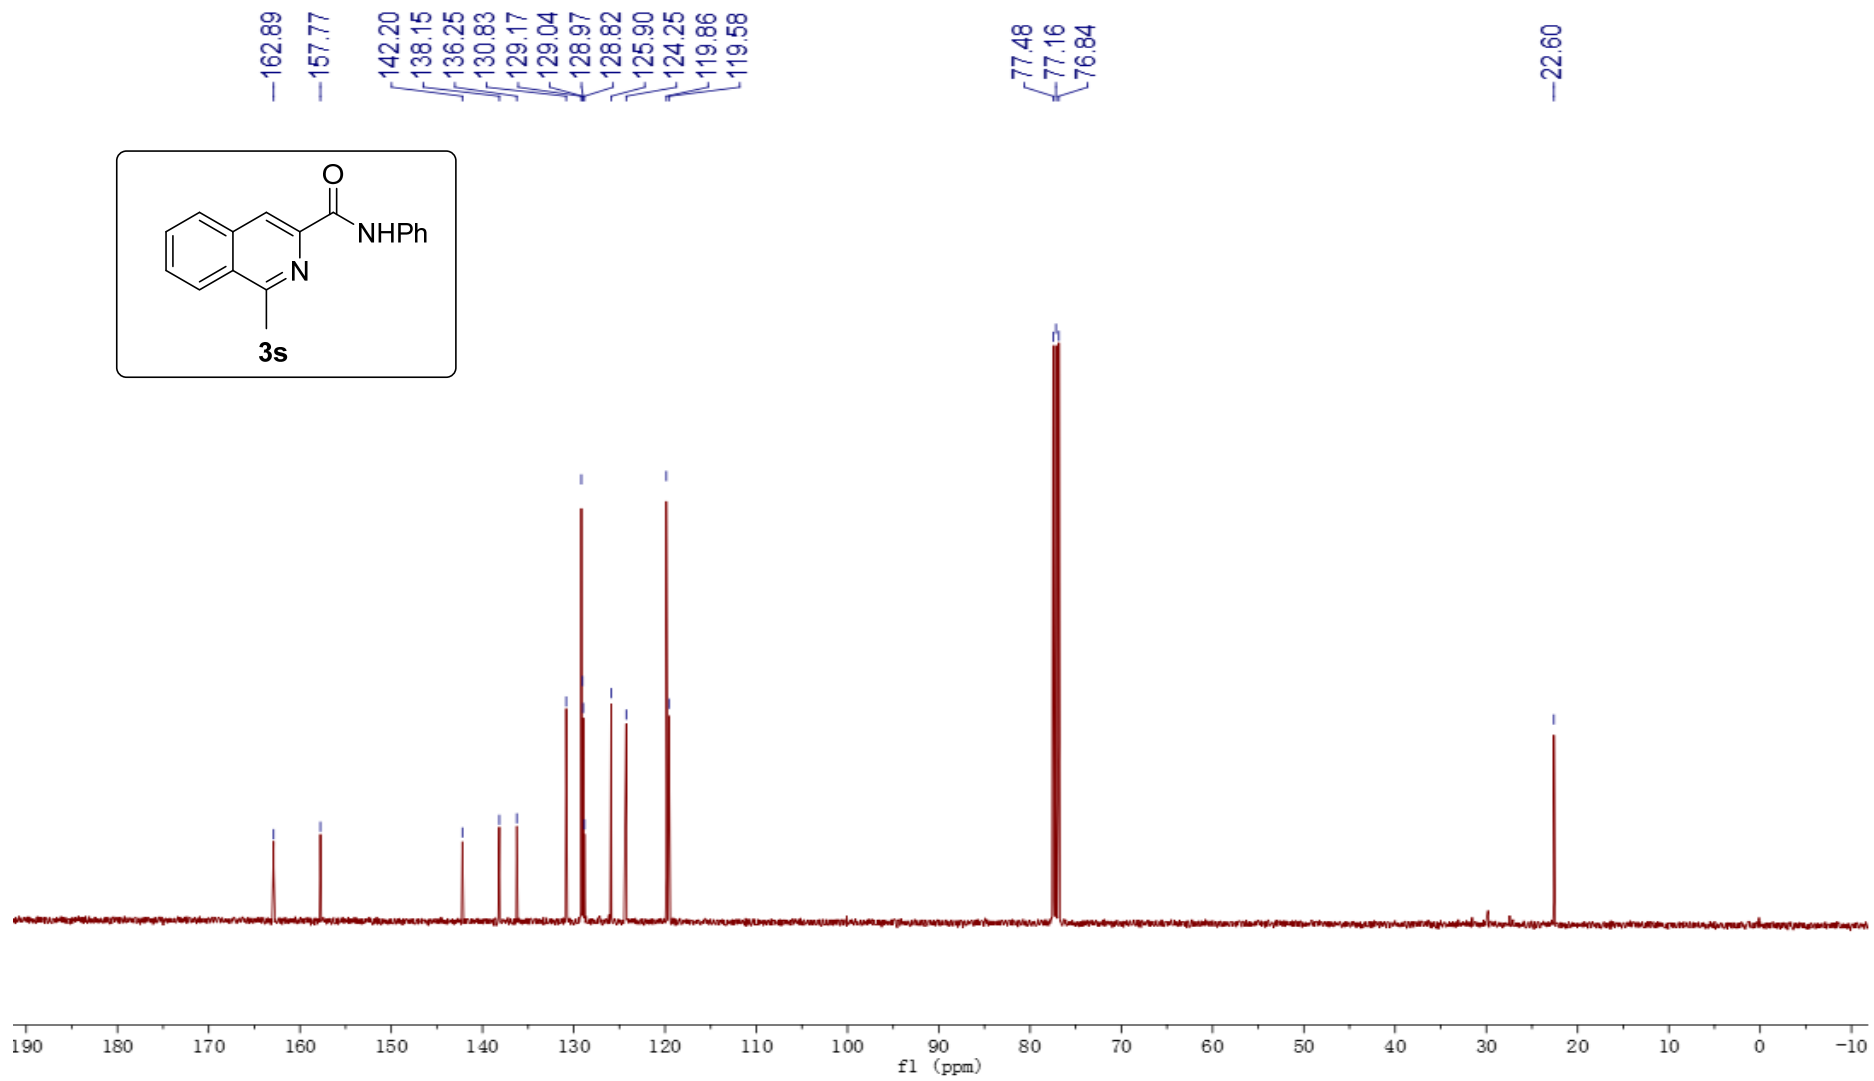

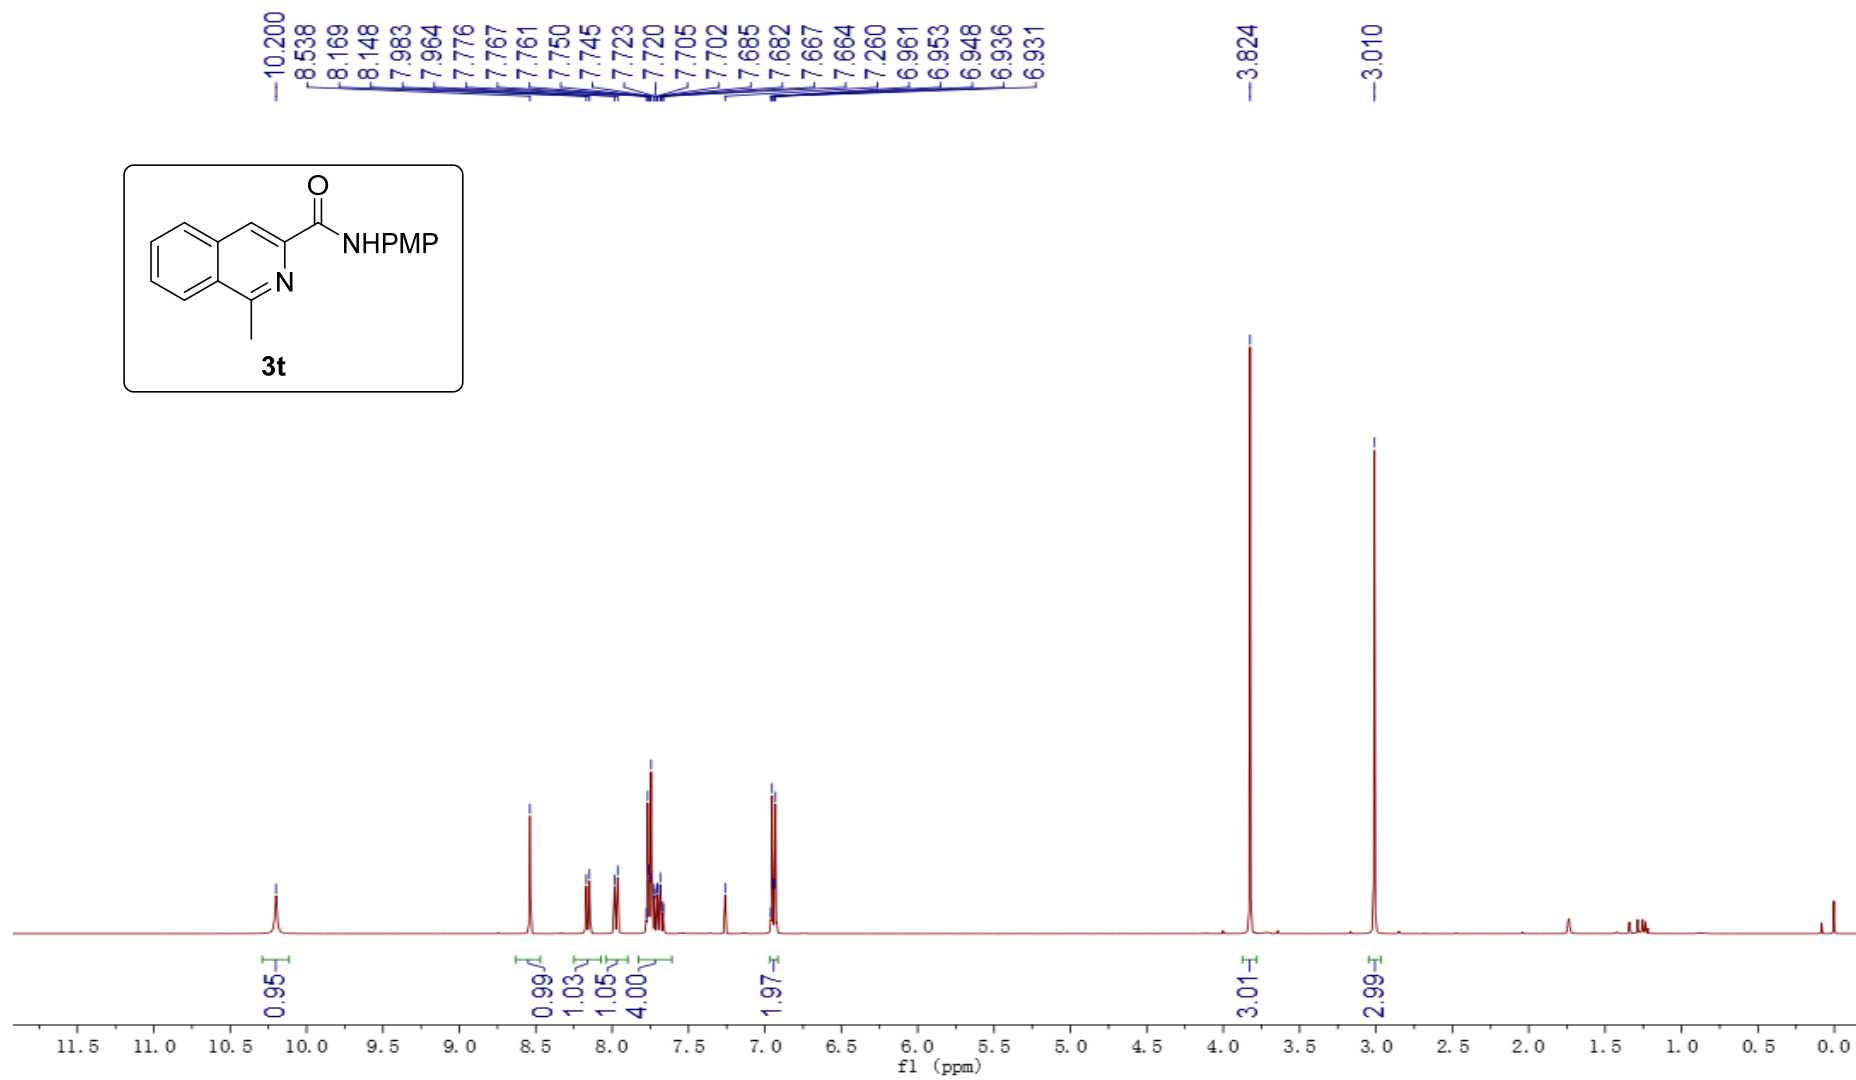

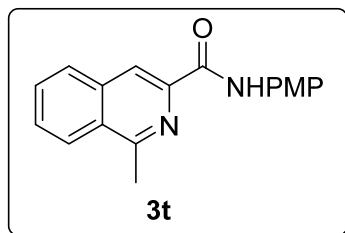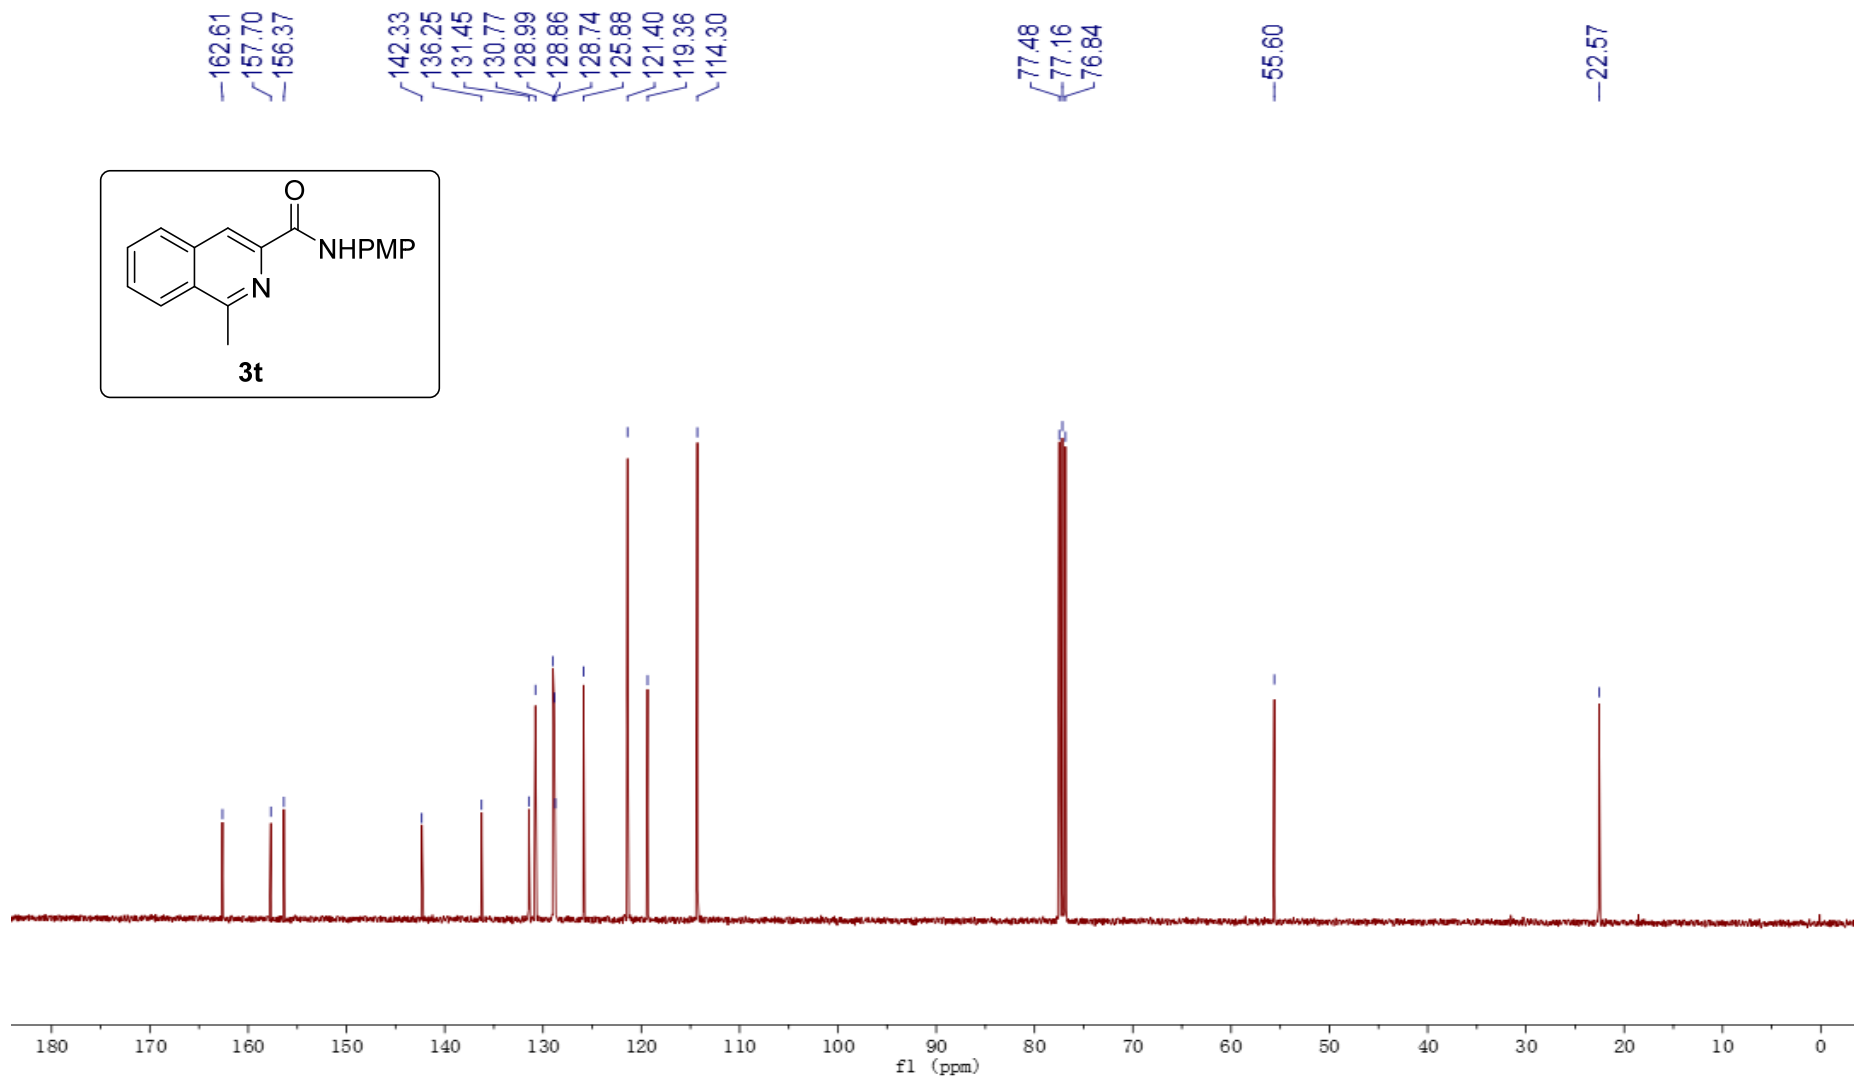

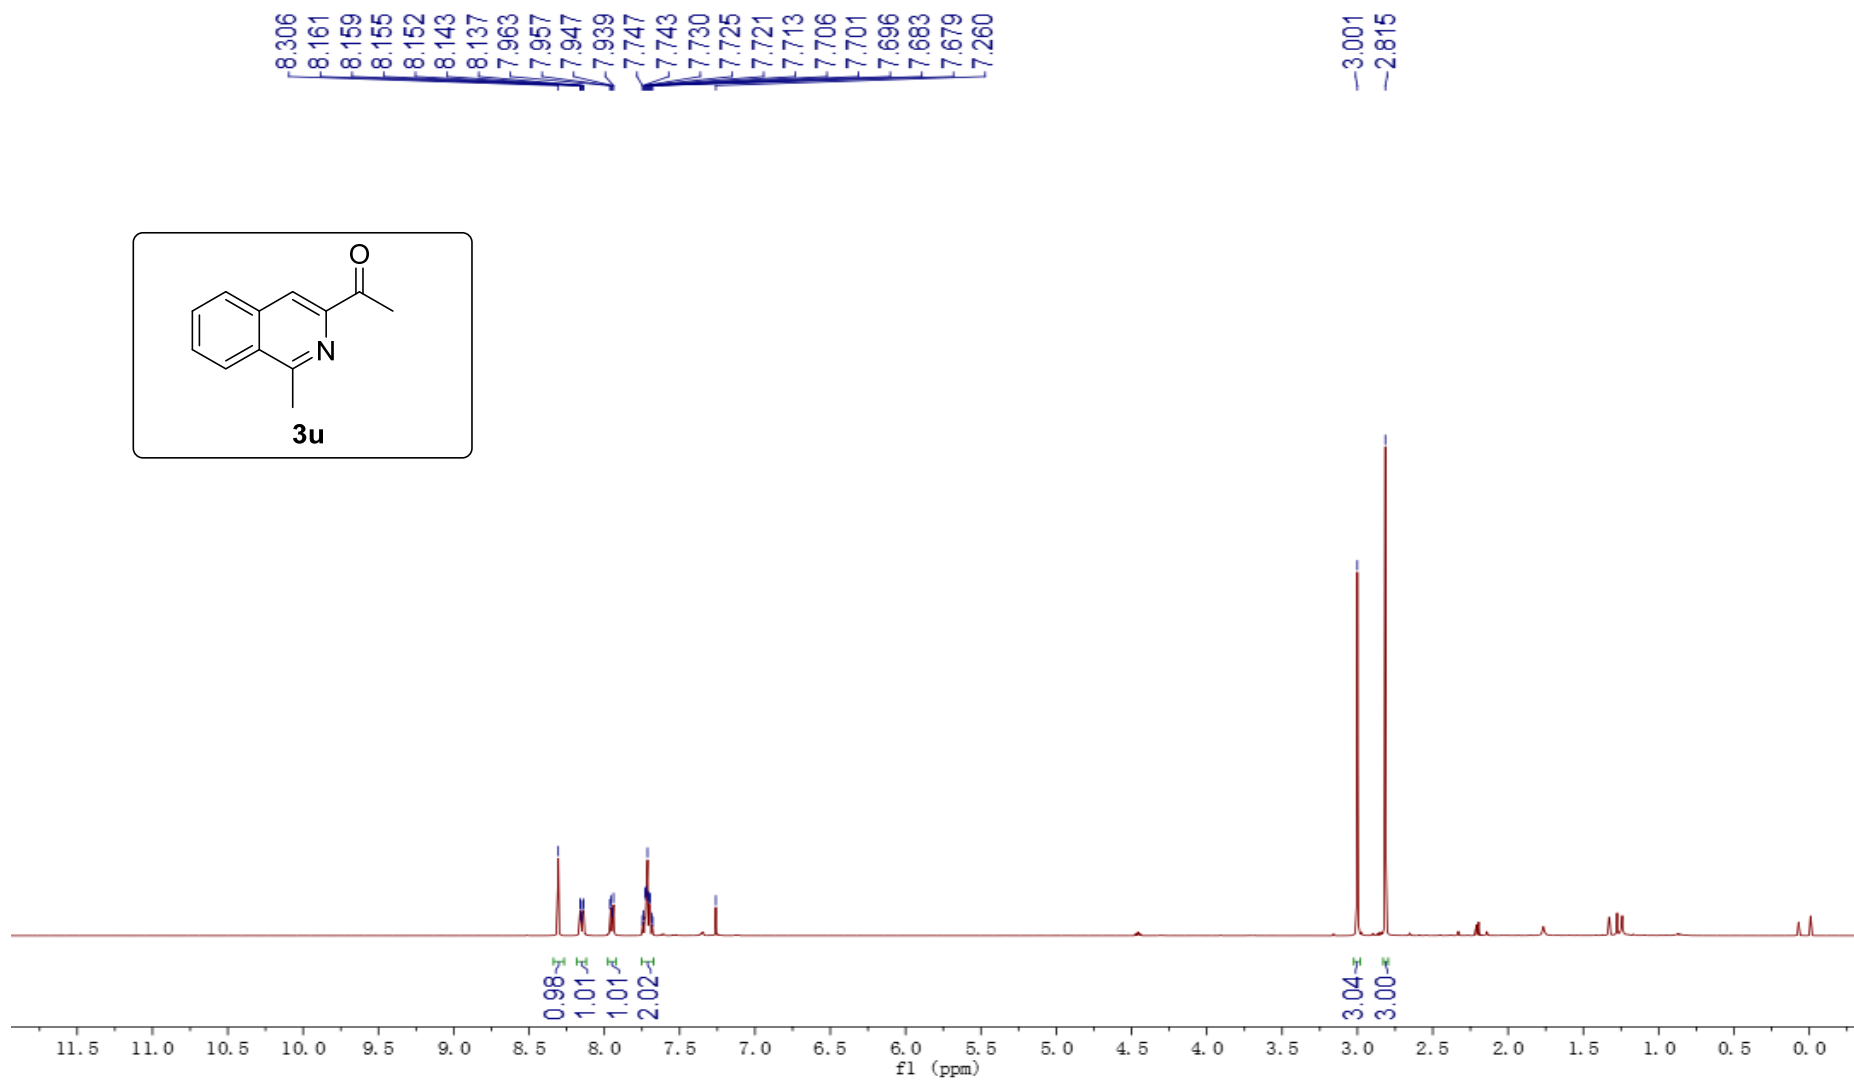



-200.96

-158.47

-146.69

135.62

130.53

129.48

129.30

129.16

125.75

119.12

77.48

77.16

76.84

-26.56

-22.73

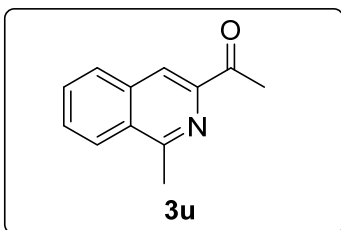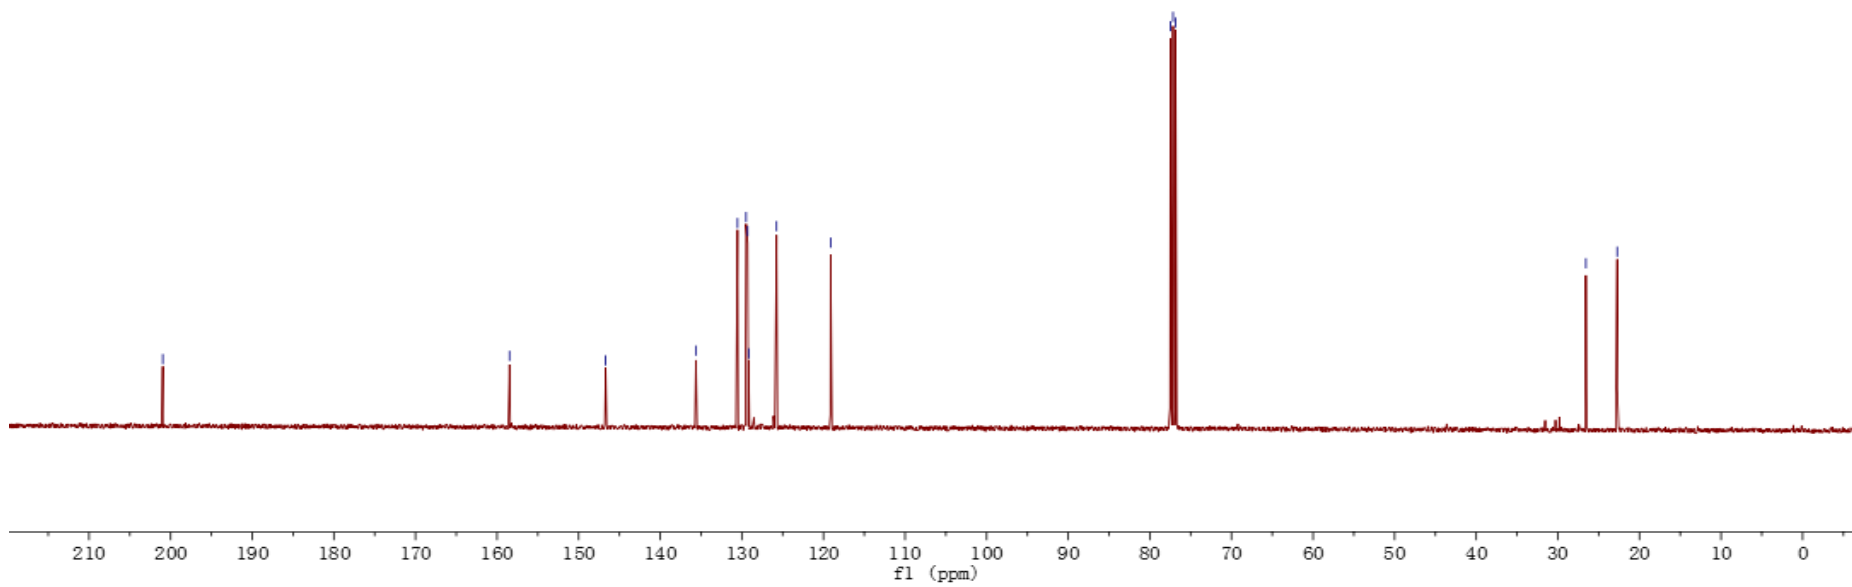

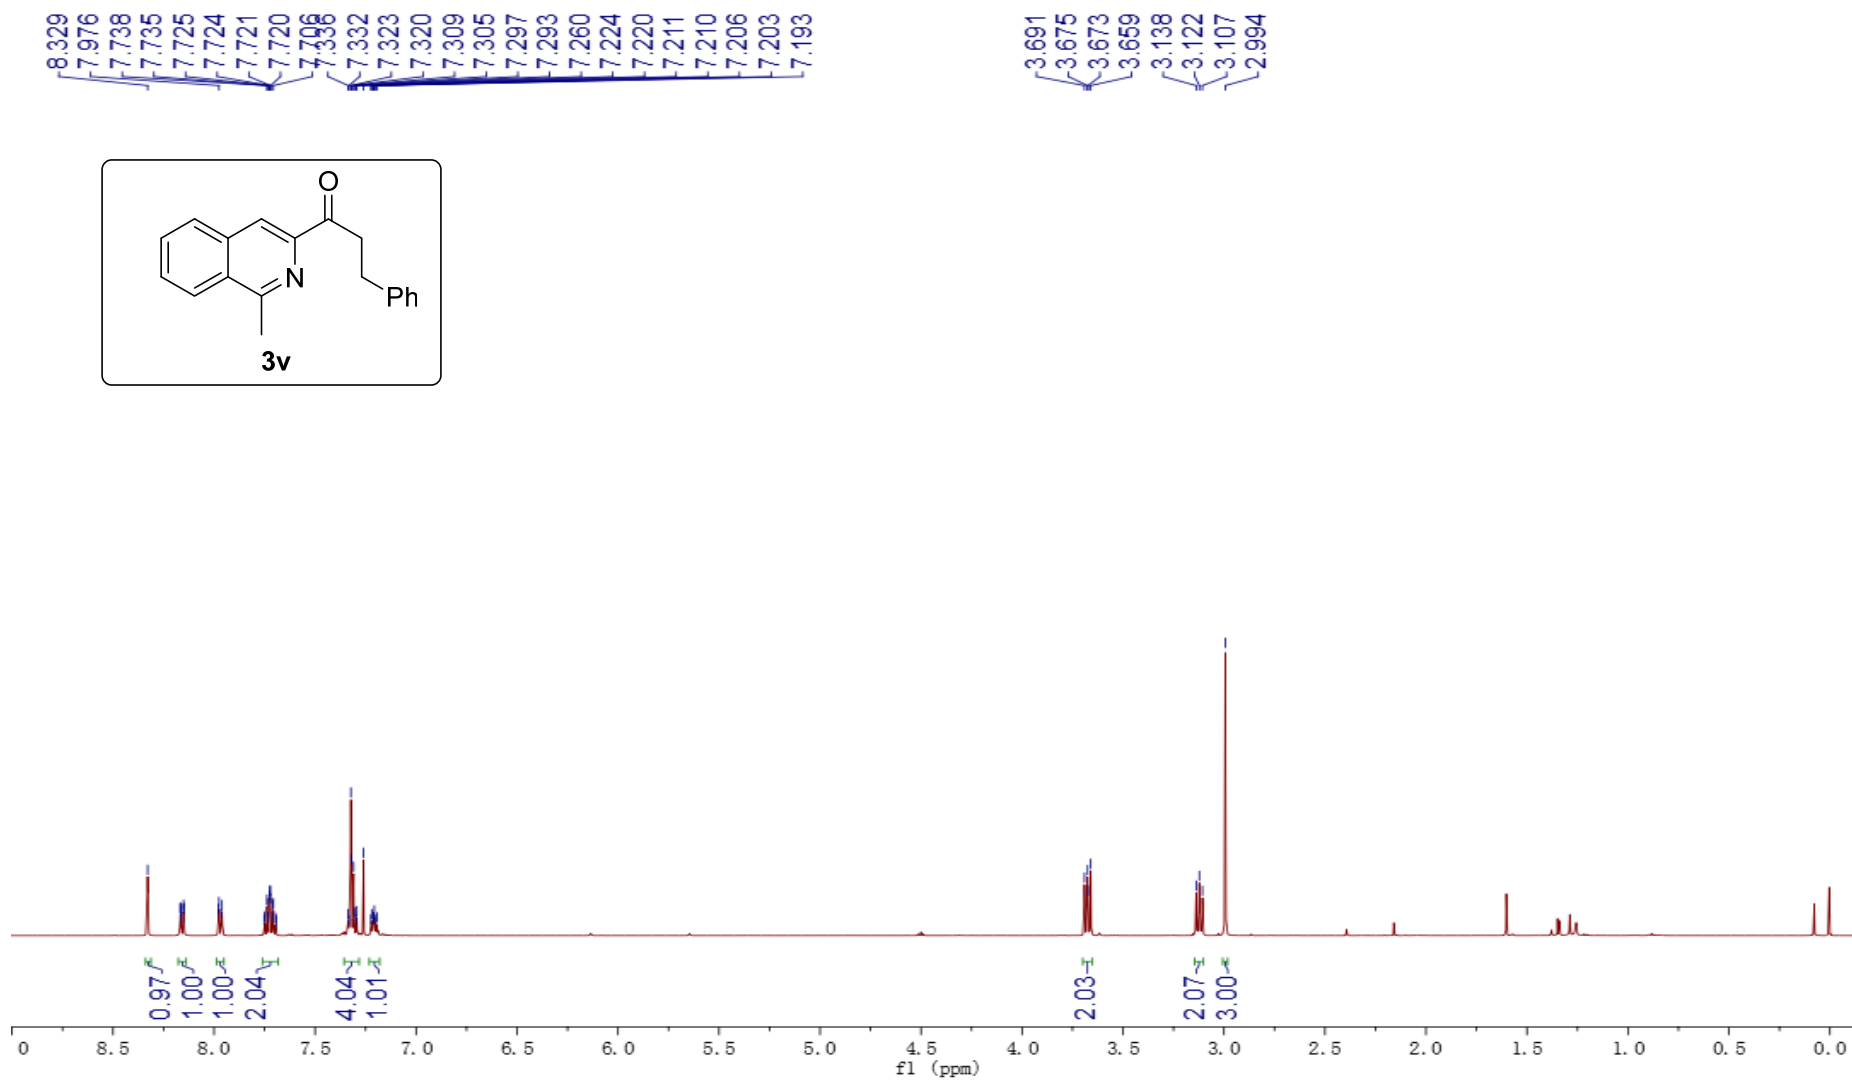

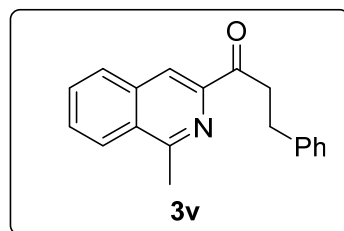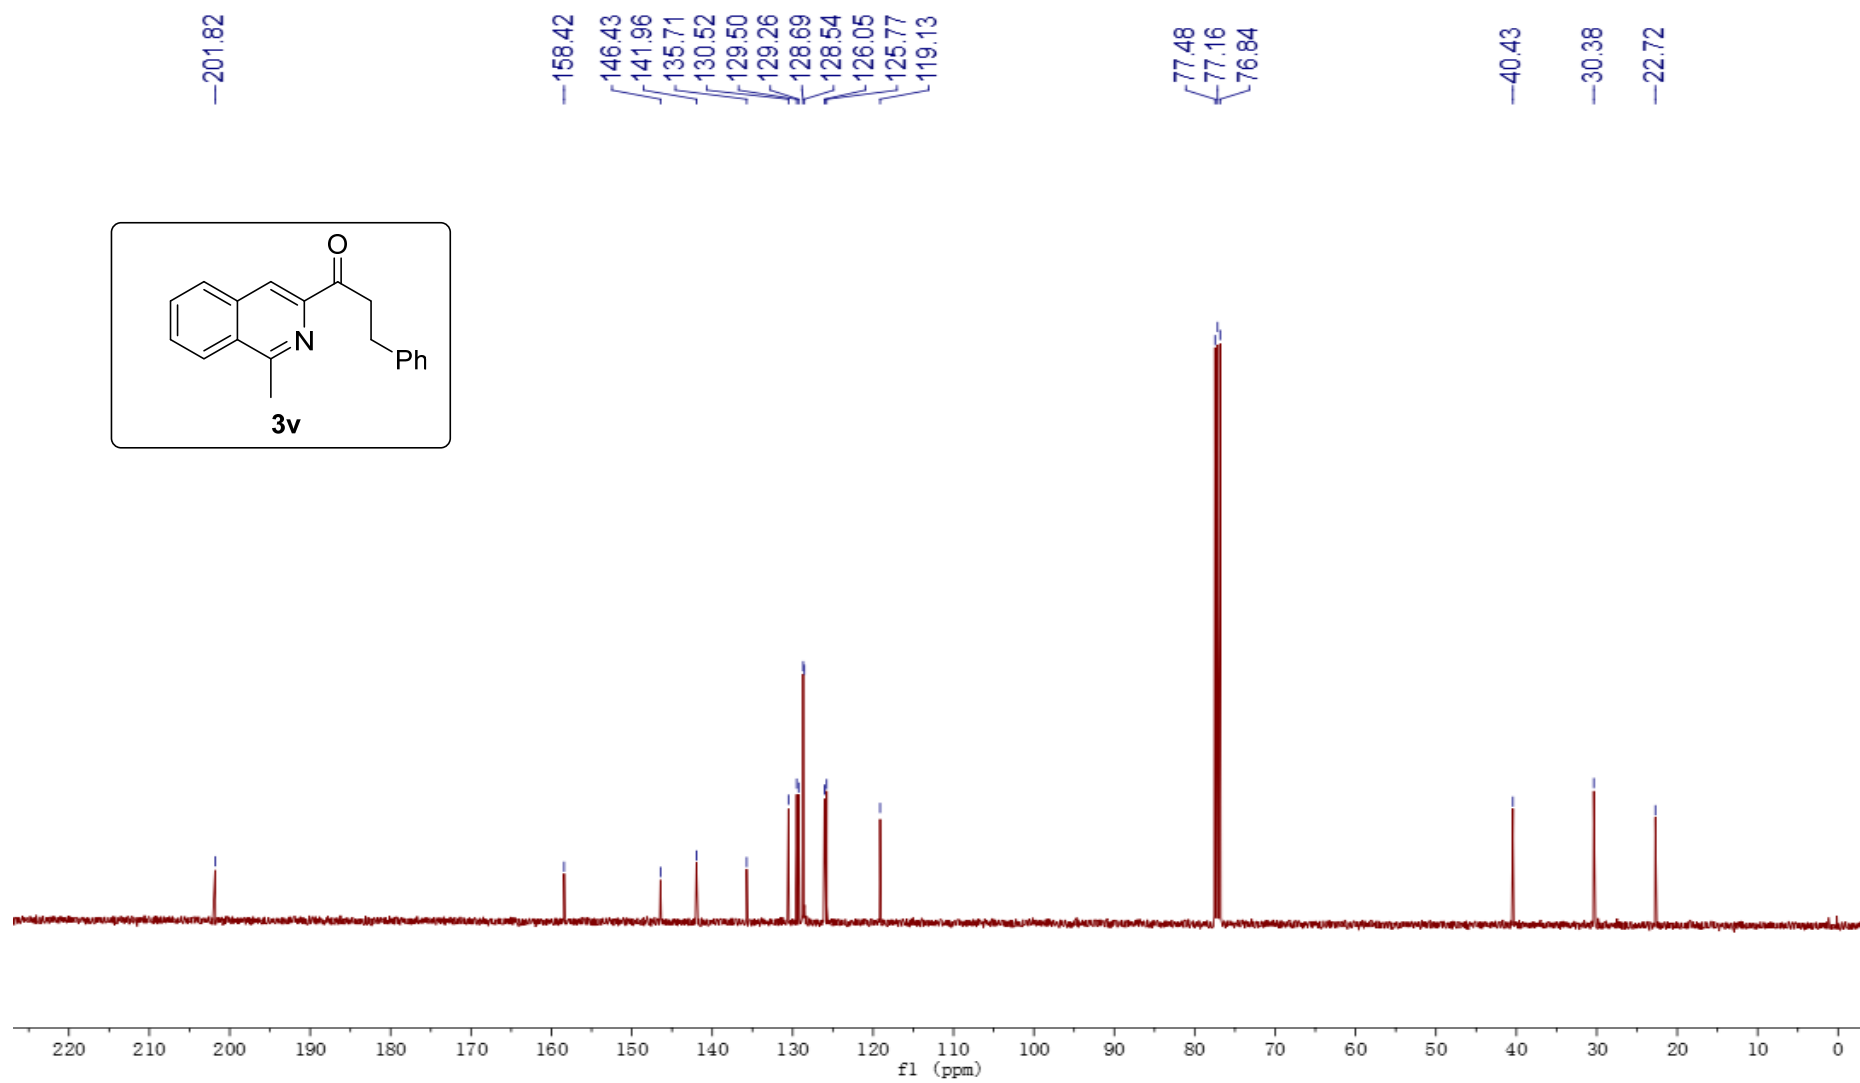

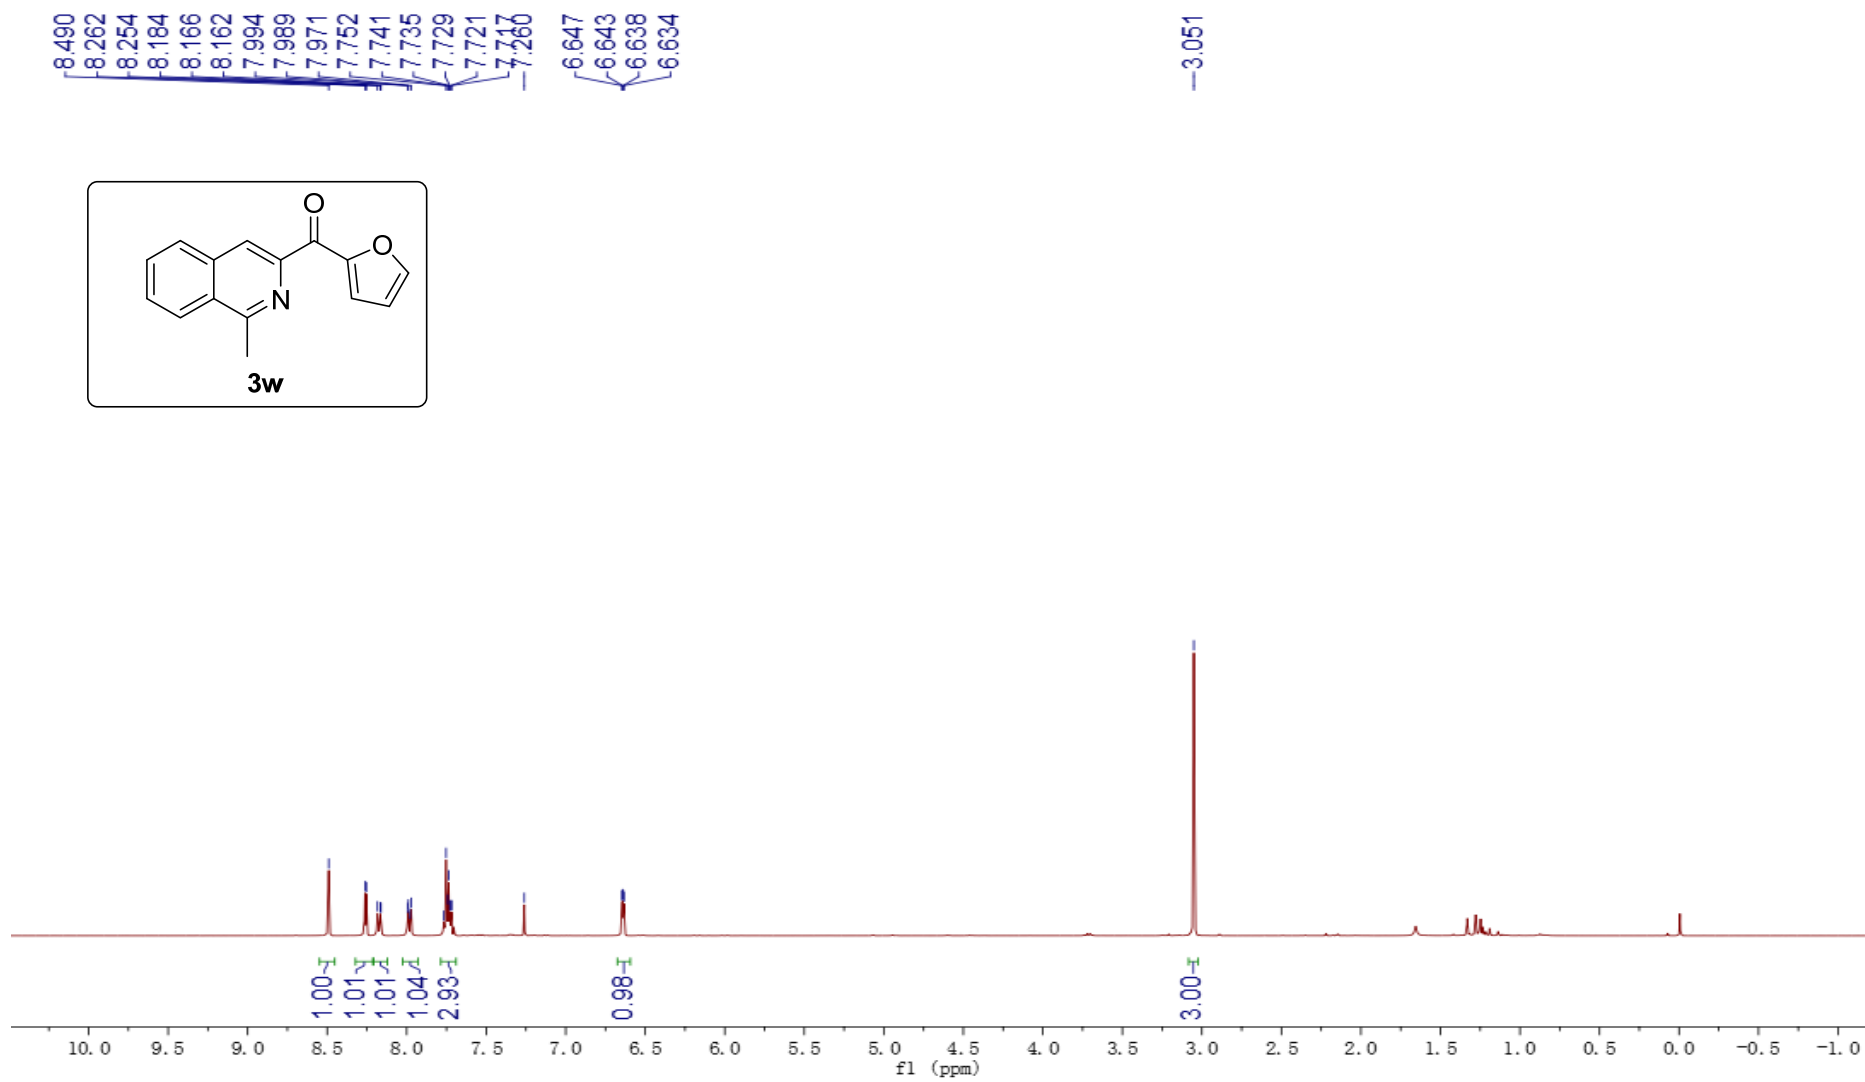

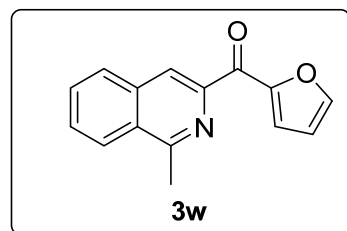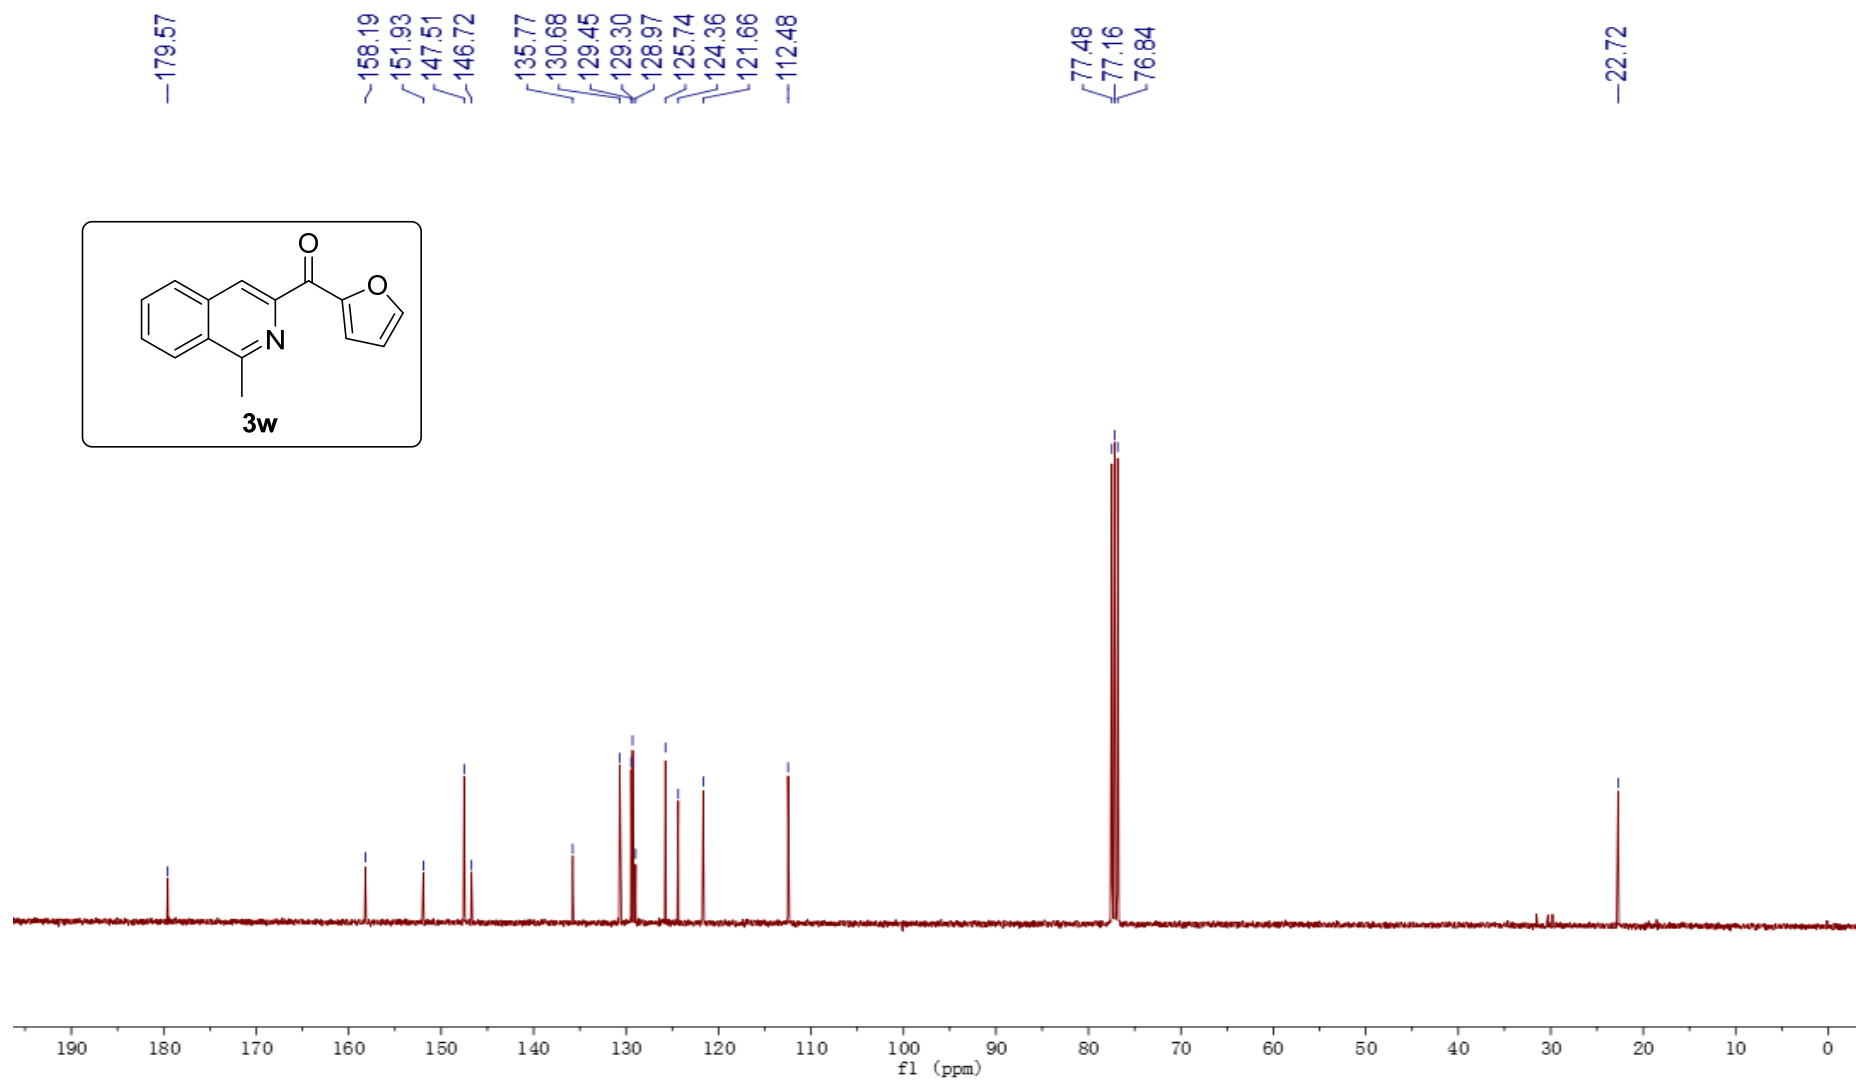

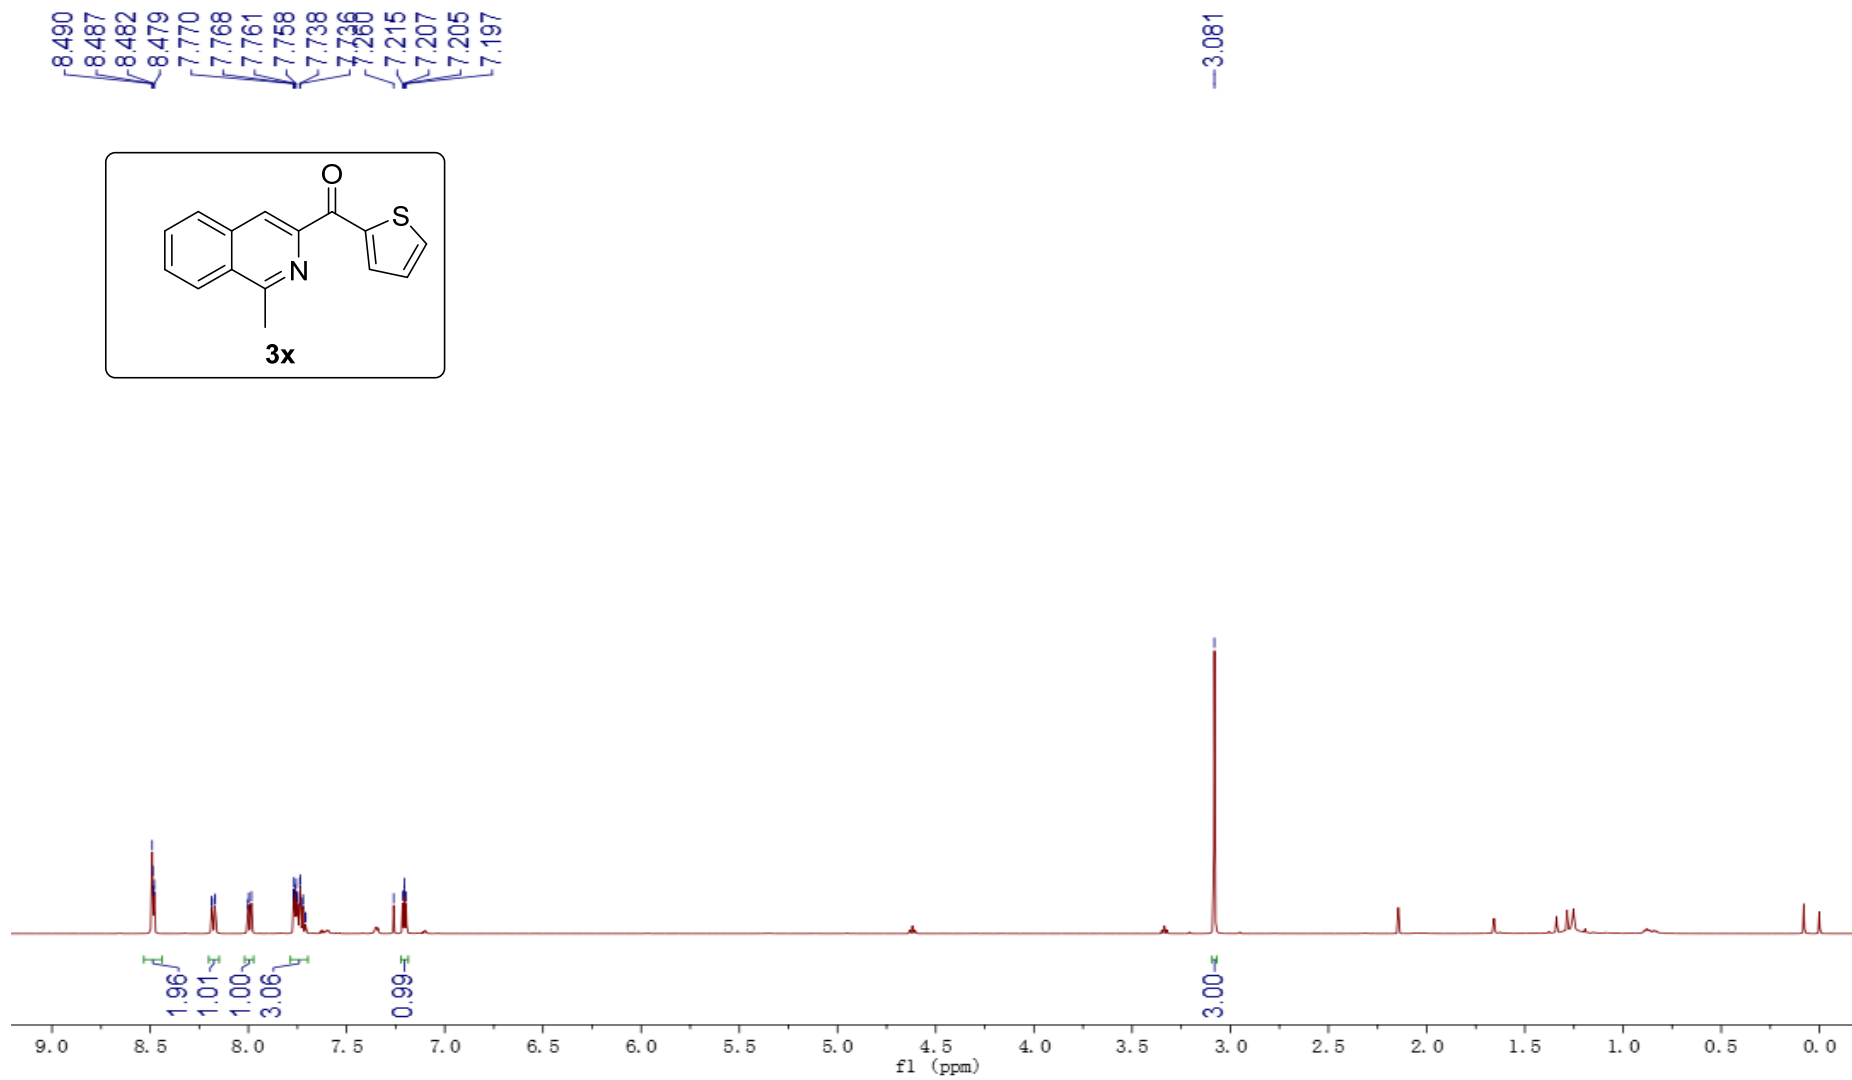

183.78

157.87

146.58

140.56

136.58

136.55

135.95

130.65

129.44

129.38

129.03

127.40

125.72

121.32

77.48

77.16

76.84

22.18

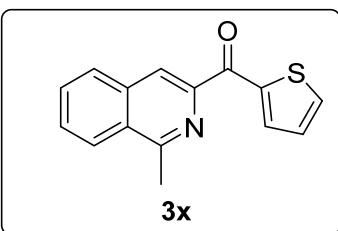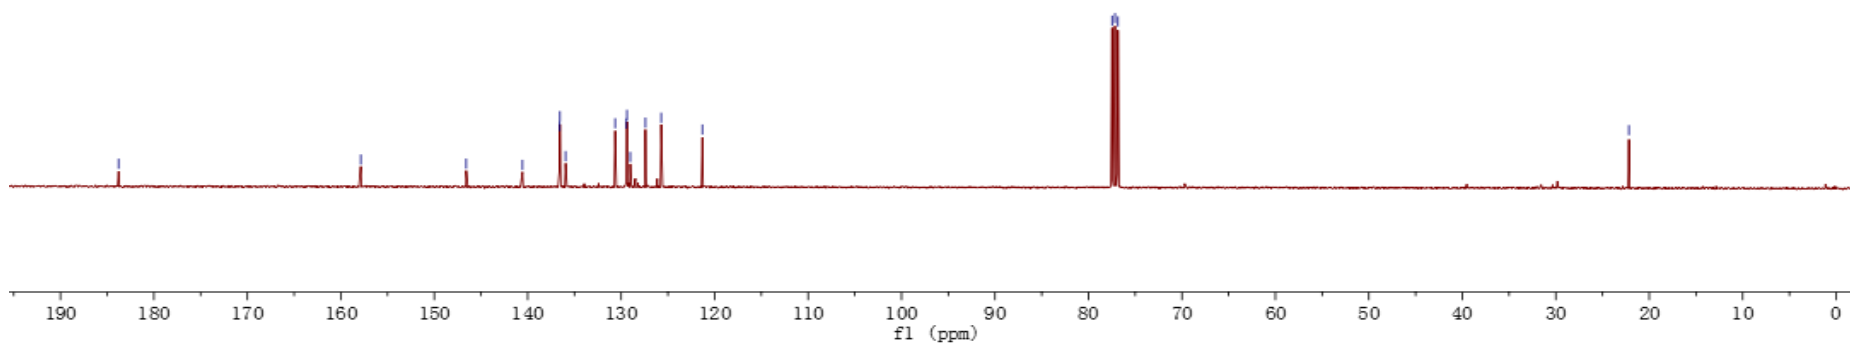

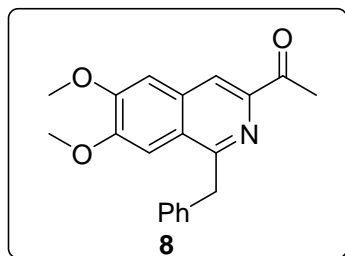

8.245

7.330  
7.290  
7.286  
7.269  
7.260  
7.188  
7.179

4.633

4.008  
3.902

2.804

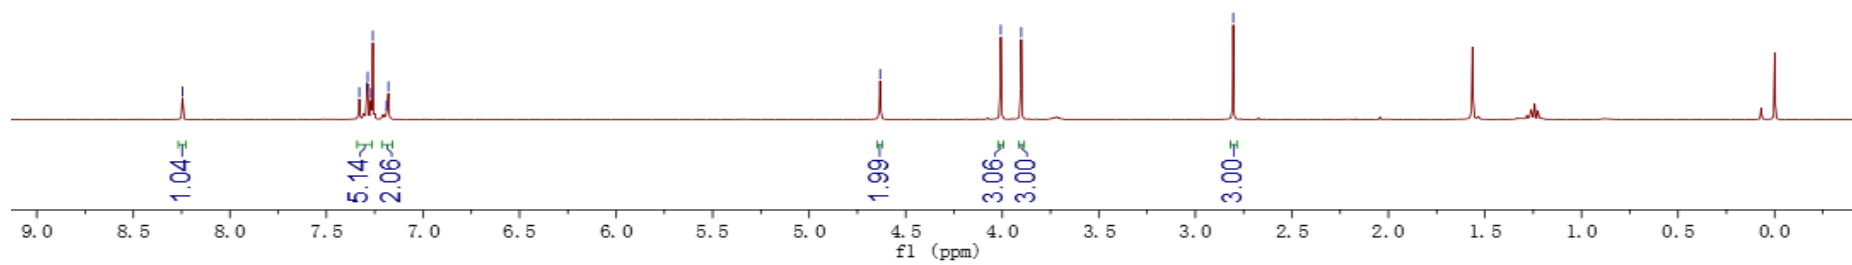



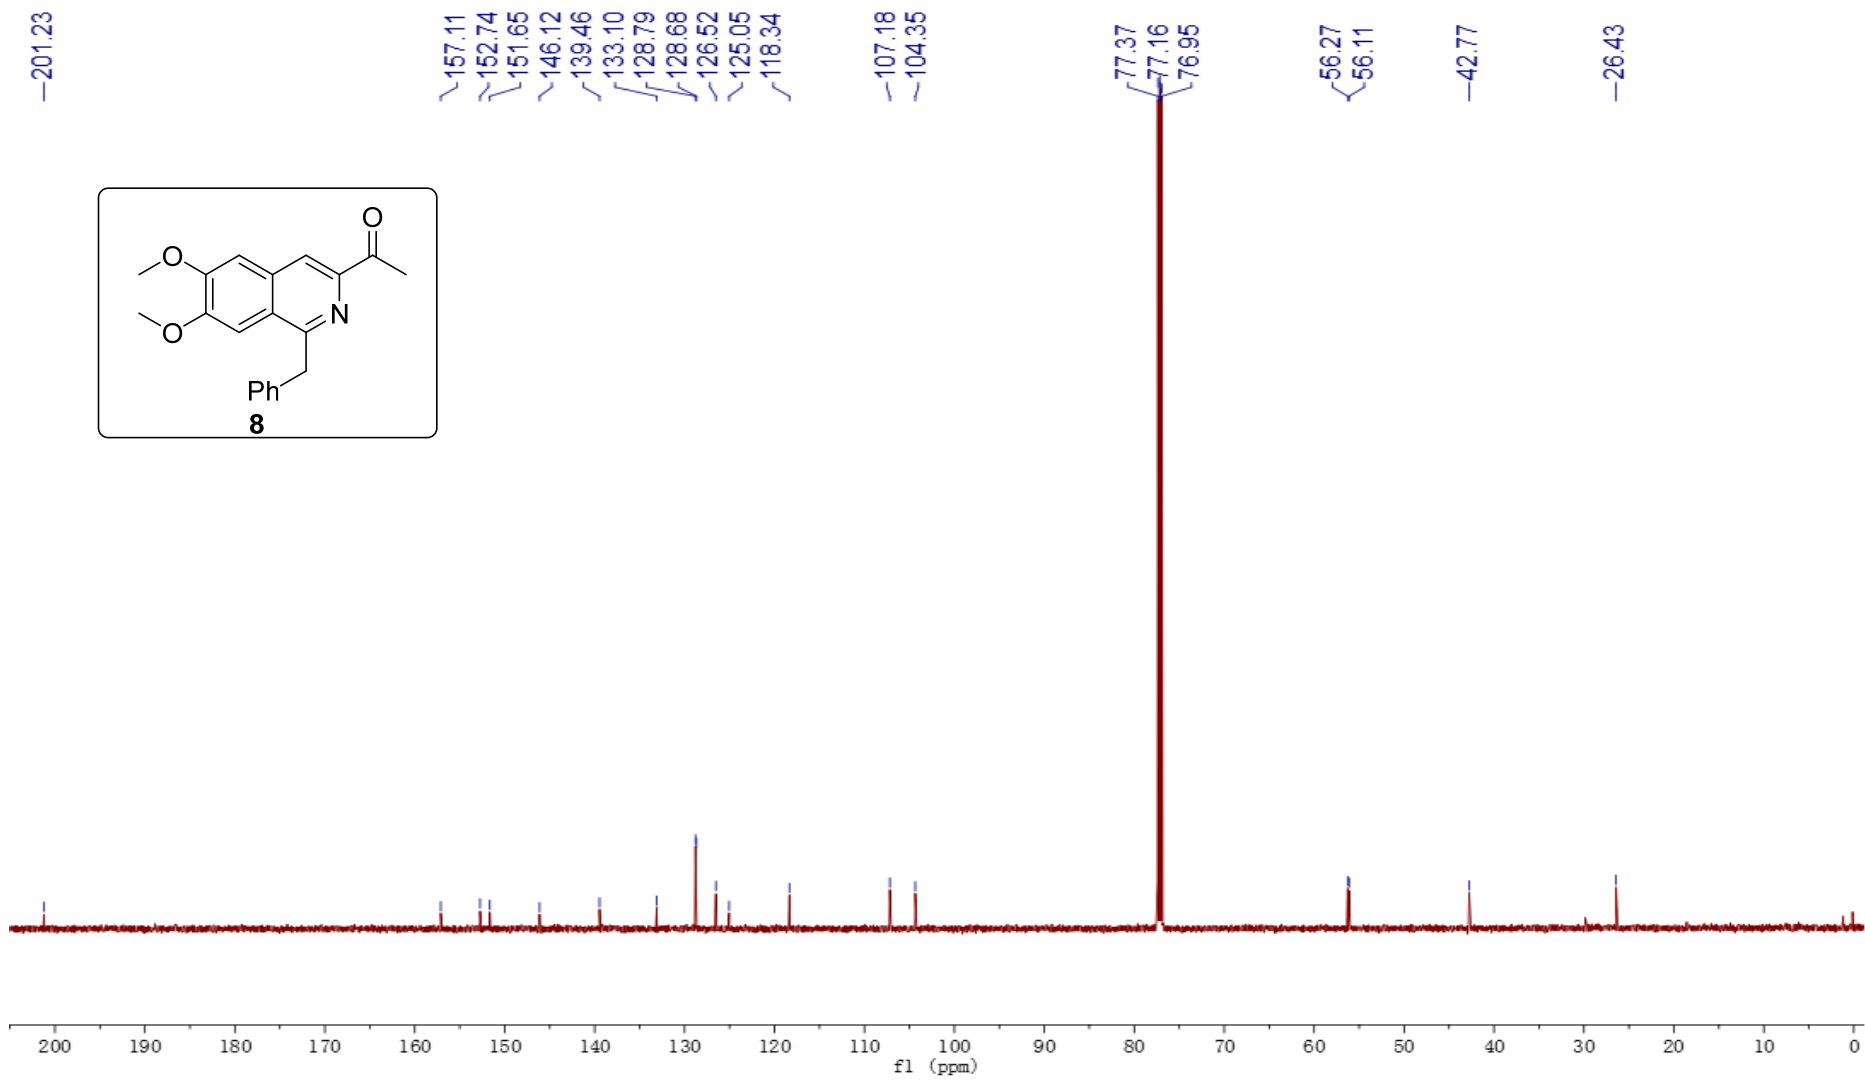

7.195  
7.184  
7.179  
7.173  
7.167  
7.155  
7.147  
7.140  
7.135  
7.087  
7.070  
6.905

4.507

3.896  
3.752

2.907  
2.889  
2.870  
2.851

1.337  
1.319  
1.300

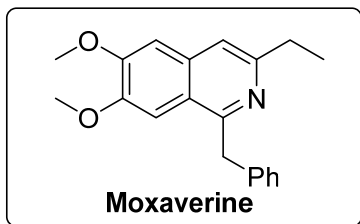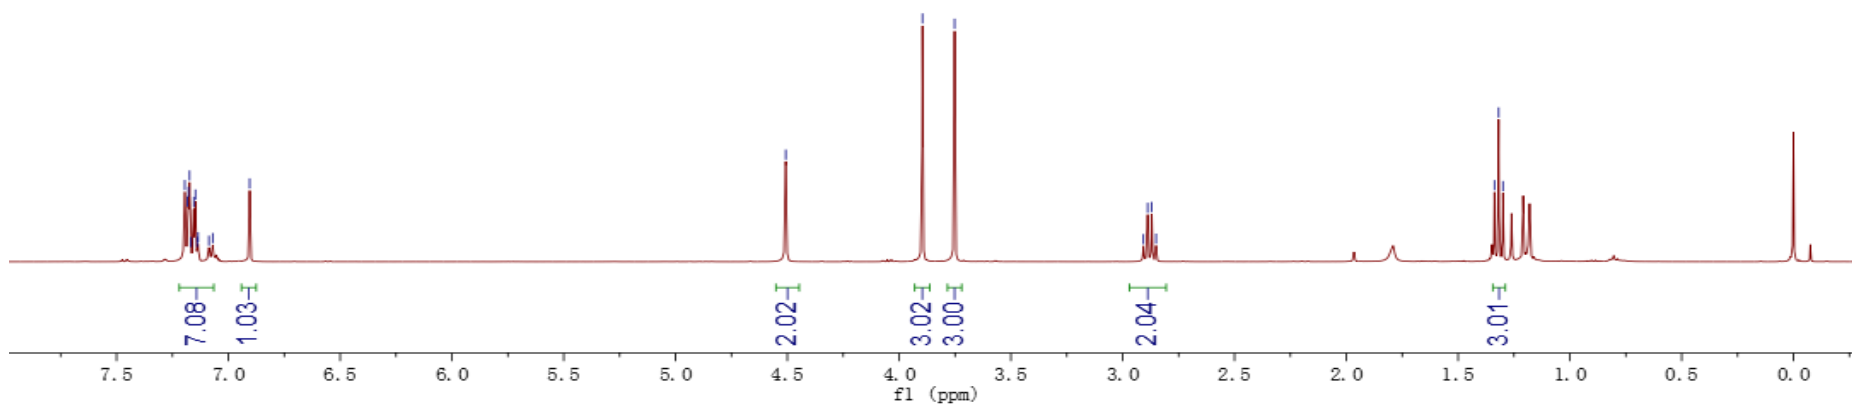

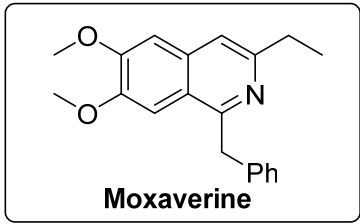

- 157.20
- 154.95
- 152.45
- 149.18
- 139.99
- 134.37
- 128.61
- 128.57
- 126.25
- 121.18
- 115.54
- 105.04
- 104.45
- 77.48
- 77.16
- 76.84
- 56.05
- 55.89
- 42.93
- 31.16
- 14.43

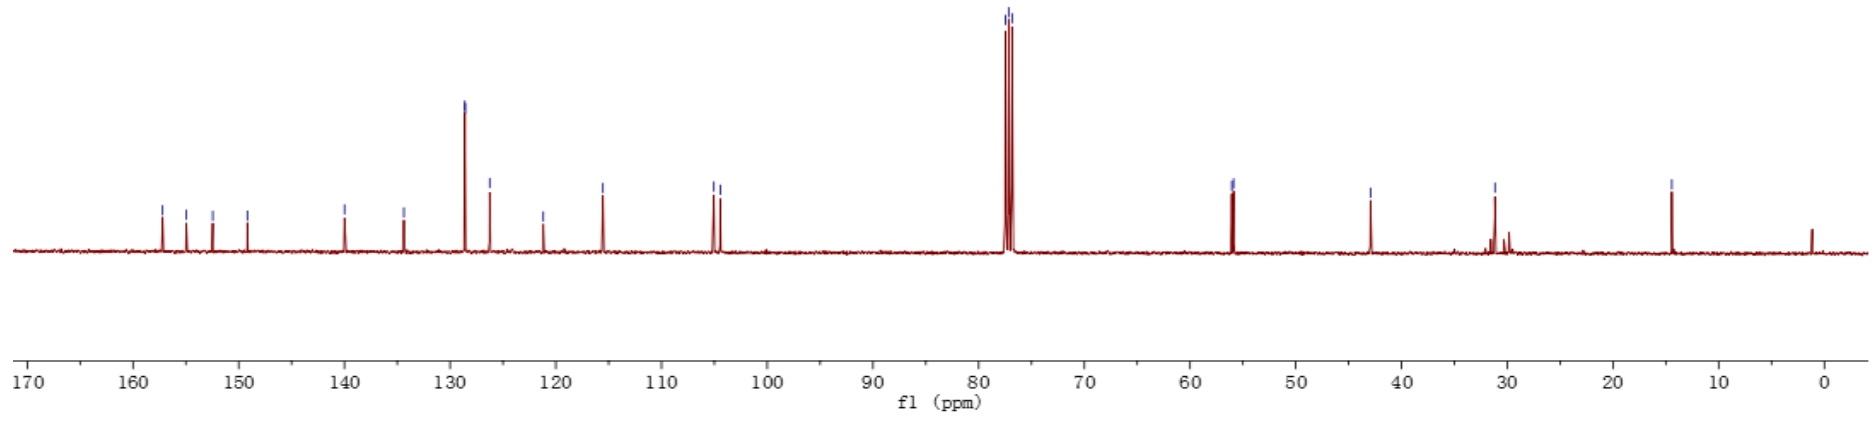

Supplement: c6ob00942e1.pdf [file c6ob00942e1.pdf]
